1 **TITLE**

2 The tumor microenvironment drives transcriptional phenotypes and their plasticity in metastatic  
3 pancreatic cancer

4  
5 **AUTHORS**

6 Srivatsan Raghavan<sup>1,2,3,4\*</sup>, Peter S. Winter<sup>1,2,5,6\*\*</sup>, Andrew W. Navia<sup>1,2,5,6,7\*</sup>, Hannah L. Williams<sup>1,3\*</sup>, Alan  
7 DenAdel<sup>8,9</sup>, Radha L. Kalekar<sup>1,2</sup>, Jennyfer Galvez-Reyes<sup>2,5,6</sup>, Kristen E. Lowder<sup>1,2</sup>, Nolawit Mulugeta<sup>2,5,6</sup>,  
8 Manisha S. Raghavan<sup>1,2</sup>, Ashir A. Borah<sup>2</sup>, Kevin S. Kapner<sup>1,2</sup>, Sara A. Väyrynen<sup>1</sup>, Andressa Dias Costa<sup>1,3</sup>,  
9 Raymond W.S. Ng<sup>1,2</sup>, Junning Wang<sup>1</sup>, Emma Reilly<sup>1</sup>, Dorisanne Y. Ragon<sup>1</sup>, Lauren K. Brais<sup>1</sup>, Alex M.  
10 Jaeger<sup>6</sup>, Liam F. Spurr<sup>1,2</sup>, Yvonne Y. Li<sup>1,2</sup>, Andrew D. Cherniack<sup>1,2,3</sup>, Isaac Wakiro<sup>1</sup>, Asaf Rotem<sup>1,2,10</sup>,  
11 Bruce E. Johnson<sup>1,3,4,10</sup>, James M. McFarland<sup>2</sup>, Ewa T. Sicinska<sup>3,11</sup>, Tyler E. Jacks<sup>6</sup>, Thomas E.  
12 Clancy<sup>1,3,12</sup>, Kimberly Perez<sup>1,3,4</sup>, Douglas A. Rubinson<sup>1,3,4</sup>, Kimmie Ng<sup>1,3,4</sup>, James M. Cleary<sup>1,3,4</sup>, Lorin  
13 Crawford<sup>8,13,14</sup>, Scott R. Manalis<sup>6,15</sup>, Jonathan A. Nowak<sup>3,11,16</sup>, Brian M. Wolpin<sup>1,3,4</sup>¶, William C. Hahn<sup>1,2,3,4</sup>¶,  
14 Andrew J. Aguirre<sup>1,2,3,4</sup>¶#, Alex K. Shalek<sup>2,3,5,6,7,17</sup>¶#

15  
16 **AFFILIATIONS**

17 <sup>1</sup>Department of Medical Oncology, Dana-Farber Cancer Institute, Boston, MA  
18 <sup>2</sup>Broad Institute of MIT and Harvard, Cambridge, MA  
19 <sup>3</sup>Harvard Medical School, Boston, MA  
20 <sup>4</sup>Department of Medicine, Brigham and Women's Hospital, Boston, MA  
21 <sup>5</sup>Institute for Medical Engineering & Science, Massachusetts Institute of Technology, Cambridge, MA  
22 <sup>6</sup>Koch Institute for Integrative Cancer Research, Massachusetts Institute of Technology, Cambridge, MA  
23 <sup>7</sup>Department of Chemistry, Massachusetts Institute of Technology, Cambridge, MA  
24 <sup>8</sup>Center for Computational Molecular Biology, Brown University, Providence, RI  
25 <sup>9</sup>Division of Applied Mathematics, Brown University, Providence, RI  
26 <sup>10</sup>Center for Cancer Genomics, Dana-Farber Cancer Institute, Boston, MA  
27 <sup>11</sup>Department of Oncologic Pathology, Dana-Farber Cancer Institute, Boston, MA  
28 <sup>12</sup>Department of Surgery, Brigham and Women's Hospital, Boston, MA  
29 <sup>13</sup>Department of Biostatistics, Brown University, Providence, RI  
30 <sup>14</sup>Microsoft Research New England, Cambridge, MA  
31 <sup>15</sup>Department of Biological Engineering, Massachusetts Institute of Technology, Cambridge, MA  
32 <sup>16</sup>Department of Pathology, Brigham and Women's Hospital, Boston, MA  
33 <sup>17</sup>Ragon Institute of MGH, MIT, and Harvard, Cambridge, MA

34  
35 \*Equal first author contribution

36 ¶Equal senior contribution

37 #To whom correspondence should be addressed:

38 Peter S. Winter, Ph.D., [pswinter@mit.edu](mailto:pswinter@mit.edu)

39 Andrew J. Aguirre, M.D., Ph.D., [andrew\\_aguirre@dfci.harvard.edu](mailto:andrew_aguirre@dfci.harvard.edu)

40 Alex K. Shalek, Ph.D., [shalek@mit.edu](mailto:shalek@mit.edu)

41

42

43 **SUMMARY**

44 Bulk transcriptomic studies have defined classical and basal-like gene expression subtypes in pancreatic  
45 ductal adenocarcinoma (PDAC) that correlate with survival and response to chemotherapy; however, the  
46 underlying mechanisms that govern these subtypes and their heterogeneity remain elusive. Here, we  
47 performed single-cell RNA-sequencing of 23 metastatic PDAC needle biopsies and matched organoid  
48 models to understand how tumor cell-intrinsic features and extrinsic factors in the tumor  
49 microenvironment (TME) shape PDAC cancer cell phenotypes. We identify a novel cancer cell state that  
50 co-expresses basal-like and classical signatures, demonstrates upregulation of developmental and  
51 KRAS-driven gene expression programs, and represents a transitional intermediate between the basal-  
52 like and classical poles. Further, we observe structure to the metastatic TME supporting a model whereby  
53 reciprocal intercellular signaling shapes the local microenvironment and influences cancer cell  
54 transcriptional subtypes. In organoid culture, we find that transcriptional phenotypes are plastic and  
55 strongly skew toward the classical expression state, irrespective of genotype. Moreover, we show that  
56 patient-relevant transcriptional heterogeneity can be rescued by supplementing organoid media with  
57 factors found in the TME in a subtype-specific manner. Collectively, our study demonstrates that distinct  
58 microenvironmental signals are critical regulators of clinically relevant PDAC transcriptional states and  
59 their plasticity, identifies the necessity for considering the TME in cancer modeling efforts, and provides  
60 a generalizable approach for delineating the cell-intrinsic versus -extrinsic factors that govern tumor cell  
61 phenotypes.

62

63 **KEYWORDS**

64 Pancreatic cancer, Single-cell RNA sequencing, Cancer cell states, Transcriptional phenotypes,  
65 Plasticity, Patient-derived organoid models, Genotype-phenotype relationships, Tumor  
66 microenvironment, Liver metastases, Tumor heterogeneity

## 67 INTRODUCTION

68 Classification of human malignancies by genotype has provided important insights into tumor biology as  
69 well as a framework to guide therapeutic selection in many cancers (Hyman et al., 2017). However,  
70 tumors also exhibit clinically relevant transcriptional variation that can influence malignant progression  
71 and therapeutic response. The application of single-cell RNA-sequencing (scRNA-seq) to tumor  
72 specimens has afforded a means to characterize the malignant and non-malignant cellular components  
73 of the tumor microenvironment (TME) and their heterogeneity at unprecedented resolution (Kim et al.,  
74 2018; Patel et al., 2014; Puram et al., 2017; Sade-Feldman et al., 2019; Suva and Tirosh, 2019; Tirosh  
75 et al., 2016a; van Galen et al., 2019; Venteicher et al., 2017). These analytical approaches have further  
76 enabled the re-examination of existing transcriptional taxonomies, revealing structured heterogeneity  
77 within malignant populations and reframing our understanding of bulk measurements in multiple cancers  
78 (Filbin et al., 2018; Hovestadt et al., 2019; Neftel et al., 2019; Patel et al., 2014; Tirosh et al., 2016b;  
79 Venteicher et al., 2017).

80 The phenotypic variability observed in human tumors often reflects the underlying cancer cell  
81 genetics. Specific mutations can program cancer cell states and, in some cases, serve as biomarkers for  
82 treatment (Filbin et al., 2018; Hovestadt et al., 2019; van Galen et al., 2019; Venteicher et al., 2017). Yet,  
83 in other instances, transcriptional phenotypes are not strongly associated with specific mutational  
84 patterns (Nam et al., 2021). In these tumors, cell-extrinsic TME interactions may influence malignant  
85 cellular attributes, but our understanding of reciprocal signaling between malignant cells and the TME is  
86 rudimentary. Mapping the cell-intrinsic and -extrinsic factors that impact tumor cell states and determining  
87 which ones drive phenotypic transitions would yield important insights into the biologic basis for clinical  
88 disease phenotypes and drug resistance.

89 For pancreatic ductal adenocarcinoma (PDAC), bulk RNA-seq profiling has defined two major  
90 transcriptional programs, basal-like/squamous (hereafter referred to as basal) and classical. The basal  
91 subtype is strongly associated with a poorer prognosis and greater treatment resistance (Aguirre et al.,  
92 2018; Aung et al., 2018; Bailey et al., 2016; Cancer Genome Atlas Research Network, 2017; Chan-Seng-  
93 Yue et al., 2020; Collisson et al., 2011; Connor et al., 2019; Moffitt et al., 2015; O'Kane et al., 2020; Porter  
94 et al., 2019; Tiriach et al., 2018), but the roles of cell-intrinsic and -extrinsic factors in determining these  
95 cell states and their sensitivity to different therapies are not well understood. A limited number of genomic  
96 alterations, including *TP53* mutational status and *c-MYC* or *KRAS* amplifications, have been associated  
97 with the more therapy-resistant basal state (Bailey et al., 2016; Cancer Genome Atlas Research Network,  
98 2017; Chan-Seng-Yue et al., 2020; Hayashi et al., 2020; Schleger et al., 2002). Recent studies have also  
99 suggested that high levels of *KRAS* expression and signaling can induce the basal state, but others have  
100 demonstrated that basal PDAC cells exhibit RAS-independence (Chan-Seng-Yue et al., 2020; Collisson

101 et al., 2011; Miyabayashi et al., 2020; Muzumdar et al., 2017). These findings suggest that while genomic  
102 activation of *KRAS* plays an important role in oncogenesis, other non-genetic and microenvironmental  
103 factors may also be critical in regulating downstream cellular states.

104 Although the majority of patients with PDAC present with and succumb to metastatic disease  
105 (Siegel et al., 2020), our current understanding of PDAC is largely derived from resected primary tumors  
106 (Aguirre et al., 2018; Cancer Genome Atlas Research Network, 2017; Siegel et al., 2020). While several  
107 recent studies have described the desmoplastic stromal microenvironment and immune infiltration in  
108 primary PDAC (Balachandran et al., 2019; Bernard et al., 2019; Biffi et al., 2019; Elyada et al., 2019;  
109 Ligorio et al., 2019; Ohlund et al., 2017), we lack a detailed characterization of the immune and stromal  
110 cells that constitute metastatic PDAC lesions. The local TME in the pancreas is likely different from  
111 metastatic sites in other organs (Ho et al., 2020), and given the strong association of transcriptional  
112 subtype with survival and drug resistance (Aguirre et al., 2018; Aung et al., 2018; Bailey et al., 2016;  
113 Cancer Genome Atlas Research Network, 2017; Chan-Seng-Yue et al., 2020; Collisson et al., 2011;  
114 Connor et al., 2019; Moffitt et al., 2015; O'Kane et al., 2020; Porter et al., 2019; Tiriac et al., 2018),  
115 understanding whether specific inputs from the metastatic niche can specify transcriptional phenotype is  
116 of great importance to targeting therapeutic resistance in PDAC.

117 To better understand the interplay between genetics, transcriptional state, and the metastatic  
118 TME, we developed and employed an optimized translational workflow to perform both high-resolution  
119 profiling of PDAC patient tissue using scRNA-seq (Gierahn et al., 2017; Hughes et al., 2020) and  
120 derivation of matched organoid models (Boj et al., 2015; Tiriac et al., 2018) from the same metastatic  
121 core needle biopsy. Using matched *in vivo* observations and *ex vivo* experimental studies, we describe  
122 a tumor cell atlas of metastatic PDAC, identify a new intermediate transitional PDAC cancer cell state,  
123 uncover distinct site- and subtype-specific TMEs, and demonstrate that microenvironmental signals are  
124 critical regulators of transcriptional subtypes and their plasticity.

125

## 126 **RESULTS**

### 127 **A clinical pipeline for matched single-cell profiling and organoid model generation**

128 We established a pipeline for collecting core needle biopsies from patients with metastatic PDAC (n=23)  
129 to generate matched scRNA-seq profiles and organoid models (**Figure 1A**; **Supplemental Figure S1A**;  
130 **Supplemental Table S1**). Most samples were obtained from metastatic lesions residing in the liver  
131 (19/23), and the majority (21/23) were analyzed by targeted DNA-sequencing, yielding the expected  
132 mutational pattern for this disease (**Figure 1B**) (Aguirre et al., 2018; Bailey et al., 2016; Cancer Genome  
133 Atlas Research Network, 2017). Our pipeline generated approximately 1,000 high-quality single cells per  
134 biopsy (n=23,042 total cells) and successful early-passage organoid cultures from 70% of patient tumor



135 samples (16/23 samples reaching at least passage 2; **Figure 1B; Supplemental Figure S1A,B**).  
136 Dimensionality reduction and shared nearest neighbor (SNN) clustering of the biopsy cells revealed  
137 substantial heterogeneity at the single-cell level (**Supplemental Figure S1C,D; Methods**). Consistent  
138 with other studies of human cancer, we observed patient-specific and admixed clusters of single cells  
139 suggesting the presence of both malignant and non-malignant cells in each biopsy (Kim et al., 2018;  
140 Puram et al., 2017; Sade-Feldman et al., 2019; Tirosh et al., 2016a; van Galen et al., 2019). To confirm  
141 which clusters were comprised of malignant cells, we inferred transcriptome-wide CNVs from our single-  
142 cell data as previously described (Patel et al., 2014; Tirosh et al., 2016b). CNV alteration scores  
143 separated putative cancerous and non-cancerous cells in each biopsy and demonstrated high  
144 concordance with reference targeted DNA-seq (**Figure 1C; Supplemental Figure S1E,F**). CNV analysis  
145 paired with manual inspection of expression patterns for known markers across single cells supported  
146 the identification of cancerous cells as well as 11 unique non-cancerous cell types (**Figure 1D,E;**  
147 **Supplemental Figure S1D-I; Supplemental Table S2**). Thus, we established a robust workflow capable  
148 of recovering high quality malignant (n=7,740) and non-malignant (n=15,302) populations from metastatic  
149 PDAC needle biopsies while also enabling simultaneous generation of matched organoid models.

150

### 151 **Tumor cell transcriptional subtypes in metastatic PDAC include an intermediate transitional state**

152 We applied principal component analysis (PCA) to examine transcriptional variation across cancer cells  
153 from all biopsy samples. CNV-altered cells from one biopsy, PANFR0580, separated from the rest of the  
154 samples (**Figure 1B; Supplemental Figure S2A**). Based on expression of known neuroendocrine  
155 markers (*TTR*, *CHGA*) and subsequent pathology review we reclassified this sample as a pancreatic  
156 neuroendocrine tumor (PanNET) and used it as a non-PDAC reference cell population. Among the  
157 remaining 7,078 PDAC cells, we found that genes driving the first 3 PCs were enriched for signatures of  
158 epithelial/mesenchymal transition [EMT, PC1, (Groger et al., 2012)], basal/classical state [PC2, (Moffitt  
159 et al., 2015)], and cell cycle [PC3, (Tirosh et al., 2016a)] (**Supplemental Figure S2B**). When we scored  
160 all malignant cells within our cohort for basal and classical gene expression, we observed that they  
161 inhabited a graded continuum of expression states from strongly basal to strongly classical (**Figure 2A**).  
162 Correlation analysis across malignant cells revealed 1,909 genes significantly associated with either  
163 basal or classical expression scores (**Supplemental Figure S2C; Supplemental Table S3; Methods**).  
164 Inspection of these genes revealed that basal cells are defined by squamous and mesenchymal features  
165 and co-express programs associated with transforming growth factor beta (TGF- $\beta$ ) signaling, WNT  
166 signaling, and cell cycle progression (Groger et al., 2012; Kim et al., 2017; Tirosh et al., 2016a).  
167 Conversely, epithelial and pancreatic lineage programs are enriched in classical subtype PDAC cells  
168 (**Supplemental Figure S2D,E**).

169 Strikingly, we observed that the basal and classical programs were not mutually exclusive; rather,  
170 we identified a large population of cells that co-expressed features of both programs to varying degrees  
171 (**Figure 2A; Supplemental Figure S3A,B**). In developmental contexts, cell state commitment is often a  
172 continuous process where mixing/co-expression of state markers indicates state transitions (Nam et al.,  
173 2021). Similarly, the large fraction of intermediate co-expressing cells identified in our single-cell  
174 snapshots suggests state transitions may be an ongoing and frequent process in human PDAC tumors.  
175 We identified 115 genes whose expression was correlated with this co-expressor intermediate state and  
176 enriched for developmental, Ras signaling, and inflammation/stress response gene sets (**Figure 2B;**  
177 **Supplemental Figure S3C,D; Supplemental Table S3; Methods**). Signatures of RAS signaling were  
178 enriched in the intermediate state even compared with basal and classical programs, and, by contrast,  
179 classical phenotypes were enriched for Akt-associated gene sets and showed little evidence of EMT or  
180 RAS enrichments (**Figure 2A-B; Supplemental Figure S2E**).

181 Since this intermediate signature showed enrichment for developmental gene programs, we next  
182 assessed whether this signature overlapped with any phenotypes recently reported in the normal  
183 pancreas progenitor niche (Qadir et al., 2020). We found that both basal and classical gene expression  
184 signatures were expressed by pro-ductal progenitor cells, while the intermediate gene expression  
185 program was enriched in an undifferentiated, stress-responsive progenitor population (**Supplemental**  
186 **Figure S3E,F**) (Qadir et al., 2020). Thus, based on its enrichment for developmental and stress-  
187 responsive gene sets, overlap with populations in the normal progenitor niche, and co-expression of basal  
188 and classical programs suggestive of a transitional state, we termed this phenotype “Intermediate  
189 transitional” (IT) (**Figure 2C**).

190 To further contextualize this cell state, we compared signatures proposed by prior bulk RNA-  
191 sequencing studies to clarify potential inter-relationships (Aguirre et al., 2018; Bailey et al., 2016; Chan-  
192 Seng-Yue et al., 2020; Collisson et al., 2011; Moffitt et al., 2015). Pairwise correlation of all established  
193 signatures in malignant cells revealed that many contribute overlapping information and reflect similar  
194 underlying biology within either basal or classical clades, but that the IT signature is unique and not well  
195 described by established bulk RNA-seq signatures (**Figure 2D**). Taken together, these findings suggest  
196 that malignant PDAC cells organize in a tripartite cell state framework that spans committed basal and  
197 classical phenotypes, with considerable signature co-expression in single cells (**Figure 2E**). Similar to  
198 the variation in EMT scores observed in basal tumor cells (**Supplemental Figure S3A**) (Chan-Seng-Yue  
199 et al., 2020; Connor et al., 2019), we noted heterogeneity among co-expressing cells for the IT program.

200

201 **Multiplex immunofluorescence confirms co-expressing IT cells in metastatic and primary PDAC**

202 To compare to bulk RNA-seq studies, we clustered pseudo-bulk averages of the malignant cells from  
203 each biopsy and observed separation of tumors into those that expressed predominantly basal, classical,  
204 or IT signatures (**Supplemental Figure S3G-I**). However, individual tumors exhibited significant  
205 heterogeneity at the cellular level, with mixing of malignant cell populations expressing at least two and  
206 frequently all three cell states within the same patient specimen (**Supplemental Figure S3J**). To validate  
207 the extensive heterogeneity and the presence of co-expressing IT cells in our metastatic cohort, we used  
208 a subtype-specific multiplex immunofluorescence (mIF) panel to categorize single tumor cells by their  
209 patterns of marker detection in 10 matched cases from our single cell study (**Supplemental Figure S4A**;  
210 **Supplemental Table S4; Methods**). We observed extensive overlap of basal and classical markers  
211 within single cells at the protein level, corroborating the existence of co-expressing IT cells using an  
212 orthogonal method (**Figure 2F; Supplemental Figure S4B**). Encouragingly, we observed significant  
213 correlation within subtype (average  $r = 0.52$ ) as compared to between subtypes (average  $r = 0.06$ ,  $P <$   
214  $10^{-7}$ , Student's T test) using this orthogonal method. We also observed high concordance between the  
215 two methods, giving confidence that we are accurately sampling the distribution of states present in each  
216 sample (average  $r = 0.45$ ; **Supplemental Figure S4C**, white dots). As with scRNA-seq, we observed  
217 mixing of basal, classical, and IT cells within individual patient specimens by mIF subtyping. The  
218 frequency of co-expressing cells was correlated with balanced representation of pure basal and classical  
219 phenotypes within individual samples, consistent with the co-expressing IT phenotype as a transitional  
220 state (**Figure 2G**). Indeed, none of the tumors evaluated with mIF contained a mix of pure basal and  
221 classical phenotypes in the absence of co-expressing IT cells. We also identified co-expressing cells in  
222 primary tumor samples which suggests that IT phenotypes may be a general feature of PDAC tumors in  
223 both the localized and metastatic settings (**Figure 2H; Supplemental Figure S4D**).

224

### 225 **Microenvironment is dominant to *KRAS* amplifications in determining transcriptional subtype**

226 We next searched for potential molecular regulators of the observed tumor cell transcriptional  
227 heterogeneity. In PDAC, the vast majority of tumors harbor clonal *KRAS* point mutations, including all of  
228 the PDAC samples in our cohort (**Figure 1B**). While point mutations in *KRAS* do not appear to determine  
229 transcriptional subtype, several studies have suggested that amplifications in *KRAS* associate with more  
230 basal features (Chan-Seng-Yue et al., 2020; Miyabayashi et al., 2020), while amplifications of lineage  
231 transcription factors like *GATA6* associate with classical phenotypes (Chan-Seng-Yue et al., 2020). To  
232 assess for such genotype-phenotype relationships in our single-cell cohort, we inferred copy number  
233 variation for common PDAC alterations (*KRAS*, *TP53*, *SMAD4*, and *CDKN2A*) and lineage-associated  
234 transcription factors (*HNF4G* and *GATA6*) from scRNA-seq expression data using a previously  
235 established Hidden Markov model workflow (**Methods**) (Fan et al., 2018; Patel et al., 2014; Tirosh et al.,

236 2016b). Encouragingly, we observed a significant association between single-cell inferred *KRAS* copy  
237 number gain and basal phenotypes ( $P < 0.03$  Fisher's exact test), and also between inferred *CDKN2A*  
238 copy loss and IT phenotypes ( $P < 0.003$  Fisher's exact test; **Figure 3A**). While we found that cells derived  
239 from samples with inferred *KRAS* amplifications had a strong preference for the basal subtype, these  
240 cells could still span all three phenotypic categories or be predominantly classical within an individual  
241 tumor (**Figure 3B-D**).

242 To further examine this genotype-to-phenotype association, we tested if *KRAS* amplification was  
243 sufficient to specify the basal phenotype in an *ex vivo* environment. We initiated patient-derived organoid  
244 cultures from matched PDAC biopsies and serially sampled them over time with scRNA-seq (**Figure 1A**).  
245 CNV-confirmed "early" organoid cells (first passage measured,  $n = 2,117$  cells) derived from *KRAS*-  
246 amplified biopsies maintained this genetic alteration in culture (**Figure 3E**, dark red). Despite their genetic  
247 stability, cells with inferred *KRAS* amplifications exhibited a profound phenotypic shift from basal *in vivo*  
248 to classical *ex vivo* (**Figure 3F**). Although selection of specific clones could play a role in this process,  
249 most of these models maintained high CNV similarity to their parent tumor at the early time point. For  
250 example, we observed that a CNV-defined clone from PANFR0575 with both *KRAS* and *GATA6*  
251 amplifications was plastic and shifted from strongly basal *in vivo* to classical in early organoid culture  
252 (**Figure 3G**). These observations provide strong evidence that phenotypic plasticity is an inherent feature  
253 of malignant PDAC cells and demonstrate that *KRAS* amplification alone is not sufficient to lock the basal  
254 state. Furthermore, they suggest that the tumor microenvironment can influence phenotype independent  
255 of genotype in this context.

## 256 257 **Transcriptional heterogeneity is shaped by the microenvironment**

258 Given this strong phenotypic shift even for genetically similar samples, we next examined how *ex vivo*  
259 transcriptional phenotypes differed across our larger organoid cohort relative to their cognate patient  
260 samples. Globally, unbiased comparison of all malignant biopsy (7,078 cells) and organoid cells ( $n = 14$   
261 models, 24,789 cells) revealed unique clusters for each sample and only two clusters that were admixed  
262 by donor. These admixed cells exhibited expression programs consistent with non-malignant stromal  
263 cells, had low overall CNV scores, and dissipated by later passages (**Supplemental Figure S5A-D**;  
264 **Methods**). Overall, samples with high tumor-averaged basal or IT phenotypes exhibited lower rates of  
265 long-term organoid propagation beyond passage 2 than models derived from classical tumors, where the  
266 majority established long-term cultures (**Figure 4A**). When comparing early passage CNV-confirmed  
267 organoids to their cognate patient tissue, culture in an *ex vivo* microenvironment caused greater deviation  
268 in transcriptional phenotype than CNV-defined genotype (**Figure 4A**,  $P < 10^{-6}$  Student's T test; **Methods**).

269 We next assessed which specific tumor cell attributes contributed to phenotypic divergence in the  
270 *ex vivo* microenvironment. As with the *KRAS*-amplified samples, we observed a striking decrease in basal  
271 gene expression ( $P < 0.000001$ ) and, to a lesser but still significant extent ( $P < 0.001$ ), the IT program  
272 (**Figure 4B, top**). By contrast, aggregate classical gene expression remained largely unchanged in  
273 organoid conditions (**Figure 4B, top**). This loss of basal expression was surprising, given the more  
274 clinically aggressive and proliferative nature of basal tumors *in vivo* (**Supplemental Figure S3A**) (Connor  
275 et al., 2019; Moffitt et al., 2015). Organoid-specific gene expression features that were not present *in vivo*  
276 also emerged, including markers of epithelial identity, oxidative stress response pathways (e.g., NRF2  
277 target genes), and amino acid metabolism (hereafter collectively referred to as “organoid-specific” gene  
278 expression; **Figure 4B, bottom; Supplemental Table S5**). In general, models assumed a more classical  
279 or organoid-specific phenotype over time in culture regardless of their parent tumor’s transcriptional  
280 identity (**Figure 4C**). Most models derived from basal or IT tumors exhibited early phenotypic deviation  
281 and cessation of growth within 100 days of initiation (e.g., PANFR0552; **Supplemental Figure S5E**) or  
282 outgrowth of only a sub-clone in culture (e.g., PANFR0489R; **Supplemental Figure S5F**). Classical  
283 tumors, meanwhile, tended to maintain their genotype and phenotype both early in culture and at later  
284 passages (e.g., PANFR0631; **Figure 4C; Supplemental Figure S5G**, clone A).

285 To better understand the contribution of clonal selection to this process, we performed linked  
286 genotype and phenotype assessment from iterative passages. We identified CNV-defined subclones in  
287 the parental biopsy and its associated serial organoid samples, and then assessed how the distribution  
288 of transcriptional states within each subclonal population evolved over time in culture (**Methods**). In both  
289 PANFR0489R and PANFR0575, *KRAS* amplification status remained invariant over time, but we  
290 observed significant phenotypic plasticity and clonal selection in both cases. In PANFR0489R, the  
291 predominantly basal clones *in vivo* rapidly decreased in abundance while other rarer clones with classical  
292 or organoid-specific phenotypes emerged as the dominant ones (**Supplemental Figure S5H**). In  
293 contrast, *in vivo* dominant clones from PANFR0575 were largely maintained at early passages but  
294 diverged significantly in their phenotype, transiently expressing more classical and organoid-specific  
295 phenotypes at passages 2 and 3 before eventually regaining basal transcriptional expression after >100  
296 days in culture (**Supplemental Figure S5I**). Notably, the clones that came to dominate in PANFR0575  
297 organoid culture (clones D and E, **Supplemental Figure S5I**) carried inferred *TP63* amplifications, a  
298 squamous-specifying transcription factor (Somerville et al., 2018), suggesting that certain genotypes,  
299 though rare, may still exert a strong effect despite opposing signals from the microenvironment. Taken  
300 together, these findings emphasize the importance of optimizing culture conditions and performing deep  
301 molecular characterization of patient-derived model systems to ensure faithful representation of the  
302 tumor.



303 Divergence from *in vivo* phenotype, despite relative similarity in genotype, suggested that the  
304 TME has a strong influence in determining PDAC cellular state. For each biopsy-organoid pair, we used  
305 differential expression to nominate transcriptional programs that were present *in vivo* but missing from  
306 *ex vivo* culture (**Figure 4D; Methods**). Broadly, genes preferentially expressed by malignant cells *in vivo*  
307 were related to soluble cytokine signaling, cell-cell communication, and tumor-microenvironment  
308 interactions, highlighting the absence of this crosstalk in organoid culture (**Figure 4E**). Hierarchical  
309 clustering revealed subtype-dependent expression patterns for these *in vivo*-specific genes (**Figure 4F**;  
310 **Supplemental Table S5**). For example, interferon response and EMT genes were significantly  
311 upregulated in basal and IT malignant cells *in vivo* (clusters 1 and 2, **Figure 4F**), while genes associated  
312 with cell-cell interactions and surface glycoproteins were more strongly expressed in IT and classical  
313 cells (cluster 3, **Figure 4F**). Genes related to biological adhesion were more uniform in their expression  
314 across the subtypes (cluster 4, **Figure 4F**). The relative absence of these TME-crosstalk genes in  
315 organoid culture and their differences in expression across transcriptional subtypes *in vivo* suggest that  
316 TME signals may play a role in specifying tumor cell phenotypes.

317

### 318 **Non-malignant composition of the metastatic microenvironment**

319 The presence of TME-associated expression patterns in cancer cells *in vivo* suggested there may be  
320 subtype-dependent structure to, and instructive signaling from, the metastatic TME; however, relatively  
321 little is known about the structure and composition of the metastatic microenvironment in PDAC. We first  
322 analyzed the non-malignant cells (n=14,811) in the metastatic niche to further subclassify cell types and  
323 provide a more complete picture of the immune/stromal composition of metastatic disease (**Figure 5A**).  
324 Sub-clustering of T/NK cells revealed 4 cell types—*CD4+* T, *CD8+* T, NK, and *CD16+* (*FCGR3A+*) NK  
325 cells—each expressing the corresponding established markers (**Supplemental Figure S6A,B**;  
326 **Methods**). Similarly, an unsupervised examination within the monocyte/macrophage compartment  
327 revealed a tripartite continuum for tumor associated macrophages (TAMs), similar to one recently  
328 described in colorectal cancer, comprised of inflammatory *FCN1+* “monocyte-like” TAMs, *C1QC+*  
329 phagocytic TAMs, and *SPP1+* angiogenesis-associated TAMs (**Supplemental Figure S6C,D**;  
330 **Supplemental Table S2**) (Zhang et al., 2020; Zilionis et al., 2019). Representative marker expression  
331 across all previously described non-malignant cells is summarized in **Supplemental Figure S6E**.

332 Although most samples in our cohort were taken from liver metastases (19/23), several originated  
333 from other sites including the omentum, adrenal gland, and peritoneum (**Figure 1B**, “other”).  
334 Interestingly, while we found equal distribution of immune cells among the anatomical sites,  
335 mesenchymal cell populations clustered predominantly by the location of the metastatic lesion (**Figure**  
336 **5B,C**). Excluding adrenal-specific endocrine cells (**Figure 4C**; subset 4, 40 cells), we identified 3



337 mesenchymal subclusters with relatively uniform expression for canonical cancer-associated fibroblast  
338 (CAF) markers (**Figure 5C; Supplemental Figure S6F**). PCA of these cells revealed a continuum of  
339 states along PC2, with uniform expression of the previously described myofibroblast (myCAF) signature  
340 (Elyada et al., 2019; Ohlund et al., 2017) but further separating into cells favoring high expression of  
341 dermal fibroblast-like genes (PC2 low, *FAP*, *PRXX1*, *SFRP2*) or pericyte-like genes (PC2 high, *RGS5*,  
342 *MCAM*, *TBX2*; **Supplemental Figure S6G-I; Supplemental Table S2**) (Ascension et al., 2020;  
343 Bartoschek et al., 2018; Di Carlo and Peduto, 2018; Hosaka et al., 2016; Pelon et al., 2020; Philippeos  
344 et al., 2018). PC3 described a small subset of cells, derived largely from a single tumor (PANFR0489R),  
345 that were highly consistent with the previously established inflammatory fibroblast (iCAF) program  
346 (Elyada et al., 2019; Ohlund et al., 2017) (**Supplemental Figure S6H-J**).

347 While tumors from each location contained both mesenchymal subsets, we noted a strong organ-  
348 specific skewing along PC2 with pericyte-like phenotypes being preferentially associated with liver  
349 biopsies (**Figure 5D,E; Supplemental Figure S6K**). To validate these observations in larger cohorts, we  
350 assessed bulk RNA-seq datasets using these dermal fibroblast- and pericyte-like CAF signature scores  
351 and observed a similar predilection for the pericyte-like expression program in liver metastases (**Figure**  
352 **5F; Methods**). Interestingly, tumors in the pancreas (n = 153 samples) favored expression of the dermal  
353 fibroblast-like program, suggesting a substantially different mesenchymal microenvironment in primary  
354 versus liver metastatic PDAC (**Figure 5F**). Thus, we observed diverse immune and stromal cell types in  
355 the metastatic TME and identified site specific mesenchymal features unique to the liver metastatic niche  
356 compared with primary disease.

357

### 358 **Transcriptional subtypes associate with distinct immune microenvironments**

359 After cataloging the cell types in the metastatic TME, we searched for associations between malignant  
360 subtype and the immune microenvironment. For each tumor sample, we first computed the fractional  
361 representation of each non-malignant cell type per biopsy. Five tumors were excluded from this analysis  
362 on the basis of low cell counts (<200 cells) or indeterminant transcriptional subtype (PanNET or no tumor  
363 cells captured; **Supplemental Figure S6L**). To describe the overall microenvironmental composition for  
364 each tumor, we applied Simpson's diversity index, a measure of biodiversity commonly used in ecology  
365 to describe the number of species (cell types) present in an ecosystem (tumor) and their relative  
366 abundance. We observed that tumors with more classical or IT phenotypes exhibited greater  
367 microenvironmental diversity, while strongly basal tumors had a more homogeneous TME (**Figure 6A**).  
368 Hierarchical clustering over the relative abundance of each non-malignant subset across the biopsy  
369 cohort revealed the specific cell types driving these overall diversity differences (**Figure 6B,C**).  
370 Specifically, C1QC+ TAMs dominated the microenvironments of strongly basal tumors, and both CD8+

371 and CD4+ T cells were significantly depleted in basal contexts compared to the rest of the samples in the  
372 cohort (**Figure 6C,D**). T cells most often originated from biopsies with higher IT malignant fractions  
373 (**Figure 6B,C**) and their abundance was positively correlated with this malignant phenotype in our cohort  
374 (**Figure 6E**). We also broadly observed these patterns within TCGA bulk RNA-sequencing data of other  
375 epithelial malignancies (Cancer Genome Atlas Research et al., 2013), where we observed evidence for  
376 reduced levels of immune-related gene expression in tumors with high basal/squamous gene expression  
377 (**Supplemental Figure S6M**, cluster 4). Taken together, these findings suggest coordinated interactions  
378 between malignant phenotypes and the local TME with decreased immune cell diversity and a greater  
379 degree of immune exclusion associated with basal contexts (**Figure 6F**).

380

### 381 **The soluble microenvironment shapes PDAC cellular phenotypes**

382 Based on our observations that: 1) the microenvironment influences malignant phenotype independent  
383 of genotype; 2) gene expression programs associated with cytokine signaling, EMT, and cell-cell  
384 interaction are enriched *in vivo* but missing from cells cultured as organoids; and, 3) malignant states and  
385 immune cell infiltration are coordinated in a subtype-specific manner, we hypothesized that incorporation  
386 of soluble factors specific to the TME of each transcriptional subtype may drive tumor cell state shifts  
387 (**Figure 7A**). Complete PDAC organoid media (**Supplemental Table S6**) (Boj et al., 2015; Tiriach et al.,  
388 2018) contains various growth factors that could skew malignant transcriptional state, so we first tested  
389 the effects of withdrawing various soluble factors. We cultured four organoid models in media without any  
390 additives (“Minimal” media, containing only Glutamax, anti-microbials, HEPES buffer, and Advanced  
391 DMEM/F12 media; **Figure 7B; Supplemental Table S6; Methods**). We observed a robust increase in  
392 basal gene expression and a decrease in organoid-specific gene expression in specimens cultured for 6  
393 days in minimal media relative to those in complete organoid media (“Complete”, **Figure 7B**). Although  
394 we found that the fraction of cycling cells in minimal media decreased, the organoids continued to grow  
395 under these conditions and exhibited stable CNV profiles, indicating that these responses were unlikely  
396 to be driven by acute selection (**Supplemental Figure S7A,B**). We cultured one model, PANFR0562, in  
397 minimal media for a longer duration and observed that the phenotypic distribution shifted even further  
398 toward IT and basal phenotypes (**Figure 7C**), demonstrating that recovery of all three states is possible  
399 *ex vivo*. Since minimal medium lacks both serum and mitogens to support prolonged cell growth, we also  
400 tested whether culturing organoids in a reduced organoid media formulation (“OWRNA”, complete  
401 organoid media with removal of WNT3A, RSPONDIN-1, NOGGIN, and A83-01; **Supplemental Table**  
402 **S6; Methods**) supported proliferation while allowing expression of basal and IT phenotypes. We found  
403 that organoids maintained under OWRNA conditions began to express basal and IT features while also  
404 strengthening classical gene expression and continuing to proliferate (**Supplemental Figure S7C**).

405 To assess whether these microenvironment-driven effects on transcriptional states were specific  
406 to organoid models or also observed in other cell culture models, we examined PDAC cell lines, as these  
407 are also commonly used to study PDAC biology but are grown in different culture conditions. We  
408 compared bulk RNA expression data from patient tumors (n=219) (Aguirre et al., 2018; Cancer Genome  
409 Atlas Research Network, 2017), our own organoid cohort (n=44), and established cell lines (n=49, CCLE)  
410 (Barretina et al., 2012; Ghandi et al., 2019) and observed strong culture method-dependent phenotypic  
411 skews wherein most organoid models expressed classical phenotypes while cell lines exhibited basal  
412 phenotypes (**Supplemental Figure S7D,E**). This observation suggests neither platform accurately  
413 represents the full repertoire of transcriptional states seen in patients and provides additional evidence  
414 that environmental conditions can profoundly influence transcriptional state. We ruled out the effects of  
415 extracellular matrix dimensionality from media formulation by culturing established 3-dimensional (3D)  
416 organoid models as 2-dimensional (2D) cell lines on tissue culture plastic in the same organoid media—  
417 this had little effect on transcriptional subtype across the models tested (**Supplemental Figure S7F**).  
418 Next, we took each model type (cell lines and organoids) and cultured it in the reciprocal media condition  
419 to ask whether media alone could influence transcriptional subtype. Organoid cells grown in standard  
420 cancer cell line medium (“RP10”, RPMI-1640 with 10% fetal bovine serum) gained expression of basal  
421 programs (**Supplemental Figure S7C**), while CFPAC1 (an established PDAC cell line) lost basal and  
422 classical features and gained organoid-specific gene expression when grown in complete organoid media  
423 (“Complete media”, **Supplemental Figure S7G**). Taken together, these findings demonstrate that the  
424 microenvironment is an instrumental contributor to shaping malignant phenotypes in PDAC. Moreover,  
425 the cell state plasticity suggests the possibility of testing subtype-specific conditions to support the full  
426 repertoire of *in vivo* phenotypes.

427

### 428 **Applying subtype-specific TME signals drives patient-relevant subtype heterogeneity**

429 Finally, we hypothesized that specific factors from subtype-specific TMEs could recover clinically relevant  
430 transcriptional heterogeneity *ex vivo* (**Figure 7A**). *In vivo*, the secreted factor milieu surrounding tumor  
431 cells originates from at least two sources that may influence malignant phenotype: tumor cells themselves  
432 (“autocrine” factors) and non-tumor cells (“paracrine” factors, **Figure 7A**). First, to nominate possible  
433 autocrine signals, we identified tumor cell secreted factors specific to the three subtypes and noted  
434 distinct cytokines expressed by each (**Figure 7D; Supplemental Table S7; Methods**). Since malignant  
435 cells derived from predominantly basal and IT tumors lose their phenotype in organoid culture, we first  
436 tested factors specific to IT and basal states *in vivo*. *TGFB2* was the top differentially expressed secreted  
437 factor shared by tumor cells in both basal and IT TMEs (**Figure 7D**). Organoids cultured with TGF- $\beta$   
438 ligands exhibited a loss of classical expression programs and a near complete shift toward IT and basal

439 phenotypes, matching what we observed *in vivo* (**Figure 7E**). Reemergence of basal phenotypes in both  
440 minimal media (**Figure 7C**), and TGF- $\beta$  conditions (**Figure 7E**) suggest that different types of  
441 microenvironmental pressure can lead to the basal phenotype. Moreover, they suggest that culture  
442 conditions can be tuned to achieve compositional differences spanning pure classical, heterogenous,  
443 and pure basal phenotypes, akin to those seen *in vivo*.

444 Using a similar approach, we next searched for differentially expressed paracrine factors supplied  
445 by the non-tumor cells in the TME from each subtype. Here, we noted an increasing number of  
446 differentially expressed factors in IT and basal contexts, likely reflecting the specific immune cell type  
447 enrichments: TAM and T cell dominant in basal and IT TMEs, respectively (**Figure 6A-C**; **Figure 7F**;  
448 **Supplemental Table S7**). We then mapped each subtype-specific paracrine factor to its cognate cell  
449 type to summarize the overall cell type and secreted factor combinations that shape the subtype-specific  
450 TMEs in metastatic PDAC (**Figure 7G**). Interestingly, we found that *IFNG* originating from *CD8+* T cells  
451 was most highly expressed in the IT TME (**Figure 7F,G**). This was consistent with a relatively higher T  
452 cell fraction in IT tumors (**Figure 6B,F**) and the relative increase in IFN responsive gene expression in IT  
453 and basal tumor cells (**Figure 4E,F**). Given these corroborating correlative data, we directly tested  
454 whether exogenous IFN $\gamma$  could induce transcriptional plasticity towards an IT state. Cells exposed to IFN $\gamma$   
455 showed a dramatic shift toward the IT state with concomitant decrease in expression of classical  
456 signatures (**Figure 7H**). In contrast with exogenous TGF- $\beta$  (**Figure 7E**), microenvironmental IFN $\gamma$   
457 seemed to more specifically induce an IT state, as these cells did not fully transition to basal phenotypes  
458 at later timepoints (**Figure 7H**). These findings demonstrate that the microenvironment plays a critical  
459 role in specifying tumor transcriptional phenotypes and provide evidence for significant PDAC tumor cell  
460 plasticity in response to microenvironmental cues.

461

## 462 **DISCUSSION**

463 Here, by linking single-cell profiling of *in vivo* patient specimens to matched organoid models, we have  
464 built an essential comparative dataset to disentangle the contributions of cell-intrinsic versus -extrinsic  
465 factors to cancer cell transcriptional states in metastatic PDAC. We leveraged the precision afforded by  
466 scRNA-seq to identify a new PDAC cell state that co-expresses the basal and classical programs and  
467 behaves as a transitional intermediate between the basal and classical subtypes. Importantly, the  
468 identification of large fractions of co-expressing IT cells in human tumor biopsies using both mIF and  
469 scRNA-seq suggests interconversion between the classical and basal subtypes occurs frequently in  
470 response to various cues *in vivo* and implies that this intermediate state may be a hallmark of intratumoral  
471 plasticity and tumor cell transcriptional evolution. In fact, in contrast to prior reports (Chan-Seng-Yue et  
472 al., 2020), all tumors that had mixed but discrete populations of basal and classical cells also exhibited

473 proportional fractions of co-expressing IT cells. Our matched organoid studies provide strong evidence  
474 that this extensive transcriptional heterogeneity is heavily influenced by the microenvironment, a finding  
475 that is further reinforced by the identification of subtype-dependent TME structure. As such, this work  
476 provides a detailed description of the PDAC metastatic niche, critical insight into the role of the  
477 microenvironment in determining cancer cell phenotype in PDAC, and a general framework for  
478 discovering and manipulating these relationships across cancer contexts.

479 Although mutations in *KRAS* play a critical role in pancreatic oncogenesis, PDAC cells have also  
480 been shown to adopt more RAS-independent phenotypes as a mechanism of resistance to *KRAS*  
481 suppression (Muzumdar et al., 2017). Our findings help to reconcile these opposing observations by  
482 suggesting that *KRAS* target gene expression is more strongly associated with the IT cell state than either  
483 basal or classical extremes. This finding suggests that while upregulation of *KRAS* signaling by  
484 amplification or other mechanisms may play an important role in the transition toward the basal state  
485 (Chan-Seng-Yue et al., 2020; Miyabayashi et al., 2020), it may become less functionally important once  
486 this state transition is complete. Furthermore, the presence of IT cells enriched for *KRAS* and  
487 inflammatory response gene expression is reminiscent of phenotypes seen in mouse models that suggest  
488 inflamed progenitor-like cells as those that tolerate *KRAS* mutations and initiate tumorigenesis (Alonso-  
489 Curbelo et al., 2021; Li et al., 2021).

490 Our single-cell data support the association between *KRAS* amplifications and the basal state *in*  
491 *vivo*; however, when we compared our matched *KRAS* amplified biopsy and organoid cells, we saw that  
492 this genotype did not lock cells into the basal state, and that microenvironmental conditions were a  
493 dominant factor in determining tumor cell transcriptional subtype. Serial sampling of organoid models  
494 across successive passages demonstrated both phenotypic drift and sub-clonal outgrowth, mirroring the  
495 genetic evolution of PDXs and cell lines in culture (Ben-David et al., 2017; Ben-David et al., 2018), and  
496 highlighting the complex interplay between genetics and microenvironmental influences on transcriptional  
497 plasticity and clonal selection. This facile transition between subtypes has important implications for drug  
498 treatment, and future studies using lineage tracing approaches are needed to better understand the  
499 evolutionary dynamics in this system and how to track and exploit these processes therapeutically.  
500 Additional studies into the epigenetic regulatory mechanisms underlying PDAC state transitions will also  
501 be a critical next step in further delineating the relationships between genotype, microenvironment, and  
502 phenotype.

503 Although we have identified co-expressing IT cells in both primary and metastatic tumors, the  
504 transcriptional programs associated with co-expression may differ between these contexts. We  
505 hypothesize that the basal state may be a common phenotypic endpoint for PDAC tumor cells in response  
506 to microenvironmental stress, with superimposed transcriptional variation depending upon the specific



507 stressors a given tumor cell must overcome to reach this state. Supporting this concept is the observation  
508 that cells exhibiting basal phenotypes show concomitant expression of EMT, IFN response, or hypoxia  
509 response signatures, and these expression patterns may be driven by the specific microenvironment  
510 (Benci et al., 2016; Connor et al., 2019). In addition, our finding that diverse microenvironmental signals,  
511 including nutrient deprivation (“Minimal media”), autocrine and stromal signals (TGF- $\beta$ ), and immune  
512 signals (IFN $\gamma$ ), induce the transition away from the classical subtype further supports this conclusion. We  
513 postulate that IT intermediates likely house similar context-dependent complexity depending on the tissue  
514 of residence.

515         Similar to malignant cells, the non-malignant cell types in the metastatic TME were varied in  
516 phenotype and overall composition. Although we mainly sampled liver metastases, we identified strong  
517 differences between mesenchymal populations from different biopsy sites. We observed that the liver  
518 metastatic niche was enriched for pericyte-like myofibroblasts (Bartoschek et al., 2018; Di Carlo and  
519 Peduto, 2018; Hosaka et al., 2016; Pelon et al., 2020), while other sites of metastasis and primary disease  
520 were enriched for dermal fibroblast-like phenotypes. Given the pivotal role that has been suggested for  
521 the fibrotic TME in primary disease (Ho et al., 2020; Sahai et al., 2020), these findings carry important  
522 implications for targeting the stromal compartment in primary versus metastatic PDAC. For example,  
523 inhibitors targeting FAP have recently shown preclinical efficacy (Fabre et al., 2020), but we observe FAP  
524 expression favors dermal fibroblast-like cells but not pericyte-like myofibroblasts which are more  
525 prevalent in liver metastases. As such, examination of these fibroblast phenotypes across larger sample  
526 sets may help to identify additional clinically relevant variation in tumor-fibroblast crosstalk, and site-  
527 specific combinatorial strategies may be needed to effectively target the PDAC tumor stroma.

528         We show how scRNA-seq can be employed to define the structure of the metastatic niche and  
529 uncover formerly unappreciated relationships between tumor transcriptional phenotype and the local  
530 TME. Although traditionally thought of as a uniformly “immune-cold” tumor, our findings highlight that the  
531 immune microenvironment in metastatic PDAC harbors a layer of complexity closely linked to tumor cell  
532 transcriptional subtype that may provide new avenues for therapeutic targeting. Notably, we observed  
533 high levels of *IFNG* expression by CD8<sup>+</sup> T cells and coordinated elevation in IFN response gene  
534 expression in IT and basal malignant cells. We recapitulated this shift from a classical to a more IT state  
535 in organoid models exposed to IFN $\gamma$ , suggesting that malignant adaptation to signals from the TME may  
536 contribute to driving IT and basal phenotypes. Similar to the relationship between inflammation and  
537 tumorigenesis (Alonso-Curbelo et al., 2021; Li et al., 2021), we speculate that as tumors become inflamed  
538 and immune-activated, malignant cells display enhanced plasticity, transition to an IT state in response,  
539 and then progress to a fully basal phenotype with concomitant immune evasion and exclusion. These  
540 relationships may have implications for PDAC response to immunotherapy given that a productive



541 immune response may promote more aggressive basal phenotypes (Benci et al., 2016; Li et al., 2018).  
542 Notably, we observed evidence for basal expression signatures with a corresponding paucity of immune  
543 cell type signatures in multiple other epithelial cancers, suggesting that coordination of malignant and  
544 immune responses in basal contexts may be a broadly relevant phenomenon across many cancer types.  
545 Additional studies with co-culture, mouse models, or serial samples from patients on active  
546 immunotherapy may further clarify these coordinated and reciprocal tumor-immune interactions.

547 More generally, our approach using matched *in vivo* malignant populations as a reference for *ex*  
548 *vivo* perturbations and model generation provides a critical framework for understanding the signals that  
549 drive clinically relevant phenotypes but are missing from organoid and cell line cultures. The genetic  
550 evolution of *ex vivo* models is a well-established phenomenon which carries functional consequences  
551 (Ben-David et al., 2019; Ben-David et al., 2018). Our study highlights similar *ex vivo* evolution for  
552 transcriptional variation, but also provides a strategy to rescue malignant phenotypes by re-introduction  
553 of soluble signals needed for their support *in vivo*. This approach may offer a more tractable system for  
554 state-specific high throughput screening compared with more complex heterotypic co-cultures or PDX  
555 systems. With a catalogue of matched *in vivo* phenotypes as a reference, this workflow empowers not  
556 only model fidelity, but enhances our ability to learn the phenotypic boundary conditions for individual  
557 tumors. For example, we can begin to define whether certain pressures induce cell state transitions in  
558 specific subsets of *ex vivo* models and identify which combinations of factors impede or synergistically  
559 enhance these transitions. Furthermore, these studies highlight how model generation in different growth  
560 contexts—organoids, cell lines, spheroids—may lead to the identification of emergent tumor cell  
561 properties. Learning these rules across different tumor contexts and understanding which non-malignant  
562 cell types participate *in vivo* would allow for the full appreciation of the symbiotic relationships within tumor  
563 ecosystems and provide a valuable foundation for leveraging microenvironmental manipulation to control  
564 tumor cell phenotype and behavior.

565 In sum, our data demonstrate coordinated phenotypic evolution driven by reciprocal interactions  
566 between malignant cells and the TME in PDAC. Just as we consider therapeutic combinations to target  
567 tumor cell intrinsic properties, paracrine interactions with the TME may equally drive tumor cell phenotype  
568 and thus require consideration in designing combination strategies. We provide a framework for relating  
569 malignant cells, the TME, and patient-derived model systems that may be applicable in other tumor types  
570 with clinically relevant transcriptional variation across the malignant and microenvironmental  
571 compartments.

572

573 **ACKNOWLEDGEMENTS**

574 We thank the study participants and their families for enabling this research. This work was funded by  
575 the Lustgarten Foundation Dedicated Laboratory Program (B.M.W., A.J.A.), Dana-Farber Cancer  
576 Institute Hale Center for Pancreatic Cancer Research (A.J.A., B.M.W., W.C.H.), the Doris Duke  
577 Charitable Foundation (A.J.A.), Pancreatic Cancer Action Network (A.J.A., B.M.W.), NIH-NCI K08  
578 CA218420-02 (A.J.A.), P50 CA127003 (A.J.A., B.M.W.), U01 CA176058 (W.C.H.), U01 CA224146  
579 (W.C.H., A.J.A.), U01 CA210171 (B.M.W.), U01 28020510 (W.C.H., A.K.S.), 1U2CCA23319501 (A.K.S.),  
580 U54 CA217377 (W.C.H., S.R.M., A.K.S.), U01 CA250549 (W.C.H., S.R., A.J.A.), Stand Up To Cancer  
581 (B.M.W.), Noble Effort Fund (B.M.W.), Wexler Family Fund (B.M.W.), Promises for Purple (B.M.W.),  
582 Hope Funds for Cancer Research Postdoctoral Fellowship (S.R.), Harvard Catalyst/The Harvard Clinical  
583 and Translational Science Center UL1 TR002541 (S.R.), Koch Institute for Integrative Cancer Research  
584 at MIT and the Dana-Farber/Harvard Cancer Center Bridge Project (W.C.H., S.R.M., S.R.), Dana-Farber  
585 Cancer Institute Gloria Spivak Faculty Advancement Fund (S.R.), Hopper-Belmont Foundation  
586 Inspiration Award (S.R.), Marcotte Center for Cancer Research (B.E.J.), Finnish Cultural Foundation  
587 (S.A.V.), Orion Research Foundation sr (S.A.V.), Broman Family Fund for Pancreatic Cancer Research  
588 (K.N.), Ludwig Center for Molecular Oncology at MIT (A.W.N.), Searle Scholars Program (A.K.S.),  
589 Beckman Young Investigator Program (A.K.S.), Sloan Fellowship in Chemistry (A.K.S.), and the Pew-  
590 Stewart Scholars Program for Cancer Research (A.K.S.). We also thank Bryan Bryson for helpful  
591 discussions of macrophage phenotypes.

592

593 **AUTHOR CONTRIBUTIONS**

594 S.R., P.S.W., B.M.W., W.C.H., A.J.A., and A.K.S. conceived and led the study. S.R., P.S.W., A.W.N.,  
595 H.L.W., R.L.K., J.G.R., K.E.L., N.M., M.S.R., R.W.S.N., J.W., I.W., A.R., and E.S. designed and  
596 conducted experiments. S.R., P.S.W., A.W.N., H.L.W., A.D., A.A.B., K.S.K., A.M.J., L.F.S., Y.Y.L.,  
597 A.D.C., and J.M.M. analyzed and interpreted data. S.A.V., A.D.C., E.R., D.R., L.K.B., A.R., A.M.J., T.E.C.,  
598 K.P., D.A.R., K.N., J.M.C., and J.A.N. contributed patient samples, clinical data, and intellectual input.  
599 B.E.J., T.J., L.C., J.A.N., S.R.M., B.M.W., W.C.H., A.J.A., and A.K.S. supervised aspects of the project.  
600 S.R. and P.S.W. wrote the manuscript with input from A.W.N., H.L.W., S.R.M., B.M.W., W.C.H., A.J.A.,  
601 and A.K.S. and review by all other co-authors.

602

603 **DECLARATION OF INTERESTS**

604 B.M.W. reports research support from Celgene, Eli Lilly and consulting for BioLineRx, Celgene, G1  
605 Therapeutics, GRAIL. W.C.H. is a consultant for Thermo Fisher, Solasta Ventures, MPM Capital, Tyra  
606 Biosciences, iTeos, Frontier Medicines, KSQ Therapeutics, Jubilant Therapeutics, RAPPTA

607 Therapeutics, and Paraxel. A.K.S. reports compensation for consulting and/or SAB membership from  
608 Merck, Honeycomb Biotechnologies, Cellarity, Cogen Therapeutics, Orche Bio, and Dahlia Biosciences.  
609 A.J.A. has consulted for Oncorus, Inc., Arrakis Therapeutics, and Merck & Co., Inc, and has research  
610 funding from Mirati Therapeutics, Deerfield, Inc. and Novo Ventures that are unrelated to this project.  
611 S.R.M. is a founder of Travera. J.M.C. has received research funding from Merck, Tesaro, AstraZeneca,  
612 Bayer, and Esperas Pharma, has served as a consultant to Bristol Myers Squib, and has received travel  
613 funding from Bristol Myers Squib. A.R. is an employee of AstraZeneca and an equity holder in Celsius  
614 Therapeutics and NucleAI. Y.Y.L. reports equity from g.Root Biomedical Services. A.D.C. reports  
615 research support from Bayer. K.N. reports research support from Revolution Medicines, Evergrande  
616 Group, Genentech, Gilead Sciences, Celgene, Trovagene, Pharmavite, and Tarrex Biopharma, is a  
617 member of SABs for Bayer, Seattle Genetics, and Array Biopharma, and has consulted for X-Biotix  
618 Therapeutics.

# Figure 1

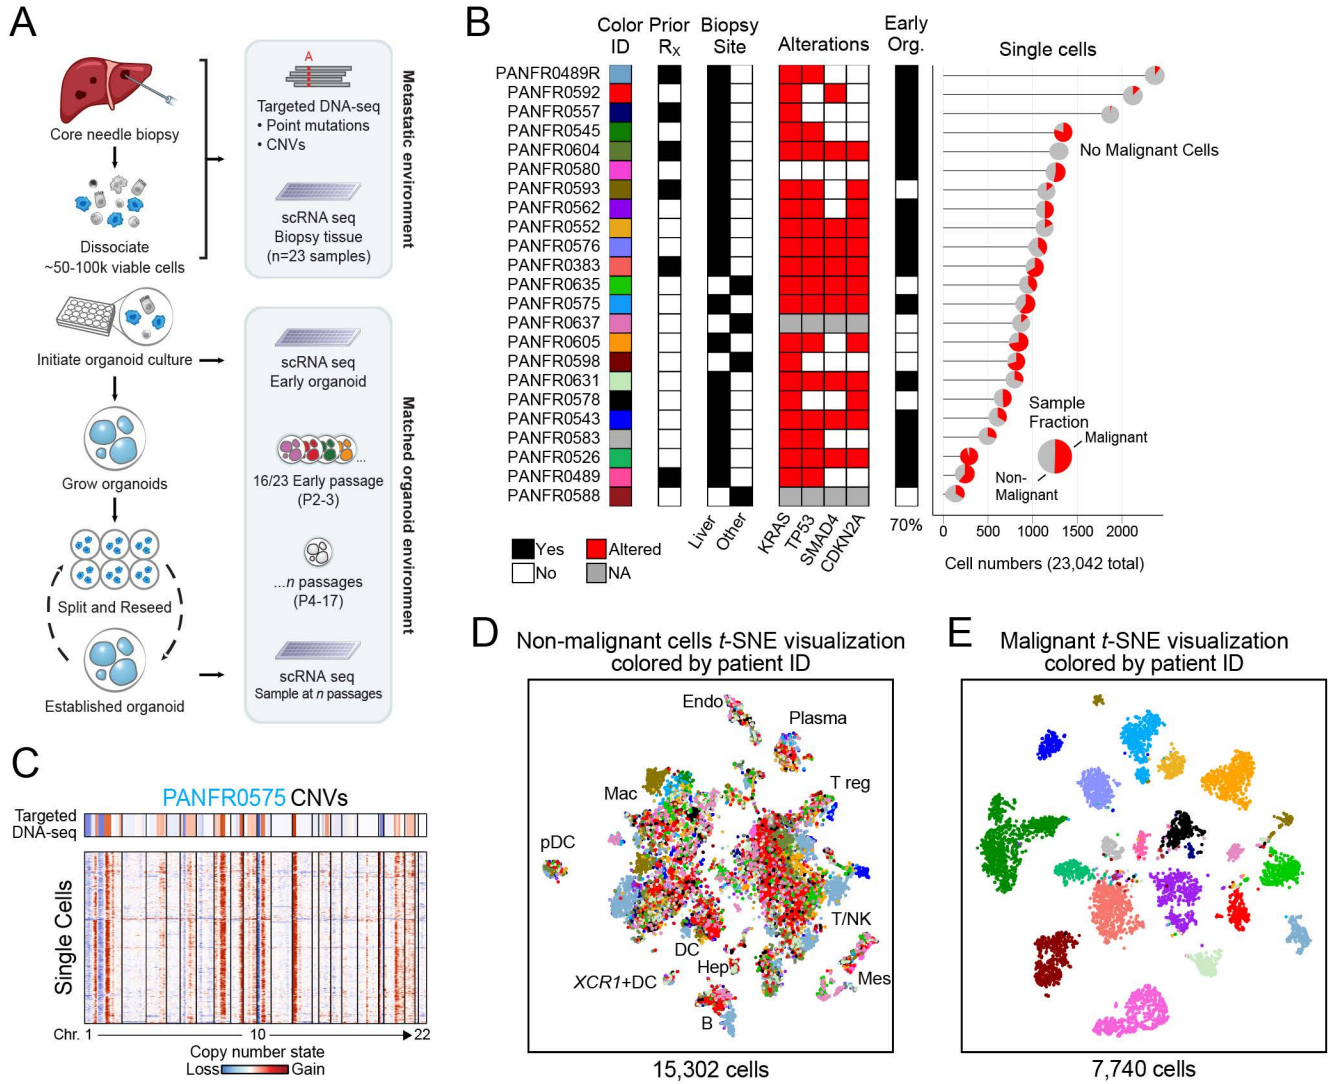

619 **Figure 1. A clinical pipeline for matched single-cell RNA-seq and organoid generation from**  
620 **metastatic PDAC biopsies.**

621 **(A)** Pipeline for collecting patient samples, and dissociation and allocation for scRNA-seq and parallel  
622 organoid development.

623 **(B)** Clinical and molecular features for all patients included in the dataset ( $R_x$  = Therapy; Other = Adrenal  
624 (PANFR0637), Omentum (PANFR0635, PANFR0598), Peritoneum (PANFR0588); Org. at P2 =  
625 Organoid measured at passage 2). Mutations were determined by bulk targeted DNA-seq (Red, Altered;  
626 White, wildtype; Grey, Data not available). Number of single cells captured per biopsy and their malignant  
627 and non-malignant fraction is visualized at the right.

628 **(C)** Example bulk targeted DNA-seq (top) and single-cell inferred CNV profiles (rows, bottom) arranged  
629 by chromosome (columns) from PANFR0575.

630 **(D-E)** *t*-distributed stochastic neighbor embedding (*t*-SNE) visualization for non-malignant **(D)** and  
631 malignant **(E)** single cells in the biopsy cohort. Cells are colored by patient as in **B**. Endo, Endothelial;  
632 Mes, Mesenchymal; B, B-cell; Hep, Hepatocyte; DC, Dendritic cell; pDC, Plasmacytoid dendritic cell;  
633 Mac, Macrophage; T, T-cell; NK, Natural killer cell.

634

635 *See also Supplemental Figures S1 & S2; Supplemental Tables S1 & S2.*



## Figure 2

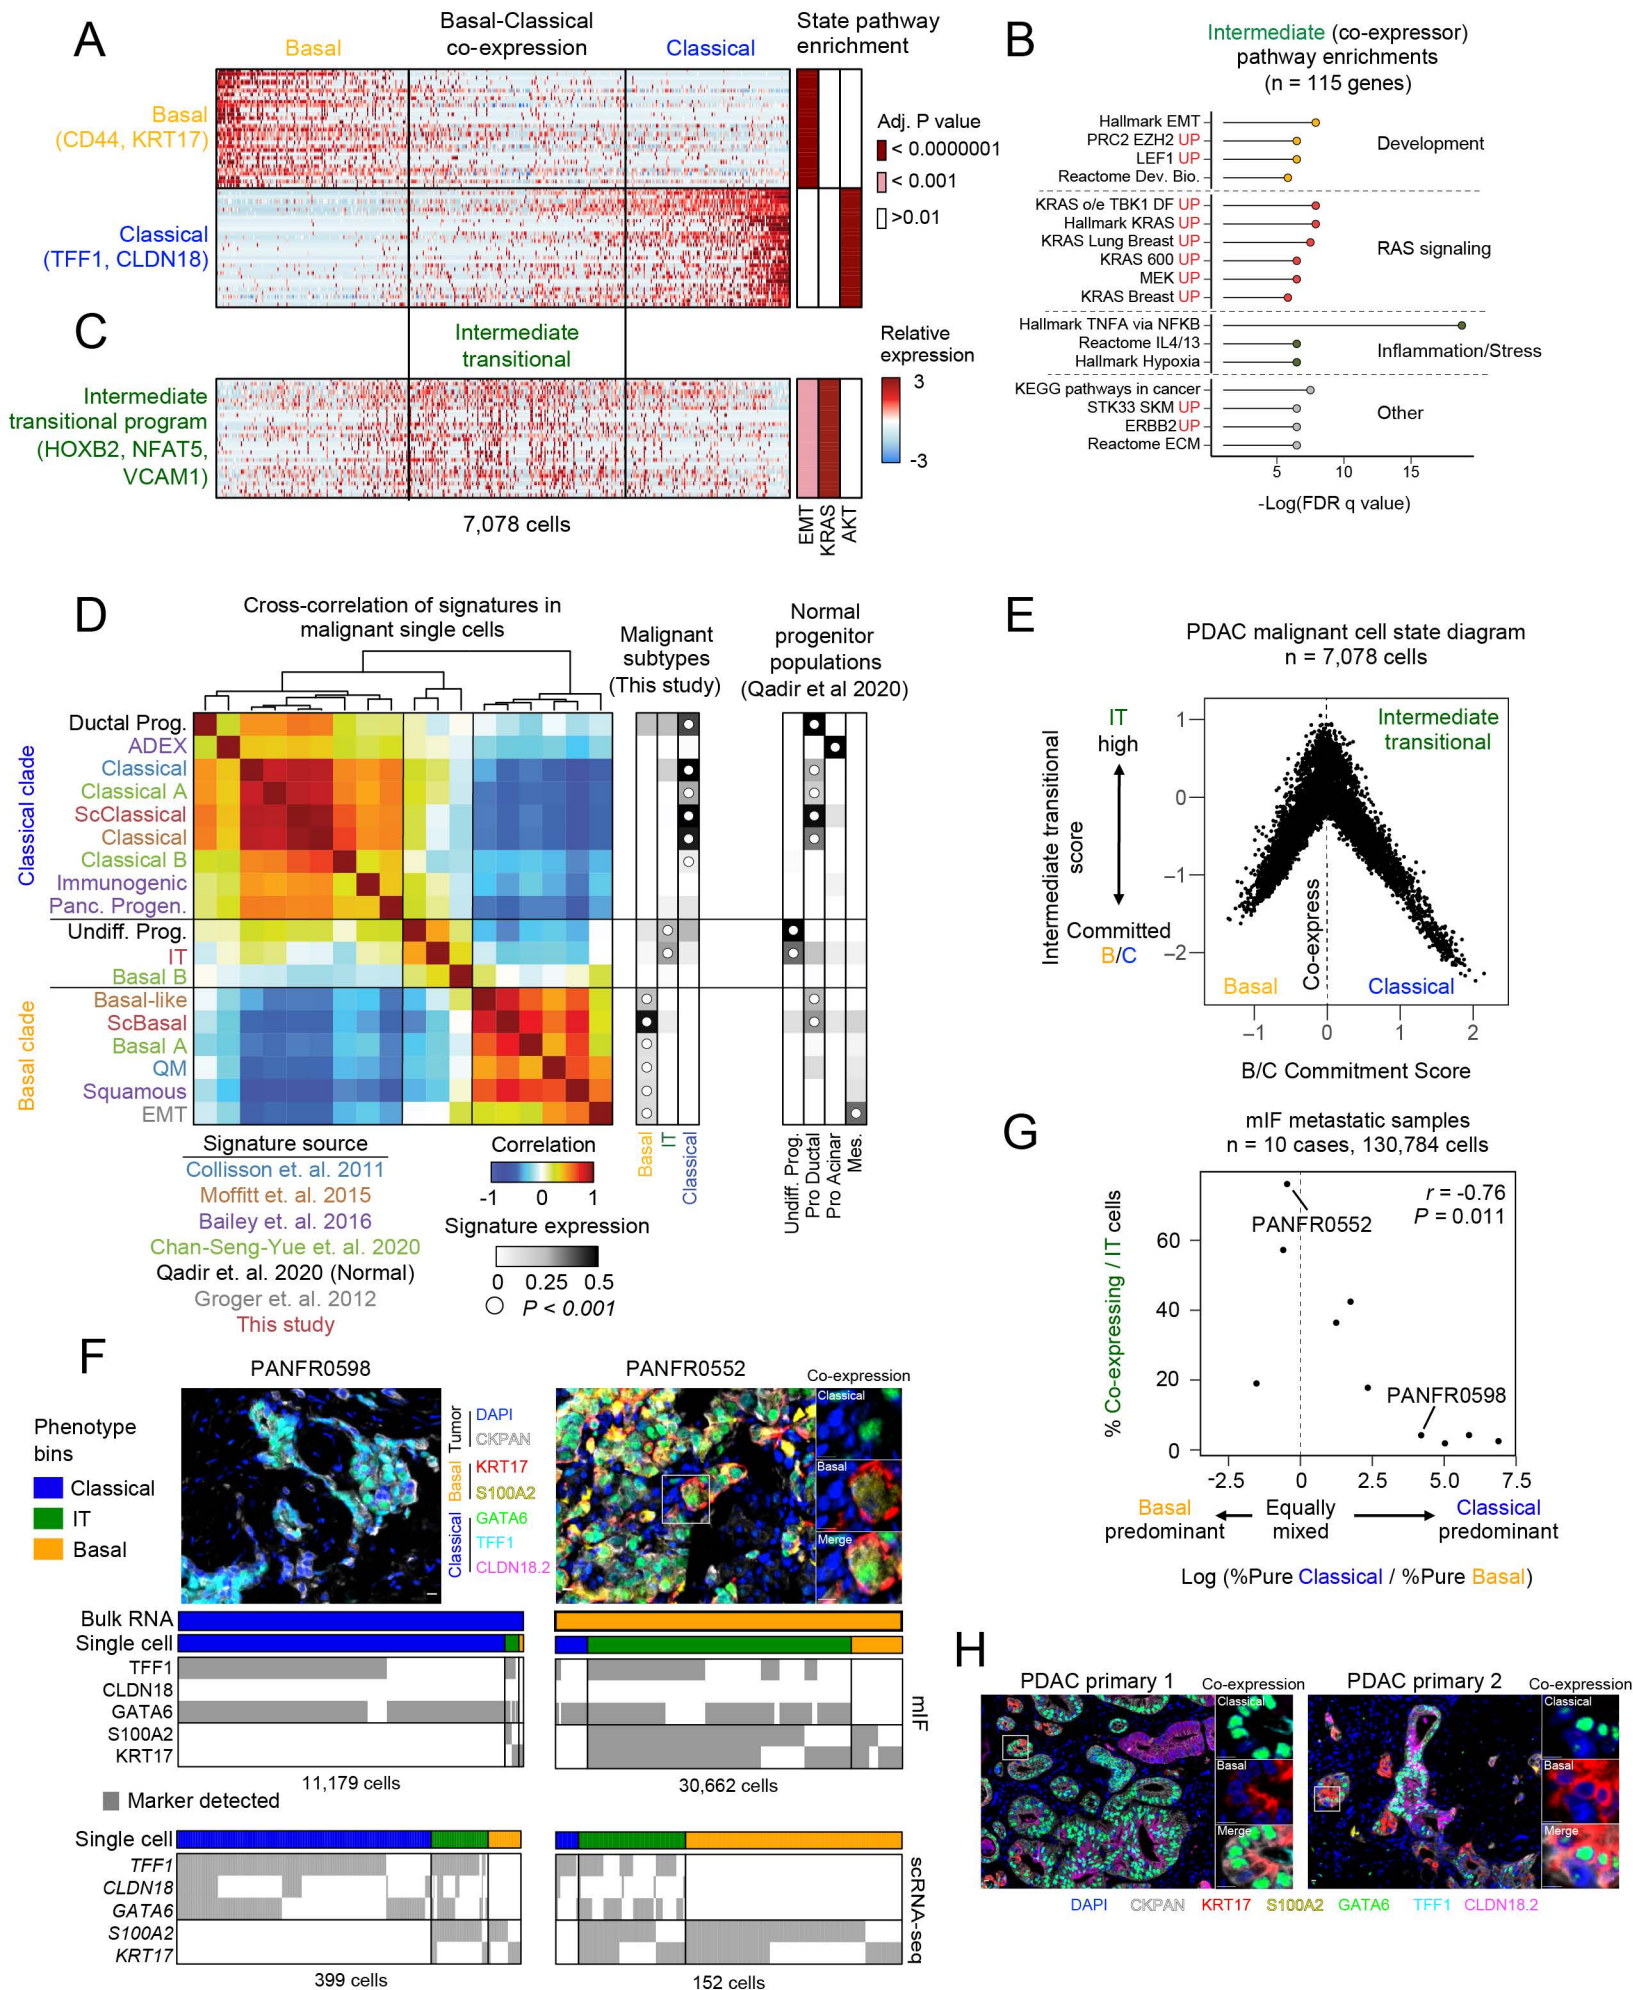



636 **Figure 2. An intermediate transitional state bridges basal and classical phenotypes.**  
637 **(A)** Heatmaps depict the expression of basal and classical expression programs and highlight the co-  
638 expressing intermediates (n=30 genes each).  
639 **(B)** Gene set enrichment analysis for the 115 genes specific to the co-expressing intermediate state.  
640 **(C)** The intermediate transitional (“IT”) expression program (n = 30 genes) is enriched by co-expressing  
641 cells. Enrichment adjusted *P*-values (hypergeometric test) for EMT, *KRAS*, and *AKT* gene sets are  
642 indicated at right for each gene expression program in **A** and **C**.  
643 **(D)** Cross-correlation between new and previously proposed expression signatures (rows and columns;  
644 text color = source, below) in our PDAC single-cells. Average expression for each signature (rows) is  
645 shown at the right for cells in the malignant subtypes from our cohort and the normal pancreatic progenitor  
646 cells from Qadir et al., 2020. White dot indicates the subset with the highest average significant  
647 expression for each signature (Kruskal-Wallis test); no white dot indicates no significant expression.  
648 **(E)** Malignant cell state diagram for PDAC. Basal-classical commitment score (x axis) and IT score (y  
649 axis) for all 7,078 malignant cells (**Methods**).  
650 **(F)** Multiplex immunofluorescence analysis (mIF) identifies co-expressing IT cells in matched metastatic  
651 samples. Top are representative images from two cases (white box indicates region for co-expression  
652 insets at right), and bottom indicates marker detection patterns for mIF and matched scRNA-seq data  
653 (**Methods**). Scale bar represents 10  $\mu\text{m}$ .  
654 **(G)** Frequency of co-expressing IT cells is correlated with balanced representation of pure basal and  
655 classical phenotypes by mIF within individual samples. Log ratio of % basal and classical cells in each  
656 sample (x axis) versus their % co-expressing / IT cells (y axis).  
657 **(H)** Co-expressing IT cells are also identified in primary PDAC samples by mIF. Scale bar represents 10  
658  $\mu\text{m}$ .  
659  
660 *See also Supplemental Figures S2, S3 & S4; Supplemental Tables S3 & S4.*

# Figure 3

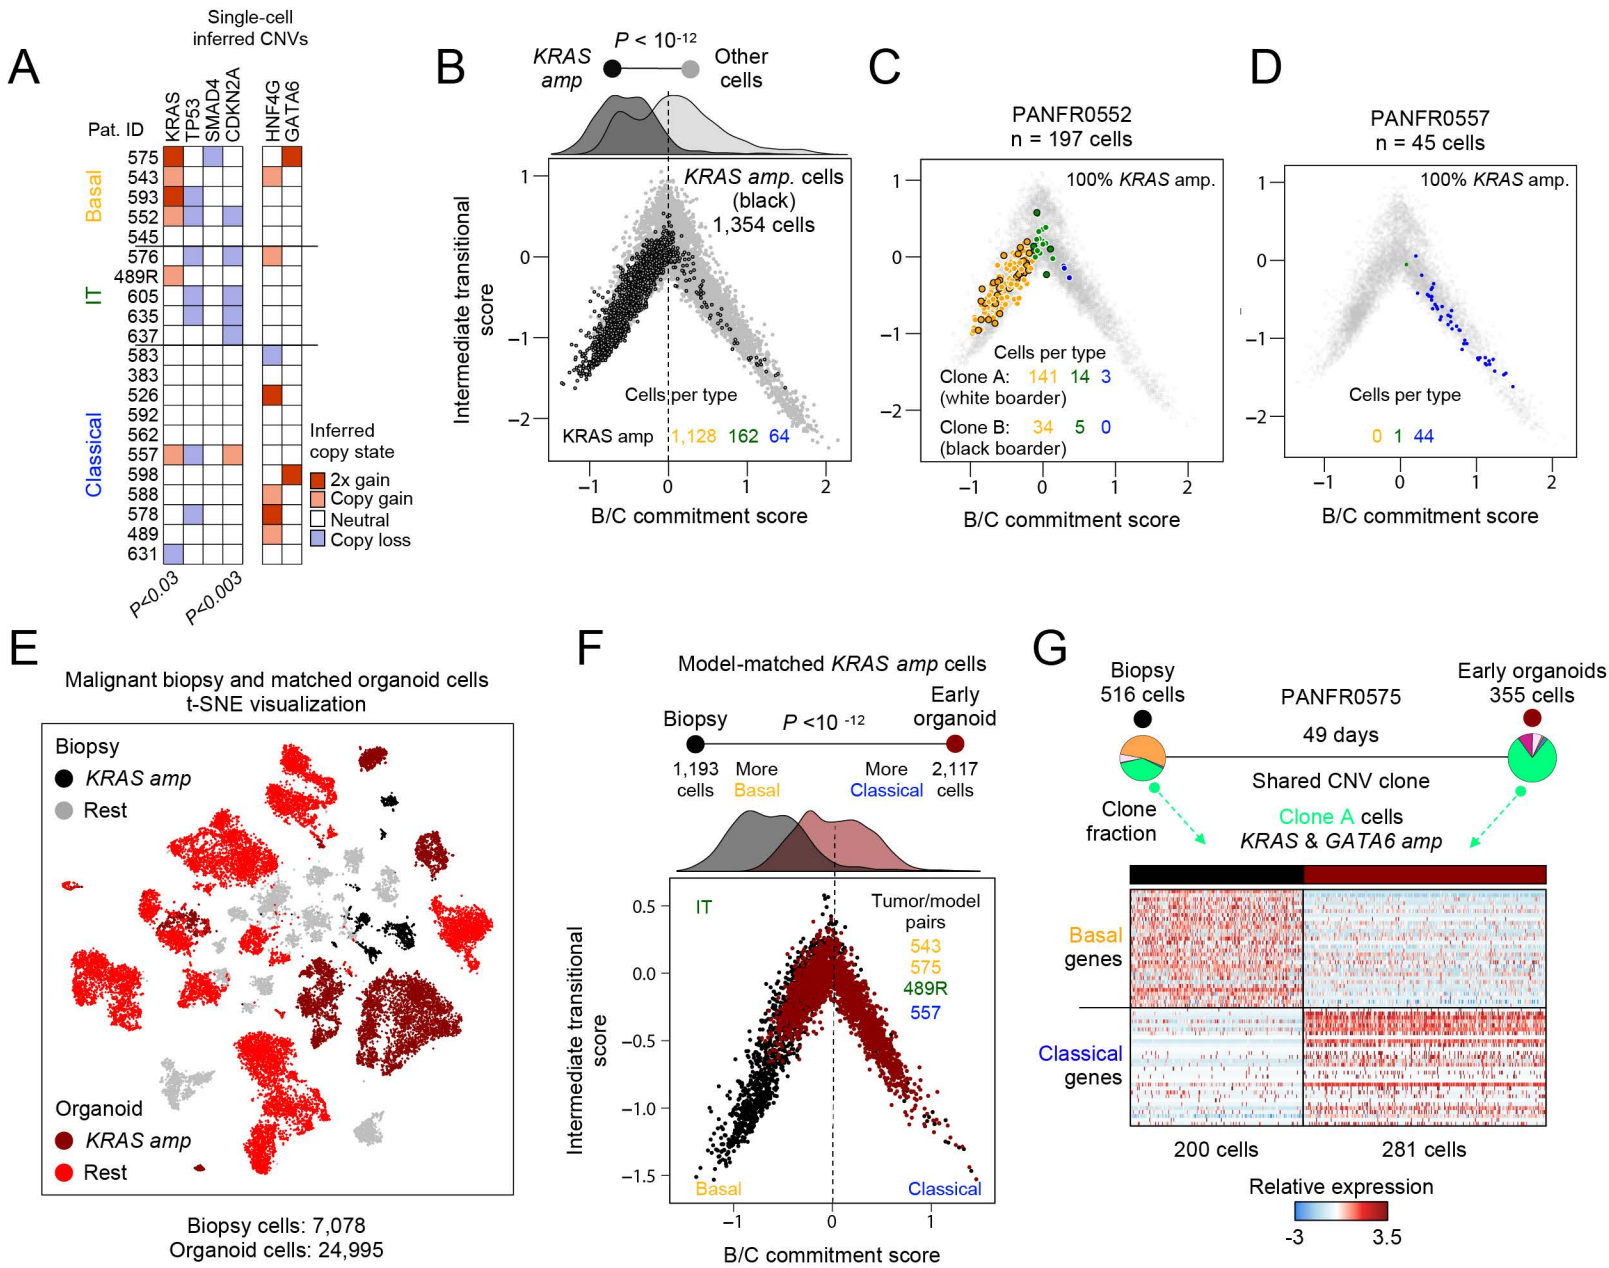

661 **Figure 3. Microenvironment dictates phenotype in *KRAS*-amplified tumor cells.**

662 **(A)** Single-cell inferred copy number alterations for each sample in the biopsy cohort (**Methods**). Tumors  
663 are grouped by expression of their dominant subtype based on the clustering in **Supp. Fig. S3G**, *P*-  
664 values comparing presence of each alteration among the groups (Basal, Classical, IT) are determined  
665 by Fisher's exact test.

666 **(B)** Malignant cell state diagram as in **Figure 2E** but highlighting all *in vivo* *KRAS*-amplified tumor cells  
667 (black border) across the states.

668 **(C)** Similar to **B**, but highlighting PANFR0552 *KRAS*-amplified malignant cell heterogeneity. White and  
669 black borders correspond to separate CNV sub-clones (both *KRAS* amplified) and color fill denotes  
670 transcriptional subtype.

671 **(D)** Similar to **B**, but highlighting PANFR0557 *KRAS*-amplified malignant cell heterogeneity. Color fill  
672 denotes transcriptional subtype.

673 **(E)** *t*-SNE visualization of all biopsy (grey and black) and matched organoid cells (red and dark red) from  
674 iterative passages. *KRAS*-amplified tumor cells from *in vivo* specimens (black) and organoid models (dark  
675 red) are highlighted with distinct colors.

676 **(F)** Cell state diagram for all cells with inferred *KRAS* amplifications in biopsy (grey) and organoid (red)  
677 microenvironments. *P*-value compares biopsy versus early passage organoid score distributions (top  
678 density) and was determined by student's T test.

679 **(G)** Clonal fractions (pie charts) from the *KRAS*-amplified PANFR0575 sample in biopsy and organoid  
680 conditions. Heatmap shows the relative expression in single cells from plastic clone A (bright green) in  
681 both conditions.



# Figure 4

**A**

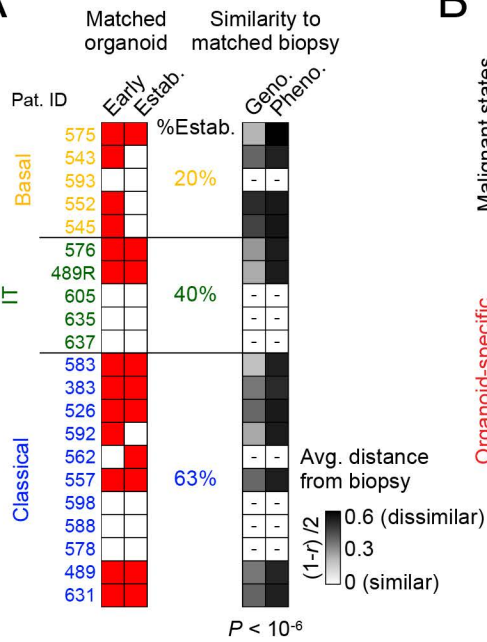

**B**

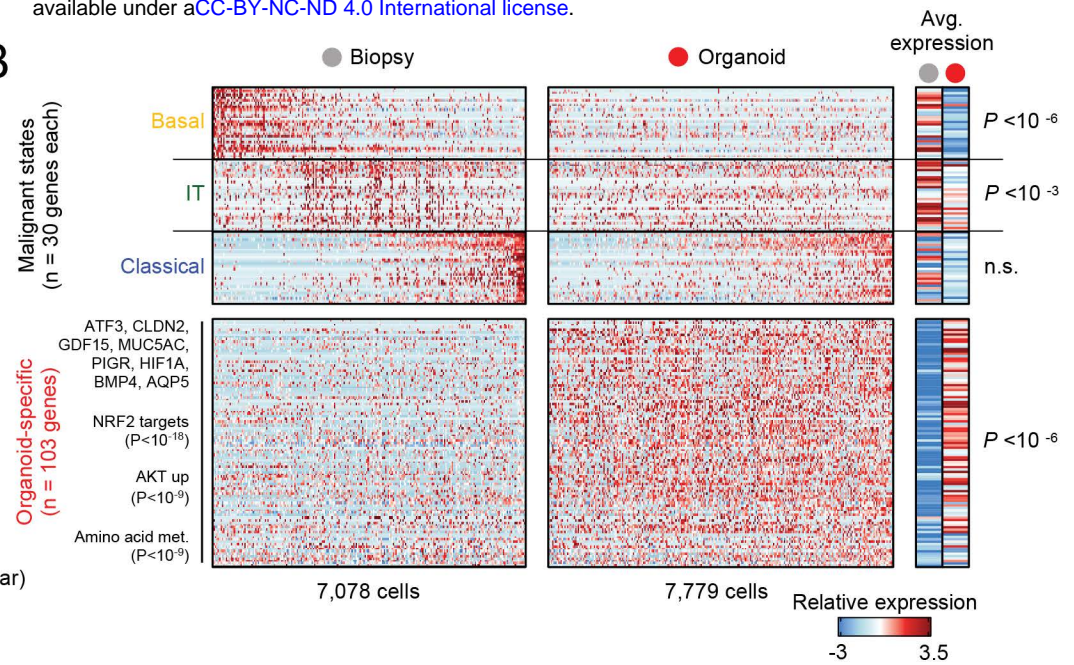

**C**

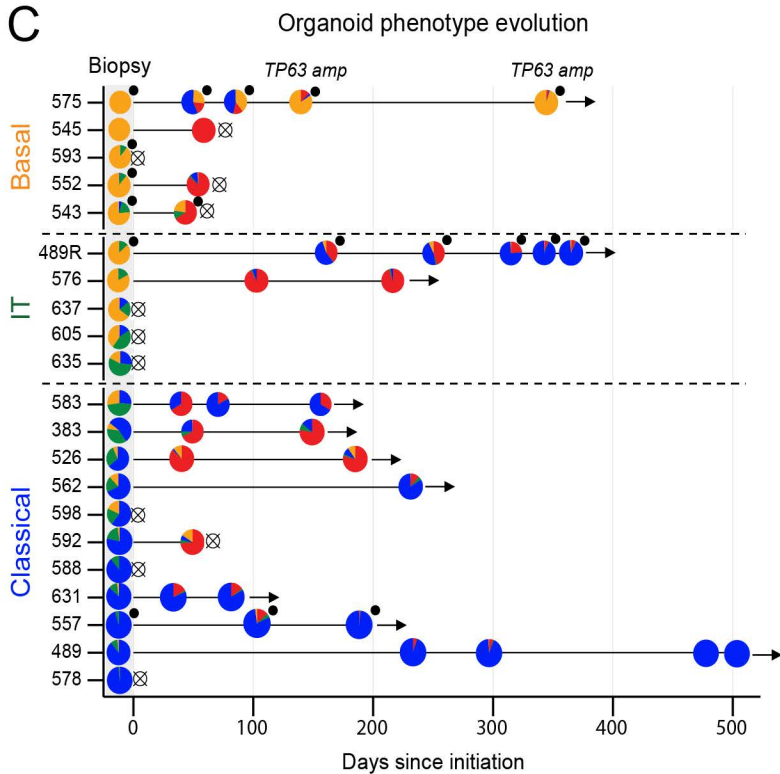

**D**

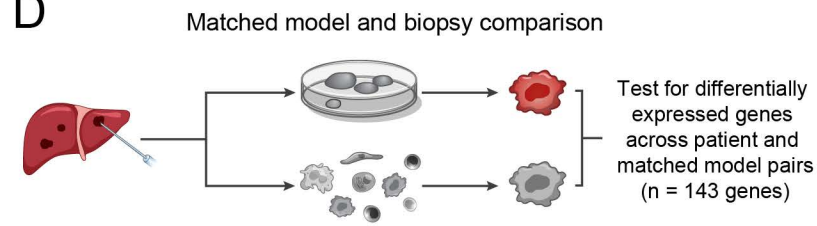

**E**

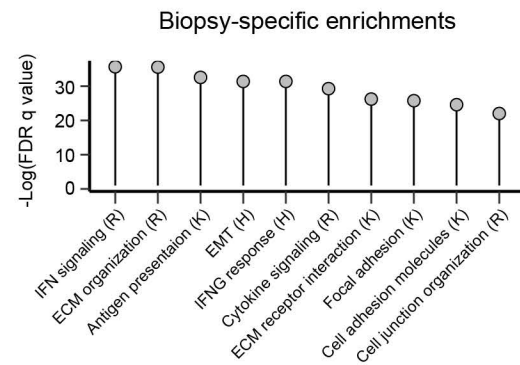

**F**

Biopsy-specific differentially expressed genes

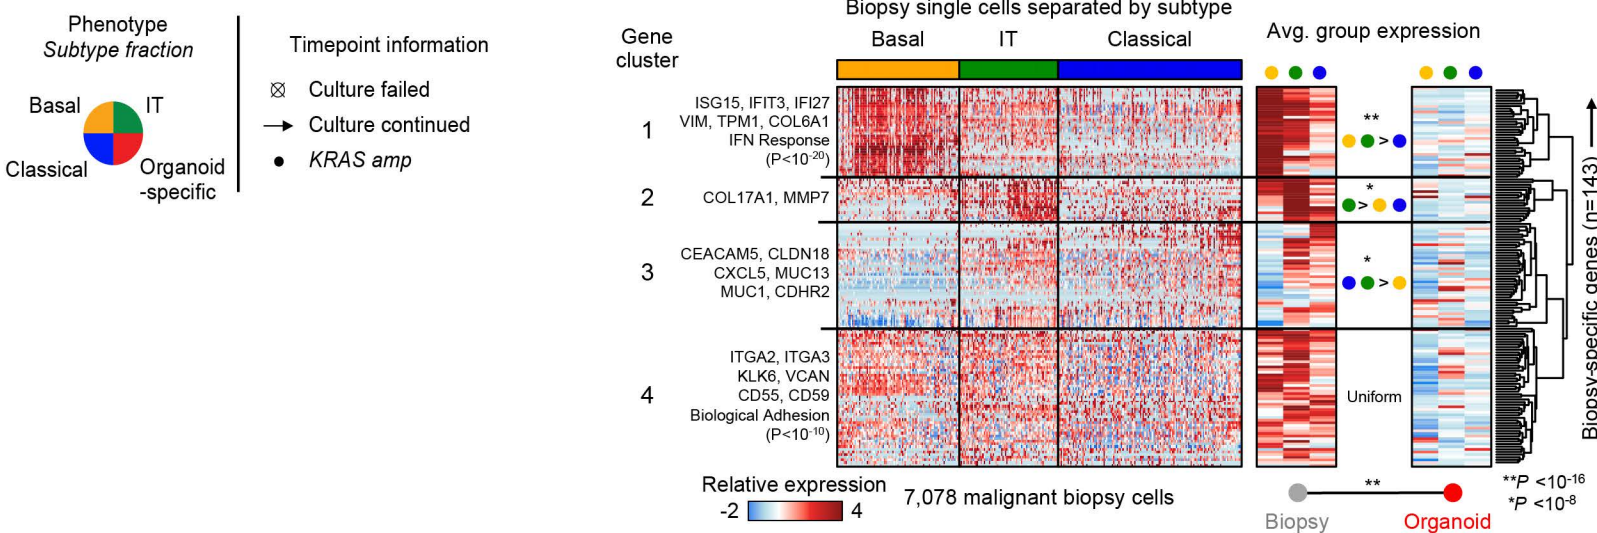

682 **Figure 4. Organoid culture microenvironment selects against the basal state with phenotypic**  
683 **evolution over time.**

684 **(A)** Sampling from each model initiated as an organoid. Red fill represents measurements at an Early  
685 time point and if that biopsy established a long-term culture (Estab.). Right grey scale heat indicates the  
686 distance (**Methods**) between each biopsy-early organoid pair for CNVs (Geno.) or transcriptional subtype  
687 (Pheno.). *P*-value for Geno. vs Pheno. differences determined by student's T test.

688 **(B)** Relative expression for the malignant programs (top) and organoid-specific genes (bottom) in biopsy  
689 cells (left) and their matched, early passage organoid cells (n=13 models; right). Parenthetical *P*-values  
690 (left) indicate hypergeometric test for enrichment of pathways in the indicated gene clusters. Far right  
691 heat is average expression for all genes in each group, *P*-values determined by student's T test.

692 **(C)** Swimmer's plot shows the evolution of organoid phenotype in the culture microenvironment. Each  
693 point indicates a passage when organoids were sampled with scRNA-seq, and pie chart fill indicates the  
694 fraction of single cells binned as each transcriptional subtype.

695 **(D)** Schematic for matched tumor-organoid differential expression analysis.

696 **(E)** Top differentially expressed genes *in vivo* (143 genes) are TME-associated and enrich for TME-  
697 associated pathways. All top enrichments shown are highly significant (*P*-value < 10<sup>-12</sup>).

698 **(F)** Hierarchical clustering in biopsy cells (columns) of the relative expression for the 143 TME-associated  
699 genes preferentially expressed *in vivo* (rows). Cells are binned in the single-cell heatmap and the  
700 averages at right by their originating tumor's average transcriptional subtype. Gene-level averages are  
701 split by biopsy (left) and organoid cells (right). Parenthetical *P*-values (left) indicate hypergeometric test  
702 for enrichment of pathways in the indicated gene clusters. For within-group differences in expression for  
703 biopsy averages, *P*-values are computed by one-way ANOVA followed by Tukey's HSD and compare  
704 averaged expression of each gene cluster between cells from different biopsy subsets (middle heatmap;  
705 \**P*-value < 10<sup>-8</sup>; \*\**P*-value < 10<sup>-16</sup>). Overall biopsy versus organoid average expression difference for all  
706 143 genes is determined by Student's T test.

707

708 *See also Supplemental Figure S5; Supplemental Table S5.*

709

710



# Figure 5

**A**

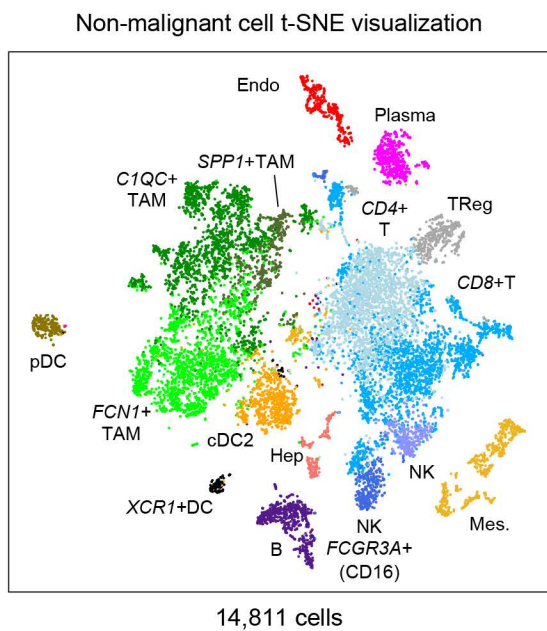

**B**

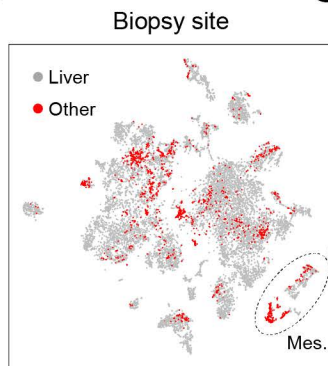

**C**

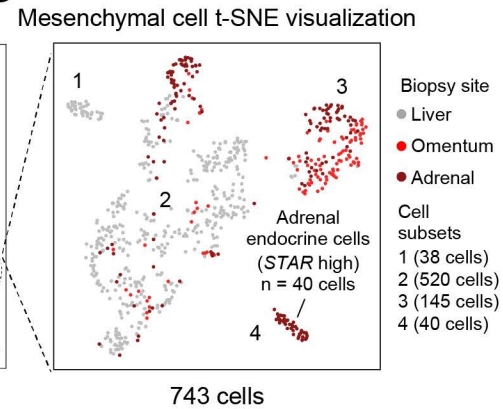

**D**

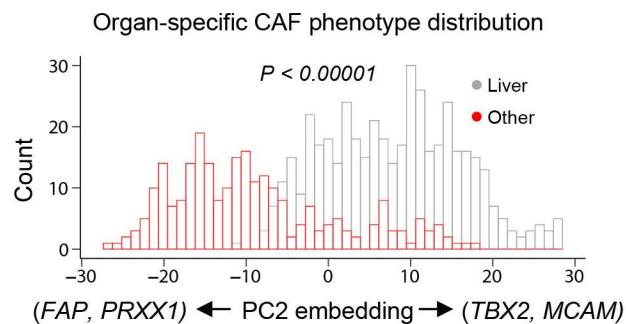

**E**

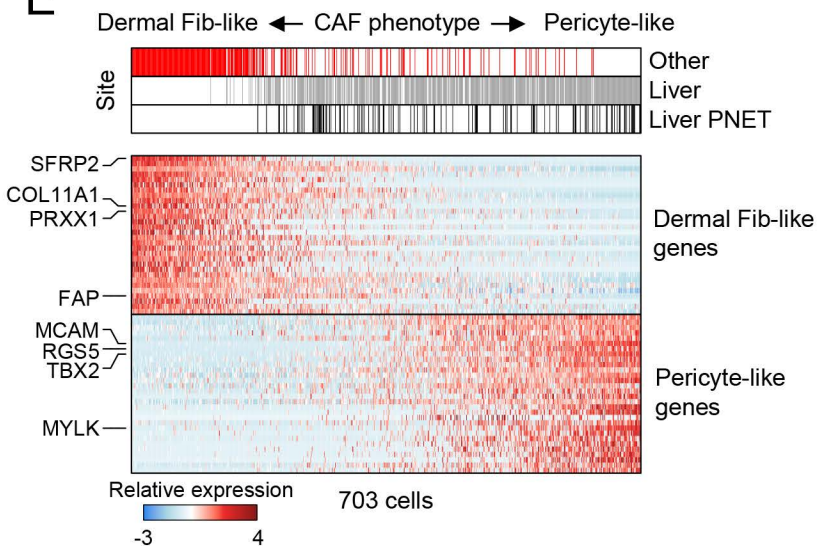

**F**

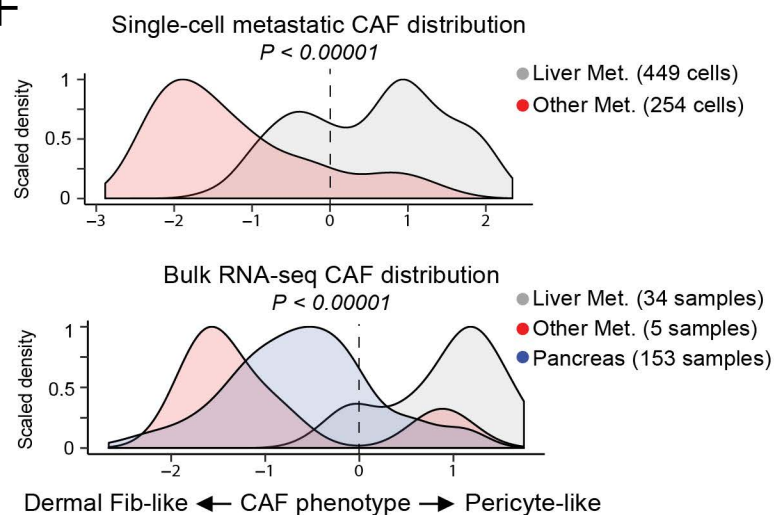



711 **Figure 5. Immune heterogeneity and distinct fibroblast phenotypes exist in the liver metastatic**  
712 **microenvironment.**

713 **(A)** *t*-SNE visualization of non-malignant cells identified in the metastatic microenvironment,  
714 abbreviations are the same as in **Figure 1D** (TAM, tumor associated macrophage; NK, natural killer).

715 **(B)** Same visualization as in **A**, but cells are colored by sampling site (Liver, grey; Other, red). Only the  
716 mesenchymal cells (dotted circle, Mes.) have appreciable separation by anatomical site.

717 **(C)** *t*-SNE visualization of sub-clustering (SNN) performed on mesenchymal cells colored by their  
718 anatomical site. Cell subsets (1-4) determined by SNN clustering.

719 **(D)** Frequency of CAFs (y axis, cell count) across PC2 scores, colored by site of biopsy tissue. *P*-value  
720 determined by student's T test.

721 **(E)** Heatmap for relative expression of the Dermal Fibroblast-like (PC2 low) and Pericyte-like (PC2 high)  
722 programs. Anatomical site is shown for each cell (top).

723 **(F)** Density plots for CAF phenotype score in single cells from our metastatic cohort (top) or previously  
724 published PDAC bulk RNA-seq profiles (bottom) (Aguirre et al., 2018; Cancer Genome Atlas Research  
725 Network, 2017), fill indicates anatomical site. *P*-value determined by student's T test (top) or by ANOVA  
726 followed by Tukey's HSD (bottom).

727

728 *See also Supplemental Figure S6; Supplemental Table S2.*

# Figure 6

**A**

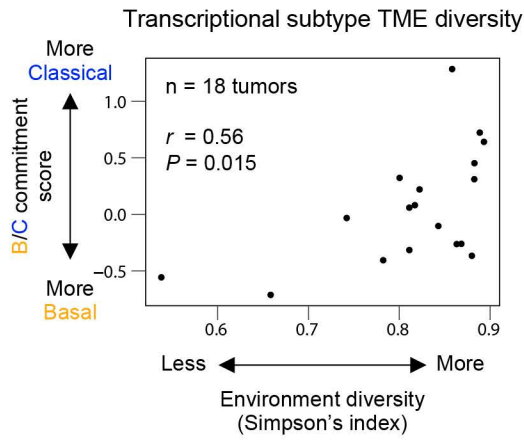

**D**

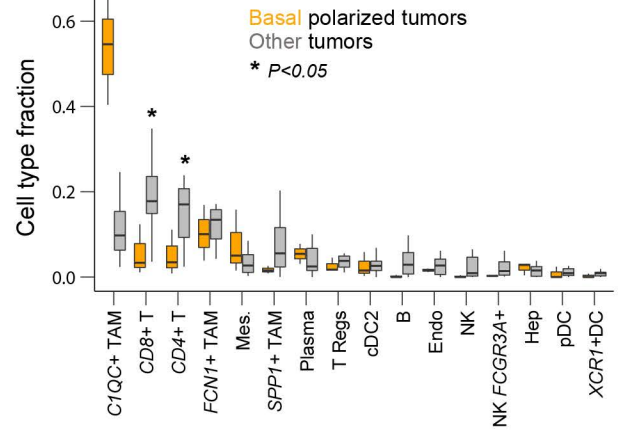

**B**

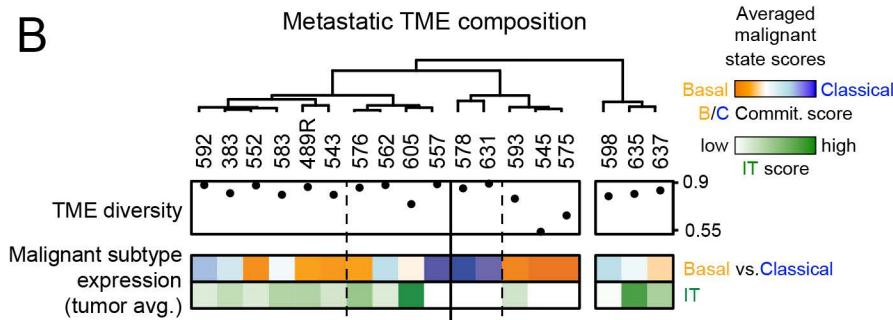

**C**

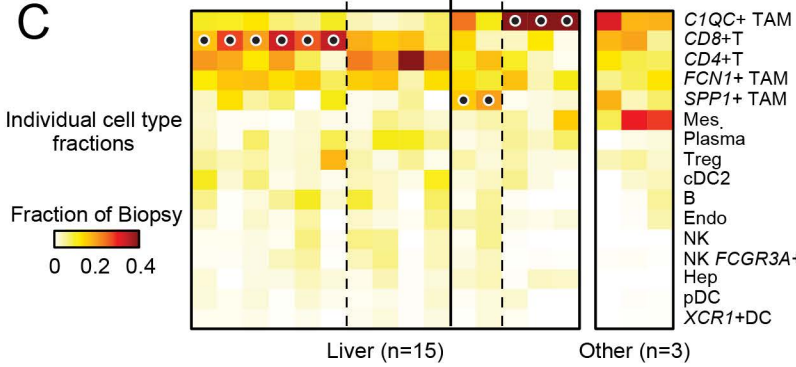

**E**

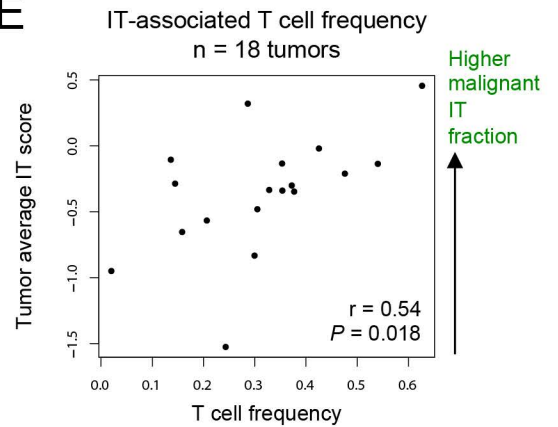

**F**

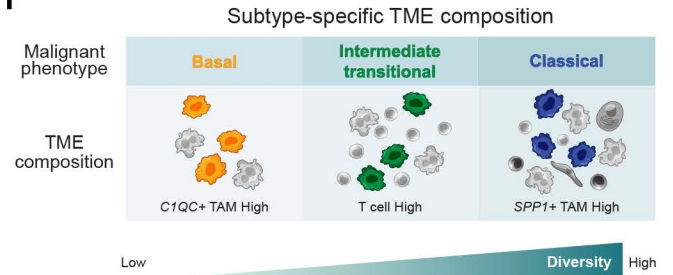

729 **Figure 6. Transcriptional subtypes associate with distinct metastatic microenvironments.**  
730 **(A)** Correlation between microenvironment diversity (Simpson's Index, x axis) and the average malignant  
731 basal-classical commitment score for each biopsy (y axis).  
732 **(B)** Dot plot indicates the Simpson's Index calculated for each biopsy and heat bars indicate each tumor's  
733 average malignant cell expression for each of the malignant transcriptional programs.  
734 **(C)** Fraction of each non-malignant cell type (heat, rows) in each biopsy sample (columns). Dots indicate  
735 top statistically significant cell type frequency differences calculated using Kruskal-Wallis test with  
736 multiple hypothesis correction. Samples are ordered as in **B**.  
737 **(D)** Box plots compare cell type fraction between the basal polarized tumors with low diversity  
738 (PANFR0593, 575, 545) and all others. *P*-value determined by student's T test.  
739 **(E)** Correlation between T cell fraction and IT malignant score.  
740 **(F)** Schematic summarizing associations between microenvironmental diversity, non-malignant  
741 infiltrates, and tumor subtype.  
742  
743 *See also Supplemental Figure S6; Supplemental Table S2.*

# Figure 7

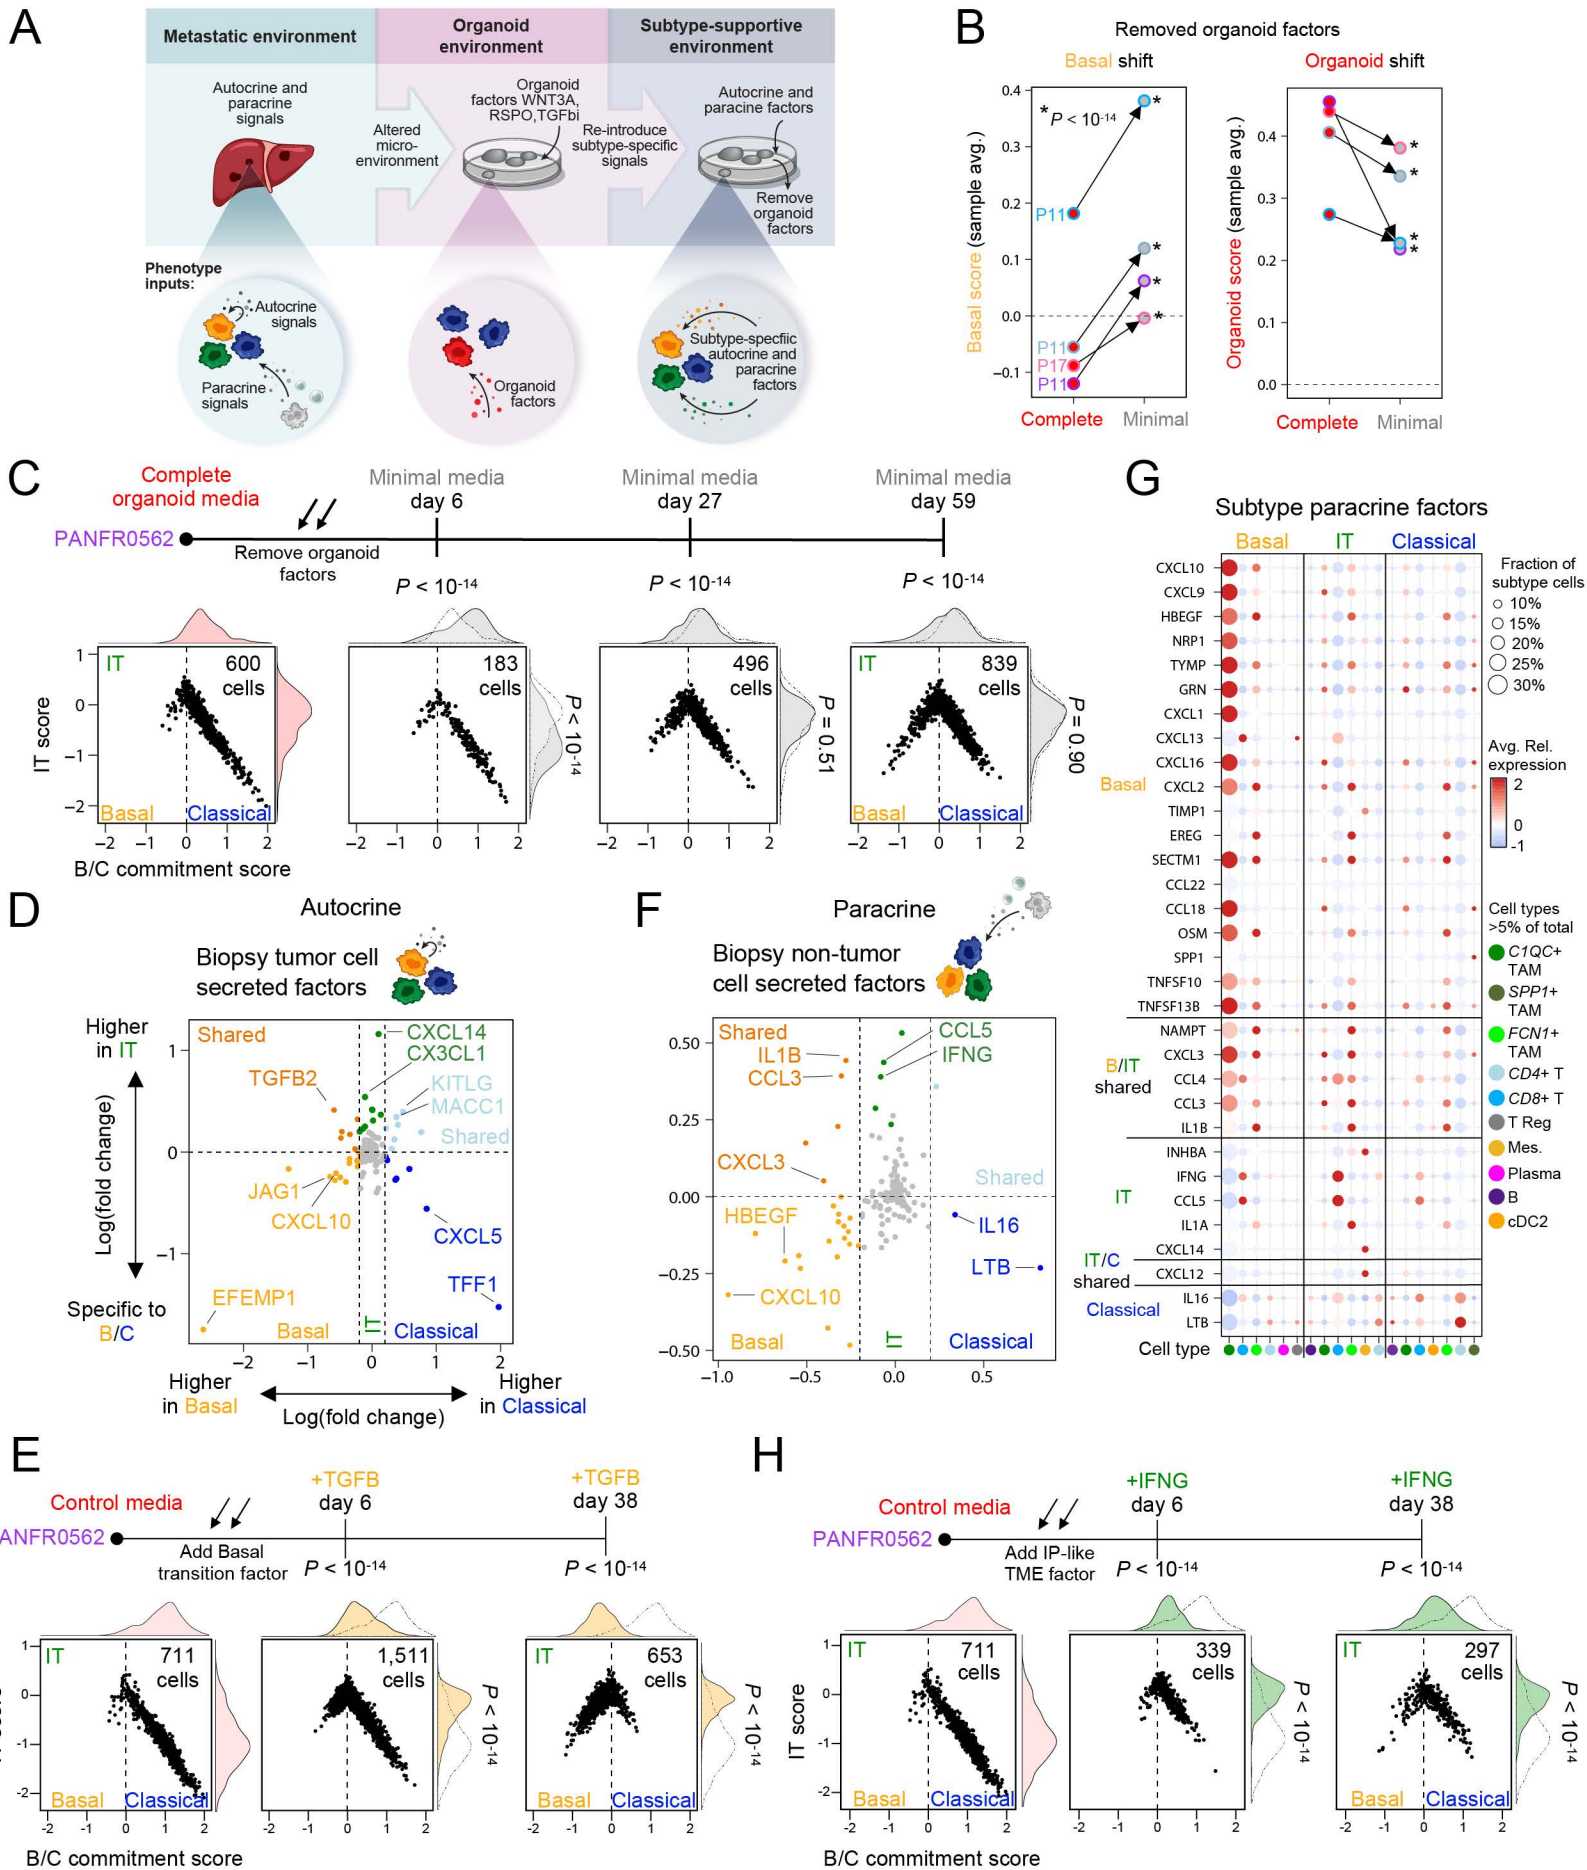

744 **Figure 7. Tumor subtype-specific secreted microenvironmental factors rescue malignant**  
745 **transcriptional heterogeneity.**

746 **(A)** Schematic describing microenvironmental inputs *in vivo* (“Metastatic environment”) versus *ex vivo*  
747 (“Organoid environment”) to tumor phenotype. Right panel (“Subtype-supportive environment”) describes  
748 an overall strategy to recover malignant transcriptional heterogeneity by removing organoid factors **(B,**  
749 **C)** and adding state-specific autocrine **(D, E)** or paracrine **(F-H)** factors.

750 **(B)** Tied dot plot represents the sample average basal score (left) and organoid-specific score (right) in  
751 the indicated conditions. Lines tie samples and color outlines indicate sample identity as in **Figure 1B**.  
752 *P*-value compares respective single cell distributions within models and was calculated by student’s *T*  
753 test.

754 **(C)** Cell state diagrams for organoid cells cultured in complete medium or at 3 time points in minimal  
755 media. *P*-values for group differences between B/C commitment (top) and IT scores (right) were  
756 calculated by ANOVA followed by Tukey’s HSD. *P*-values displayed are for that timepoint vs. the  
757 complete media condition.

758 **(D)** Differential expression (Wilcoxon rank sum test) for known secreted factors by *in vivo* tumor cells  
759 (autocrine) between basal and classical (x axis) and IT malignant cells and the rest (y axis). Subtype-  
760 specific genes that pass significance after multiple hypothesis correction ( $P < 0.05$ ) are colored by their  
761 group association.

762 **(E)** Cell state diagrams with marginal density plots for organoid cells cultured in control medium (OWRNA,  
763 reduced organoid medium) or at 2 time points in control media with TGF- $\beta$ . *P*-values for group differences  
764 between B/C commitment (top) and IT scores (right) were calculated by ANOVA followed by Tukey’s  
765 HSD. *P*-values displayed are for that timepoint vs. the control media condition.

766 **(F)** Differential expression (Wilcoxon rank sum test) for known secreted factors by all non-malignant cells  
767 (paracrine) found in basal and classical (x axis) and IT biopsies and the rest (y axis). Subtype-specific  
768 genes expressed by non-malignant cells that pass significance after multiple hypothesis correction ( $P <$   
769  $0.05$ ) are colored by their group association.

770 **(G)** Dot plot for the subtype-specific significant differentially expressed paracrine factors. Subtype-specific  
771 non-malignant cell types (columns) and significant genes (rows) are binned by subtype association as in  
772 **Figure 6C** and **Figure 7F**. Dot size represents that cell type’s fraction within tumors of each subtype, and  
773 fill color indicates average expression. Only cell types with a fractional representation  $>5\%$  from each  
774 subtype are visualized.

775 **(H)** Cell state diagrams with marginal density plots for organoid cells cultured in control medium (OWRNA,  
776 reduced organoid medium, as in **E**) or at 2 time points in control media with IFN $\gamma$ . *P*-values for group

777 differences between B/C commitment (top) and IT scores (right) were calculated by ANOVA followed by  
778 Tukey's HSD. *P*-values displayed are for that timepoint vs. the control media condition.

779

780 *See also Supplemental Figure S7; Supplemental Table S6 & S7.*



781 **METHODS**

782

783 **RESOURCE AVAILABILITY**

784

785 **Lead Contact**

786 Further information and requests for resources and reagents should be sent to and will be fulfilled by  
787 Dr. Alex Shalek ([shalek@mit.edu](mailto:shalek@mit.edu)).

788

789 **Data Availability**

790 The single-cell RNA sequencing data reported in this paper will be deposited in a central data sharing  
791 repository (Genomic Data Commons) under the NCBI Database of Genotypes and Phenotypes (dbGaP).  
792 Code will be available upon request.

793

794 **Tissue collection and dissociation.** Investigators obtained written, informed consent from patients with  
795 pancreatic cancer for Dana-Farber/Harvard Cancer Center Institutional Review Board (IRB)-approved  
796 protocols 11-104, 17-000, 03-189, and/or 14-408 for tissue collection, molecular analysis, and organoid  
797 generation. Core needle biopsy specimens were collected and the first core was sent for pathologic  
798 analysis. One or more additional cores were then allocated for scRNA-seq and organoid generation.

799 Samples were minced into small portions using a scalpel and then digested at 37°C for 15 minutes  
800 using digest medium that consisted of human complete organoid medium (see below), 1 mg/mL  
801 collagenase XI (Sigma Aldrich), 10 µg/mL DNase (Stem Cell Technologies), and 10 µM Y27632 (Selleck)  
802 (Tiriac et al., 2018). In our initial process optimization, we found that dissociation times below 30 minutes,  
803 while not always completely digesting all biopsy material and potentially affecting the representation of  
804 difficult to dissociate cell types (e.g., fibroblasts), resulted in greater cell viability and improved RNA  
805 quality downstream. After digestion, cells were washed, treated with ACK lysing buffer (Gibco) to lyse  
806 red blood cells, washed again, and counted using a hemocytometer with 0.4% Trypan blue (Gibco) added  
807 at 1:1 dilution for viability assessment. We allowed residual tissue chunks to settle before selecting a  
808 predominance of single cells for counting and Seq-Well processing. We allocated between 10,000 and  
809 15,000 viable cells per Seq-Well array based upon total cell counts, and where possible we prepared two  
810 arrays per sample. Most samples were processed and loaded onto Seq-Well arrays within 2-3 hours of  
811 biopsy acquisition.

812

813 **Organoid generation and sampling.** Cells remaining after scRNA-seq allocation were initiated and  
814 maintained as patient-derived organoid cultures as previously described (Boj et al., 2015; Tiriach et al.,  
815 2018). In brief, digested cells were seeded in 3-dimensional (3D) Growth-factor Reduced Matrigel  
816 (Corning) and fed with human complete organoid medium containing advanced DMEM/F12 (Gibco), 10  
817 mM HEPES (Gibco), 1x GlutaMAX (Gibco), 500 nM A83-01 (Tocris), 50 ng/mL mEGF (Peprotech), 100  
818 ng/mL mNoggin (Peprotech), 100 ng/mL hFGF10 (Peprotech), 10 nM hGastrin I (Sigma), 1.25 mM N-  
819 acetylcysteine (Sigma), 10 mM Nicotinamide (Sigma), 1x B27 supplement (Gibco), R-spondin1  
820 conditioned media 10% final, Wnt3A conditioned media 50% final, 100 U/mL penicillin/streptomycin  
821 (Gibco), and 1x Primocin (Invivogen) (**Supplemental Table S6**). 10  $\mu$ M Y27632 (Selleck) was included  
822 in the culture medium of newly initiated samples until the first media exchange. For propagation,  
823 organoids were dissociated with TrypLE (Gibco) before re-seeding into fresh Matrigel and culture  
824 medium.

825 After initial processing of fresh tissue specimens, we monitored samples closely for organoid  
826 growth. We did not passage organoids at set time intervals, as there was significant variability in the time  
827 needed to establish relatively robust growth of organoids (**Figure 4C**). Instead, we maintained early  
828 passage organoids until they reached relative confluence, and then passaged them at low split ratios  
829 (1:1, 1:1.5, or 1:2 dilutions) in complete organoid medium to promote continued growth. In one case,  
830 PANFR0489R, cells persisted as individuals and small organoids after initiation in complete organoid  
831 medium, but did not grow and expand cell numbers significantly. Approximately 15 weeks after initiation,  
832 we switched a portion of the surviving cells to organoid medium without A83-01 or mNoggin, and  
833 observed renewed growth of organoids under these media conditions but not of those that remained in  
834 complete organoid medium. Consequently, we expanded this sample in media without A83-01 or  
835 mNoggin, including performing early passage scRNA-seq. After several additional passages, once the  
836 organoids were robustly growing, we were able to transition back to complete organoid medium with no  
837 apparent change in growth rate, morphology, or transcriptional phenotype. All other serially sampled  
838 organoids were maintained and assessed by scRNA-seq in complete medium.

839 For scRNA-seq of organoid samples, we passaged organoids and allowed them to grow for 6  
840 days before then dissociating, counting, and allocating 15,000 viable cells for Seq-Well. By standardizing  
841 the collection of organoid scRNA-seq samples at 6 days after passaging, we tried to minimize bias arising  
842 from cell cycle differences in samples at different degrees of confluence.

843

844 **Testing organoid phenotypes under different matrix and media conditions.** For adaptation of  
845 patient-derived organoids onto 2-dimensional (2D) culture surfaces as patient-derived cell lines, tissue  
846 culture plates were pre-coated with 100  $\mu$ g/mL Matrigel dissolved in basal media for 2 hours at 37°C

847 before washing with PBS. Established organoid models were dissociated and seeded onto these  
848 Matrigel-coated culture wells in complete organoid media. In parallel, a portion of these passage-matched  
849 organoid cells were re-seeded into Matrigel droplets as above. Cells were cultured in both matrix  
850 conditions in complete organoid media until they were confluent, approximately 2-3 weeks. Cells were  
851 collected and lysed using Trizol before snap freezing. RNA was isolated and purified as described below  
852 (“Bulk RNA-sequencing of organoids” section) using chloroform extraction, aqueous phase isolation, and  
853 processing using the Qiagen AllPrep DNA/RNA/miRNA Universal kit before being submitted for  
854 sequencing.

855 For scRNA-seq assessment of organoid phenotypes when cultured under different media  
856 conditions, established organoid models were passaged as above by dissociating and reseeding into  
857 Matrigel droplets. A portion of the cells were cultured with complete organoid media (“Complete media”),  
858 while a distinct portion of passage-matched cells were cultured in “Minimal” media, which consisted of  
859 advanced DMEM/F12 (Gibco), 10 mM HEPES (Gibco), 1x GlutaMAX (Gibco), 100 U/mL  
860 penicillin/streptomycin (Gibco), and 1x Primocin (Invivogen) (**Supplemental Table S6**). Cells were  
861 cultured for 6 days before being collected, dissociated, and aliquoted for scRNA-seq. Images were taken  
862 with an Olympus XM10 camera mounted to an Olympus CKX41 microscope 1 day after seeding and  
863 again after 11 days in culture to assess organoid growth in both conditions. The portion of cells cultured  
864 in minimal media were maintained in the same conditions for a longer duration and harvested again for  
865 scRNA-seq at 27 days and 59 days after the initial introduction of minimal media. To mirror the standard  
866 scRNA-seq workflow, the cells harvested at the 27- and 59-day timepoints were collected 6 days after  
867 passaging.

868 In addition to the minimal media experiment, organoid cells were also cultured in standard cell  
869 line media (“RP10”), which contains RPMI-1640 (Gibco) and 100 U/mL penicillin/streptomycin (Gibco)  
870 with 10% fetal bovine serum (Sigma), or in reduced organoid media “OWRNA”, which consists of  
871 advanced DMEM/F12 (Gibco), 10 mM HEPES (Gibco), 1x GlutaMAX (Gibco), 50 ng/mL mEGF  
872 (Peprotech), 100 ng/mL hFGF10 (Peprotech), 10 nM hGastrin I (Sigma), 1.25 mM N-acetylcysteine  
873 (Sigma), 10 mM Nicotinamide (Sigma), 1x B27 supplement (Gibco), 100 U/mL penicillin/streptomycin  
874 (Gibco), and 1x Primocin (Invivogen) (i.e. complete organoid medium with removal of WNT3A,  
875 RSPONDIN-1, NOGGIN, and A-8301; **Supplemental Table S6**). Furthermore, OWRNA reduced  
876 organoid medium served as the baseline control medium when assessing the effect of specific factors  
877 (IFNG $\gamma$  and TGF- $\beta$ 1) from the TME on transcriptional phenotypes. Cells were cultured for 6 days before  
878 being collected, dissociated, and aliquoted for scRNA-seq in each of the following conditions: RP10,  
879 OWRNA, OWRNA with 50 ng/mL IFNG $\gamma$  (Peprotech), and OWRNA with 5 ng/mL TGFB1 (Peprotech)  
880 (**Supplemental Table S6**). The cells cultured under the IFNG $\gamma$  and TGF- $\beta$ 1 conditions were maintained

881 in culture and harvested again for scRNA-seq 38 days after being introduced to these new media  
882 conditions. For these longer duration timepoints, cells were again passaged 6 days before collecting for  
883 scRNA-seq.

884

885 **Testing transcriptional phenotype changes in an established cell line under organoid media**  
886 **conditions.** For scRNA-seq assessment of transcriptional phenotypes of the established pancreatic  
887 cancer cell line CFPAC1 under different media conditions, CFPAC1 cells were cultured in parallel in  
888 either standard cell line medium RP10 or complete organoid medium. Cells were cultured for 6 days  
889 before being collected, dissociated, and aliquoted for scRNA-seq. Additionally, the CFPAC1 cells cultured  
890 under complete organoid medium were maintained in the same conditions and harvested again for  
891 scRNA-seq 33 days after the initial introduction of complete organoid medium. CFPAC1 cells grown in  
892 complete media for the later 33-day timepoint were collected 6 days after passaging, and media was  
893 refreshed 3 days after this final passage.

894

895 **Single-cell RNA-seq (scRNA-seq) data library generation, sequencing, and alignment.** ScRNA-seq  
896 processing followed the Seq-Well protocol, uniquely compatible with low-input samples (Gierahn et al.,  
897 2017; Hughes et al., 2020). Briefly, arrays were preloaded with RNA capture beads (ChemGenes) and  
898 stored in quenching buffer until used. Prior to cell loading, arrays were resuspended in 5 mL RPMI-1640  
899 medium with 10% fetal bovine serum (both from Gibco, hereafter referred to as RP10). After dissociation,  
900 single-cell suspensions were manually counted and diluted to 15,000 cells per 200  $\mu$ L of RP10 when cell  
901 numbers allowed. Excess RP10 was aspirated from the array and cells were loaded onto arrays. Excess  
902 cells were washed off with PBS (4x5 mL, Gibco), briefly left in RPMI (5 mL) and cell+bead pairs were  
903 sealed for 40 minutes at 37°C using a polycarbonate membrane (Fisher Scientific NC1421644). Arrays  
904 were rocked in lysis buffer for 20 minutes and RNA was hybridized onto the beads for 40 minutes. Beads  
905 were removed and reverse transcription was performed overnight using Maxima H Minus Reverse  
906 Transcriptase (Thermo Fisher EP0753). Prior to sequencing, the beads underwent an exonuclease  
907 treatment (NewEngland Biolabs M0293L) and second strand synthesis *en masse* followed by whole  
908 transcriptome amplification (WTA, Kapa Biosystems KK2602) in 1,500 bead reactions (50  $\mu$ L). cDNA was  
909 isolated using Agencourt AMPure XP beads (Beckman Coulter, A63881) at 0.6X SPRI (solid-phase  
910 reversible immobilization) followed by a 1X SPRI and quantified using a Qubit dsDNA High Sensitivity  
911 assay kit (Thermo Fisher Q32854). Library preparation was performed using Nextera XT DNA  
912 tagmentation (Illumina FC-131-1096) and N700 and N500 indices specific to a given sample. Tagmented  
913 and amplified sequences were purified with a 0.6X SPRI. cDNA was loaded onto either an Illumina  
914 Nextseq (75 Cycle NextSeq500/550v2 kit) or Novaseq (100 Cycle NovaSeq6000S kit, Broad Institute

915 Genomics Platform) at 2.4 pM. Regardless of platform, the paired end read structure was 21 bases (cell  
916 barcode and UMI) by 50 bases (transcriptomic information) with an 8 base pair (bp) custom read one  
917 primer. The demultiplex and alignment protocol was followed as previously described (Macosko et al.,  
918 2015). While Novaseq data were directly output as FASTQs, Nextseq BCL files were converted to  
919 FASTQs using bcl2fastq2. The resultant Nextseq and Novaseq FASTQs were demultiplexed by sample  
920 based on Nextera N700 and N500 indices. Reads were then aligned to the hg19 transcriptome using the  
921 cumulus/dropseq\_tools pipeline on Terra maintained by the Broad Institute using standard settings.

922

923 **Bulk RNA-sequencing of organoids.** RNA was obtained for bulk RNA-sequencing from established  
924 organoids using one of two approaches. Dissociated organoids were resuspended into cold Matrigel,  
925 added as droplets to tissue culture plates (Greiner BioOne), and allowed to polymerize for 30 minutes  
926 before addition of media. Organoids were grown for 14-21 days (until confluent) under these conditions  
927 with regular media changes. At the time of harvest, cells were washed with cold phosphate buffered  
928 saline (PBS) at 4°C, then lysed with Trizol (Invitrogen) before snap-freezing. To isolate RNA, we  
929 performed chloroform extraction with isolation of the aqueous phase before processing RNA as per  
930 protocols outlined in the Qiagen AllPrep DNA/RNA/miRNA Universal kit.

931 In the second approach, dissociated organoids were resuspended in a solution of 10% Matrigel  
932 in complete organoid media (volume/volume) and cultured in ultra-low-attachment culture flasks  
933 (Corning). Organoids were grown for 14-21 days (until confluent) before pelleting, washing with cold PBS  
934 at 4°C until most Matrigel was dissipated, and then snap frozen. For RNA isolation, cell pellets were  
935 homogenized using buffer RLT Plus (Qiagen) and a Precellys homogenizer. Samples were then  
936 processed for both DNA extraction and RNA isolation as per the Qiagen AllPrep DNA/RNA/miRNA  
937 Universal kit. Purified RNA was then submitted for sequencing by the Broad Institute Genomics Platform.

938 In brief, total RNA was quantified using the Quant-iT RiboGreen RNA Assay Kit (Thermo Fisher  
939 R11490) and normalized to 5 ng/μL. Following plating, 2 μL of a 1:1000 dilution of ERCC RNA controls  
940 (Thermo Fisher 4456740) were spiked into each sample. An aliquot of 200 ng for each sample was  
941 transferred into library preparation which uses an automated variant of the Illumina TruSeq Stranded  
942 mRNA Sample Preparation Kit. This method preserves strand orientation of the RNA transcript, and  
943 uses oligo dT beads to select mRNA from the total RNA sample followed by heat fragmentation and  
944 cDNA synthesis from the RNA template. The resultant 400 bp cDNA then goes through dual-indexed  
945 library preparation: 'A' base addition, adapter ligation using P7 adapters, and PCR enrichment using P5  
946 adapters. After enrichment, the libraries were quantified using Quant-iT PicoGreen (1:200 dilution;  
947 Thermo Fisher P11496). After normalizing samples to 5 ng/μL, the set was pooled and quantified using

948 the KAPA Library Quantification Kit for Illumina Sequencing Platforms. The entire process was performed  
949 in 96-well format and all pipetting was done by either Agilent Bravo or Hamilton Starlet.

950 Pooled libraries were normalized to 2 nM and denatured using 0.1 N NaOH prior to sequencing.  
951 Flowcell cluster amplification and sequencing were performed according to the manufacturer's protocols  
952 using the NovaSeq 6000. Each run was a 101 bp paired-end with an eight-base index barcode read.  
953 Data were analyzed using the Broad Picard Pipeline which includes de-multiplexing and data aggregation  
954 (<https://broadinstitute.github.io/picard/>). FASTQ files were then processed as described below (see Bulk  
955 RNA-sequencing analysis).

956

957 **Multiplex immunofluorescence imaging.** A multi-marker panel was developed to characterize tumor  
958 cell subtype in formalin-fixed paraffin-embedded (FFPE) 4 $\mu$ m tissue sections using multiplex  
959 immunofluorescence. The panel comprises markers associated with either a basal (Keratin-17: Thermo  
960 Fisher MA513539 and s100a2: Abcam 109494 ) or classical (cldn18.2: Abcam 241330, GATA6: CST  
961 5851 and TFF1: Abcam 92377) subtype. Additionally, DAPI (Akoya Biosciences FP1490) was included  
962 for identification of nuclei and pan-cytokeratin (AE1/AE3: DAKO M3515; C11: CST 4545) for identification  
963 of epithelial cells. Secondary Opal Polymer HRP mouse and rabbit (ARH1001EA), Tyramide signal  
964 amplification and Opal fluorophores (Akoya Biosciences) were used to detect primary antibodies (Keratin-  
965 17, Opal 520; s100a2, Opal 650; GATA6, Opal 540; cldn18.2, Opal 570; TFF1, Opal 690; panCK, Opal  
966 620). Prior to use in multiplex staining, primary antibodies were first optimized via immunohistochemistry  
967 on control tissue to confirm contextual specificity. Monoplex immunofluorescence and iterative multiplex  
968 fluorescent staining were then used to optimize staining order, antibody-fluorophore assignments and  
969 fluorophore concentrations. Multiplex staining was performed using a Leica BOND RX Research Stainer  
970 (Leica Biosystems, Buffalo, IL) with sequential cycles of antigen retrieval, protein blocking, primary  
971 antibody incubation, secondary antibody incubation, and fluorescent labeling. Overview images of  
972 stained slides were acquired at 10X magnification using a Vectra 3.0 Automated Quantitative Imaging  
973 System (Perkin Elmer, Waltham, MA) and regions of interest (ROIs) were selected for multispectral image  
974 acquisition at 20X. After unmixing using a spectral library of single-color references, each image was  
975 inspected to ensure uniform staining quality and adequate tumor representation.

976

## 977 **Data analysis**

978 **Mutation and CNV identification from bulk DNA-sequencing.** For targeted DNA-sequencing of clinical  
979 samples, next-generation sequencing using a custom-designed hybrid capture library preparation was  
980 performed on an Illumina HiSeq 2500 with 2x100 paired-end reads, as previously described (Garcia et  
981 al., 2017; Sholl et al., 2016). Sequence reads were aligned to reference sequence b37 edition from the



982 Human Genome Reference Consortium using bwa, and further processed using Picard (version 1.90,  
983 <http://broadinstitute.github.io/picard/>) to remove duplicates and Genome Analysis Toolkit (GATK, version  
984 1.6-5-g557da77) to perform localized realignment around indel sites. Single nucleotide variants were  
985 called using MuTect v1.1.45, insertions and deletions were called using GATK Indelocator. Copy number  
986 variants and structural variants were called using the internally-developed algorithms RobustCNV and  
987 BreaKmer followed by manual review (Abo et al., 2015). RobustCNV calculates copy ratios by performing  
988 a robust linear regression against a panel of normal samples. The data were segmented using circular  
989 binary segmentation, and event identification was performed based on the observed variance of the data  
990 points (Bi et al., 2017).

991 We computed the cytoband-level copy number calls and weighted (by length) average segment  
992 means across the covered regions of each cytoband using ASCETS (Spurr et al., 2020). Briefly,  
993 cytobands were considered amplified/deleted if more than 70% of the covered regions had a log<sub>2</sub> copy  
994 ratio of greater than 0.2/less than -0.2, and were considered neutral if more than 70% of the covered  
995 regions had a log<sub>2</sub> copy ratio between -0.2 and 0.2.

996

997 **Single-cell data quality pre-processing and initial cell type discovery.** All single-cell data analysis  
998 was performed using the R language for Statistical Computing (v3.5.1). Each biopsy sample's digital  
999 gene expression (DGE) matrix (cells x genes) was trimmed to exclude low quality cells (<400 genes  
1000 detected; <1,000 UMIs; >50% mitochondrial reads) before being merged together (preserving all unique  
1001 genes) to create the larger biopsy dataset. The merged dataset was further trimmed to remove cells with  
1002 >8,000 genes which represent outliers and likely doublet cells. We also removed genes that were not  
1003 detected in at least 50 cells. The same metrics were applied to the organoid single-cell cohort (see below).  
1004 On a per cell basis, UMI count data was divided by total transcripts captured and multiplied by a scaling  
1005 factor of 10,000. These normalized values were then natural log transformed for downstream analysis  
1006 (i.e. log-normalized cell x gene matrix). Initial exploration of the data was performed using the R package  
1007 Seurat (v2.3.4) and followed two steps: 1) SNN-guided quality assessment and 2) cell type composition  
1008 determination. In step 1, we intentionally left cells in the DGE matrix of dubious quality (e.g. %  
1009 mitochondrial reads >25% but <50%), performed principal component analysis (PCA) over the variable  
1010 genes (n = 1,070 genes), and input the first 50 PCs (determined by Jackstraw analysis implemented  
1011 through Seurat) to build an SNN graph and cluster the cells (res = 1; k.param = 40). The inclusion of  
1012 poor-quality cells essentially acts as a variance "sink" for other poor-quality cells and they cluster together  
1013 based on their shared patterns in quality-associated gene expression. This method helped to nominate  
1014 additional low quality (e.g. defined exclusively by mitochondrial genes) or likely doublet cells (e.g. clusters  
1015 defined by co-expression of divergent lineage markers) which were removed from the dataset (n=1,678

1016 cells). This led to an overall high-quality dataset of single-cells with a low overall fraction of mitochondrial  
1017 reads (median = 0.09) for downstream analysis (**Supplemental Figure S1B**)

1018 Using the trimmed dataset, we proceeded to step 2 using a very similar workflow as above but  
1019 with slightly altered input conditions for defining clusters. Here we used PCs 1-45 and their associated  
1020 statistically significant genes for building the SNN graph and determining cluster membership (resolution  
1021 = 1.2; k.param = 40). This identified the 36 clusters shown (visualized using *t*-SNE; perplexity, 40;  
1022 iterations, 2,500) in **Supplemental Figure S1C**. The expression of known markers was used to collapse  
1023 clusters containing shared lineage information. For example, clusters 1, 2, and 4 all express high levels  
1024 of macrophage markers—*CD14*, *FCGR3A (CD16)*, *CD68*—and were accordingly collapsed for this first  
1025 pass analysis (**Supplemental Figure S1C,G**). To aid our cell type identification, we performed a ROC  
1026 test implemented in Seurat to confirm the specificity (power > 0.6) of the top marker genes used to discern  
1027 the cell types. Combined with inferred CNV information (see below), this analysis confirmed the presence  
1028 of 11 broad non-malignant cell types in our biopsy dataset (**Supplemental Table S2**). Variation in the  
1029 SNN graph parameters above did not strongly affect cell type identification.

1030

1031 **Single-cell CNV identification.** To confirm the identity of the putative malignant clusters identified in  
1032 **Supplemental Figure S1D**, we estimated single-cell CNVs as previously described by computing the  
1033 average expression in a sliding window of 100 genes within each chromosome after sorting the detected  
1034 genes by their chromosomal coordinates (Patel et al., 2014; Tirosh et al., 2016b). We used all T/NK, Fib,  
1035 Hep, and Endo cells identified above as reference normal populations for this analysis. Complete  
1036 information on the inferCNV workflow used for this analysis can be found here  
1037 <https://github.com/broadinstitute/inferCNV/wiki>. To compare with bulk targeted DNA-sequencing, we  
1038 collapsed individual probes to cytoband-level information (weighted average of log<sub>2</sub> ratios across each  
1039 cytoband, see above) within each sample. ScRNA-seq-inferred CNVs showed high concordance across  
1040 samples with the bulk measurements and suggests that, at least by this metric, we are likely sampling  
1041 the same dominant clones within sequential but distinct cores from each needle biopsy procedure  
1042 (**Supplemental Figure S1E**). For plotting CNV profiles in putative malignant versus normal cells  
1043 (**Supplemental Figure S1F**), we computed the average CNV signal for the top 5% of altered cells in  
1044 each biopsy and correlated all cells in that biopsy to the averaged profile as has been previously  
1045 described (Tirosh et al., 2016a). Relation of this correlation coefficient to the CNV score (mean square  
1046 deviation from diploidy) in the single cells from each biopsy shows consistent separation of malignant  
1047 from non-malignant cells, and, combined with membership in patient-specific SNN clusters, substantiates  
1048 the identification of malignant cells in our dataset.

1049

1050 **Subclonal analysis with single-cell inferred CNVs.** The inferCNV workflow can be used to call  
1051 subclonal genetic variation with high sensitivity and is comprehensively outlined here  
1052 <https://github.com/broadinstitute/inferCNV/wiki> (Fan et al., 2018; Patel et al., 2014; Tirosh et al., 2016b).  
1053 Briefly, we used a six-state Hidden Markov Model (i6-HMM) to predict relative copy number status  
1054 (complete loss to >3x gain) across putative altered regions in each cell. A Bayesian latent mixture model  
1055 then evaluated the posterior probability that a given copy number alteration is a true positive. We set a  
1056 relatively stringent cutoff for this step (BayesMaxPNormal = 0.2) to only include high probability  
1057 alterations for downstream clustering. The results of this filtered i6-HMM output were then used to cluster  
1058 the single cells using Ward's method. We used inferCNV's "random trees" method to test for statistical  
1059 significance ( $P < 0.05$ , 100 random permutations for each split) at each tree bifurcation and only retained  
1060 subclusters that had statistical evidence underlying the presumed heterogeneity. To track subclonal  
1061 heterogeneity between biopsy and matched organoid cells in **Figure 3G** and **Supplemental Figure S5E-**  
1062 **I**, the above workflow was implemented within each biopsy and the relevant matched organoid samples,  
1063 essentially treating all cells as the same "tumor" and allowing the CNVs to determine cell sorting agnostic  
1064 to sample-of-origin. The results of the HMM output can be used to infer gene-level information based on  
1065 which genes are in the affected window. This (like the rest of the HMM workflow) is computed over groups  
1066 of cells (e.g. samples or sub-clones) and used to map *KRAS* and other alterations to samples (**Figure**  
1067 **3A-F**) or sub-clones (**Figure 3G, Supplemental Figure S5E-I**).

1068  
1069 **Subclustering of malignant and non-malignant cells.** Detailed phenotyping required splitting the  
1070 dataset into malignant and non-malignant fractions. After subsetting to only the malignant cells, we re-  
1071 scaled the data and ran PCA including the first 35 PCs for SNN clustering and *t*-SNE visualization. This  
1072 PCA was used to determine the PanNET identity for PANFR0580 (**Supplemental Figure S2A**). After  
1073 removing PANFR0580, we repeated the steps above and used this new PCA for the remainder of PDAC  
1074 malignant cell analysis. Subsequent phenotyping for malignant cells is discussed below (**Generation of**  
1075 **expression signatures/scores**). A similar approach was used for calling the non-malignant subsets in  
1076 **Figure 5A**. To determine the specific phenotypes within T/NK, macrophage, and mesenchymal  
1077 populations, we separately subclustered these groups using PCs 1-20 and a resolution of 0.6 in each  
1078 case. Of note, subclustering within the macrophages revealed a distinct cluster of cells co-expressing  
1079 markers of both T/NK cells and macrophages (n=491 cells). We discarded these cells as likely doublets,  
1080 as have others, and re-ran the macrophage PCA and clustering (Zhang et al., 2020; Zilionis et al., 2019).  
1081 These cells are included in the full dataset in case they are of interest to others. Each unbiased analysis  
1082 helped to define the non-malignant phenotypes summarized in **Figures 5 & 6** and **Supplemental Figure**  
1083 **S6**.

1084

1085 **Generation of expression signatures/scores.** All expression scores were computed as previously  
1086 described by taking a given input set of genes and comparing their average relative expression to that of  
1087 a control set (n=100 genes) randomly sampled to mirror the expression distribution of the genes used for  
1088 the input (Tirosh et al., 2016b). While all scores were computed in the same way, choosing the genes for  
1089 input varied. We have outlined the relevant approaches below. Where correlations (Pearson's  $r$ ) are  
1090 performed over genes, we used the log-transformed UMI count data for each case. Unless otherwise  
1091 noted, we selected the top 30 statistically significant genes for each signature (>3 s.d. above the mean  
1092 for shuffled data) for visualization and scoring.

1093 **Cell cycle.** We utilized previously established signatures for G1/S (n=43 genes) and G2/M (n=55  
1094 genes) to place each cell along this dynamic process (Tirosh et al., 2016a). After inspecting the  
1095 distribution of scores in the complete dataset, we considered any cell >1.5 s.d. above the mean for either  
1096 the G1/S or the G2/M scores to be cycling (van Galen et al., 2019).

1097 **Basal and classical programs.** We started by scoring each malignant single cell for the basal-  
1098 like and classical genes identified by Moffitt et al., 2015 as these were well described by unbiased  
1099 analysis in our data (PCA, **Supplemental Figure S2B**). To determine programs associated with basal  
1100 and classical phenotypes, we correlated the aforementioned basal and classical scores to the entire gene  
1101 expression matrix containing malignant cells and selected the 1,909 genes significantly associated with  
1102 either subtype ( $r > 0.1$ ; >3 s.d. above the mean for shuffled data, full data in **Supplemental Table S3**).  
1103 Biological pathway correlates for basal and classical mirrored previous work, and are summarized in  
1104 **Supplemental Figure S3D,E**. For visualization, we use the "scCorr" basal and classical genes (top 30  
1105 correlated genes for each). We used these basal and classical scores to order the cells by their  
1106 polarization or "score difference", simply the difference of the two scores, and revealed a significant  
1107 fraction of cells co-expressing intermediate levels of both phenotypes (**Supplemental Figure S3A,B**).

1108 **Intermediate transitional program.** Intermediate cells showed associations with features across  
1109 several additional PCs, but lacked a single dominant axis. To define a consensus set of genes that are  
1110 preferentially expressed by cells in this intermediate state, we computed the Euclidean distance to the  
1111 line representing equal basal and classical co-expression for each cell. To limit the influence of cell quality  
1112 on this analysis and to specifically identify genes related to co-expression, we used cells from each group  
1113 (basal, intermediate, and classical) with fractionally low mitochondrial genes (<0.2) and non-zero basal  
1114 or classical expression (basal or classical score > 0) and correlated their Euclidean distance  
1115 (**Supplemental Figure S3C**) to the entire gene expression matrix of malignant cells. Next, for each gene  
1116 positively associated with this intermediate state (Pearson's  $r > 0$ ), we subtracted the second highest  
1117 correlation coefficient for each subtype-associated gene (basal and classical), and then re-ranked the

1118 matrix by this corrected value. This enriched for genes more specific to the intermediate state by  
1119 excluding those that were also associated with basal or classical programs. We then selected the 115  
1120 genes with a corrected correlation value  $>0.1$  ( $P < 0.00001$ , shuffled data) as our intermediate transitional  
1121 (IT) signature (**Supplemental Figure S3D, Supplemental Table S3**). Single cells were classified based  
1122 on Euclidian distance where  $<0.2$  are defined as intermediate transitional and the remainder (Euclidian  
1123 distance  $>0.2$ ) by their maximal of either basal or classical scores. We binned each organoid cell (e.g.  
1124 **Figure 4B,C**) by its maximal expression for one of the 3 *in vivo* scores (basal, classical, or IT). Here a  
1125 cell must be within 1 s.d. of the mean expression for a given subtype *in vivo*, else it was considered  
1126 “organoid-specific” as this program was superimposed on all organoid cells, regardless of their subtype  
1127 identity (**Figure 4B**). We used these classifications to summarize overall tumor composition and visualize  
1128 the groups. Tumor heterogeneity measures were not significantly affected by changing these cutoffs.

1129 **Non-Malignant programs.** TAM signatures were determined similar to above and previous work  
1130 (van Galen et al., 2019; Zhang et al., 2020; Zilionis et al., 2019). Using PCA as an anchor (**Supplemental**  
1131 **Figure S6C**), we correlated expression within the TAM compartment to either *FCN1*, *SPP1*, or *C1QC*  
1132 (top loaded genes on each relevant PC) and merged the resultant correlation coefficients for every  
1133 detected gene to the 3 subtypes into one matrix (i.e. a 16,920 x 3 matrix). For each TAM type (i.e. vector  
1134 of correlation coefficients to each marker), we first ranked the matrix by decreasing correlation coefficient,  
1135 selected only the most significantly associated genes to that type ( $r > 0.1$ ;  $>3$  s.d. above the mean for  
1136 shuffled data), subtracted the second highest correlation coefficient for each subtype-associated gene,  
1137 and then re-ranked the matrix by this corrected value. We repeated this procedure for each TAM subtype  
1138 independently. This ensures that the genes selected are specific to a given TAM subset and do not  
1139 describe general TAM features. The top 30 genes for each were used for scoring and visualization  
1140 (**Supplemental Table S2; Supplemental Figure S6D**).

1141 CAF phenotypes were determined using a similar workflow. To examine fibroblast heterogeneity,  
1142 we removed a subset of adrenal endocrine cells (cluster 4, 40 cells; **Figure 5C**) and then performed PCA  
1143 of mesenchymal cells. PC1 was driven by spillover genes (likely contributed from ambient RNA) and  
1144 lacked any coherent biological program and was not considered further. PCs 2 and 3 by contrast were  
1145 consistent with variable mesenchymal (PC2) and inflammatory (PC3) CAF phenotypes. All these cells  
1146 scored highly for previous myCAF gene expression programs so this phenotype did not fully explain the  
1147 heterogeneity in mesenchymal cells, but did suggest their identity as CAFs. Again, using correlation, we  
1148 determined the genes driving low PC2 scores (Dermal-like), and high PC2 scores (Pericyte-like), as well  
1149 as those associated with the high PC3 scores (Inflammatory). As before, we used the top 30 genes for  
1150 each subset scoring and visualization. These same genes (Dermal-like and Pericyte-like) were used to



1151 examine bulk RNA-seq profiles and their difference in each sample quantifies which phenotype is favored  
1152 in the bulk averages (**Figure 5F**).

1153

1154 **TME associations.** We determined the transcriptional-subtype-dependent composition of the TME  
1155 (**Figure 6A-C**) following two steps. First, we computed the Simpson's Index (measure of ecological  
1156 diversity) using the count of each non-malignant cell type captured from each sample as input (**Figure**  
1157 **6A,B**) and correlated each biopsy's diversity score to its basal vs. classical commitment score.  
1158 Importantly, the number of non-malignant cells captured from each biopsy was not associated with basal  
1159 vs. classical commitment score ( $r = 0.09$ ). Next, to understand which cell types drive these differences,  
1160 we computed the fractional representation for every non-malignant cell type in each core needle biopsy  
1161 and determined their pairwise correlation distance (Pearson's  $r$ ) followed by hierarchical clustering using  
1162 Ward's method (dendrogram in **Figure 6B**). For both of these analyses we only used samples with >200  
1163 non-malignant cells captured (**Supplemental Figure S6L**).

1164

1165 **Matched organoid clustering and cell-typing.** After applying similar quality metrics as above, we  
1166 performed PCA, SNN clustering, and  $t$ -SNE embedding for 31,867 cells including organoid cells and all  
1167 malignant cells from primary PDAC biopsies (PCs 1-50; resolution=1.2; k.param=45; perplexity=45;  
1168 max\_iter=2,500), and identified 39 total clusters. Organoids clustered separately from their matched  
1169 biopsies, suggesting expression and/or CNV related drift in culture. Only two SNN clusters—clusters 4  
1170 and 32—were admixed by sample. We determined the specific gene expression programs in these two  
1171 clusters via differential expression testing by Wilcoxon rank sum test ( $P < 0.05$ , Bonferroni correction;  
1172  $\log(\text{fold change}) > 0.5$ ). These comparisons were done in a "1 versus rest" fashion, testing for genes  
1173 defining each cluster (4 or 32) compared to the entire dataset. Their expression profiles were consistent  
1174 with fibroblasts (cluster 32) and epithelial cells (cluster 4; **Supplemental Figure S5B,C**).

1175

1176 **Correlation distances for genotype and phenotype.** To generate correlation distances for genotype  
1177 and phenotype, each single cell in a biopsy-organoid pair was represented by two vectors of information:  
1178 (i) a phenotype vector containing expression values for basal and classical genes (scCorr basal and  
1179 classical genes,  $n = 60$  genes) and (ii) a genotype vector containing the average CNV score for each  
1180 cytoband. The phenotype and genotype distances between every single cell within a biopsy/early  
1181 organoid pair was computed from these vectors using a correlation-based (Pearson's  $r$ ) distance metric  
1182 of the form  $d = (1-r)/2$ . This resulted in two distance matrices of  $n \times n$  dimension where  $n$  is the total  
1183 number of cells from each biopsy/early organoid sample pair. Values in **Figure 4A** are computed by  
1184 averaging the values for  $d$  between only early organoid and matched biopsy cells.

1185

1186 **Matched biopsy vs. organoid malignant cell comparison.** For CNV-confirmed malignant cells from  
1187 each biopsy and its matched organoid (earliest passage), we used differential expression (Wilcoxon rank  
1188 sum test;  $P < 0.05$ , Bonferroni correction;  $\log(\text{fold change}) > 0.3$ ) to understand the features lost from  
1189 malignant cells in the *in vivo* setting and gained when transitioning into growth in organoid culture. We  
1190 required any gene to be significantly differentially expressed in at least 3 model-biopsy comparisons to  
1191 summarize the consistent changes. We repeated this same workflow for both organoid- and biopsy-  
1192 specific genes (**Supplemental Table S5**) outlined in **Figure 4B** and **Figure 4D-F**, respectively.

1193

1194 **Biopsy paracrine and autocrine subtype-specific factor analysis.** Factors present in the TME but  
1195 absent from organoid culture could originate from at least two sources, the tumor cells themselves  
1196 (autocrine) or non-tumor cells in the local microenvironment (paracrine). We examined any gene with  
1197 gene ontology annotations related to “cytokines”, “chemokines”, or “growth factors” and took the union of  
1198 these lists, yielding 321 genes, 218 of which were detected in our dataset. For “autocrine” factors we  
1199 performed differential expression between malignant cells binned as basal and classical, and then IT vs  
1200 rest. A gene was considered differentially expressed if it passed a  $P < 0.05$  with Bonferroni correction  
1201 and a  $\log(\text{fold change}) > 0.2$  in one of these comparisons. Genes were then assigned to subtypes based  
1202 on the log fold change direction (**Figure 7D**, **Supplemental Table S7**). Paracrine factors were  
1203 determined in a similar manner with slight modifications. We grouped non-tumor cells into basal, classical  
1204 or IT based on the average expression and clustering for malignant programs from their respective tumor  
1205 samples (**Supplemental Figure S3G,H**). We then assessed for differential expression between all cells  
1206 from a given group and the rest using the same cutoffs as above and sorted factors into subtypes based  
1207 on their log fold change directionality (**Figure 7F**, **Supplemental Table S7**). We then visualized which  
1208 cell type contributed the highest average expression for each factor in the cell types from the respective  
1209 TMEs (**Figure 7G**).

1210

1211 **Bulk RNA-sequencing analysis.** FASTQs for bulk RNA expression profiles were downloaded from the  
1212 relevant repository (TCGA, <https://toil.xenahubs.net>; PDAC Cell lines,  
1213 <https://portals.broadinstitute.org/ccle>), available in-house (Panc-Seq, metastatic PDAC), or generated for  
1214 this study (organoid cohort) (Aguirre et al., 2018; Cancer Genome Atlas Research et al., 2013; Cancer  
1215 Genome Atlas Research Network, 2017; Ghandi et al., 2019). All were processed using the same  
1216 pipeline. Briefly, each sample's sequences were marked for duplicates and then mapped to hg38 using  
1217 STAR. After running QC checks using RNAseqQC, gene-level count matrices were generated using  
1218 RSEM. Instructions to run the pipeline are given in the Broad CCLE github repository

1219 [https://github.com/broadinstitute/ccle\\_processing](https://github.com/broadinstitute/ccle_processing). Length-normalized values (TPM) were then  
1220 transformed according to  $\log_2(\text{TPM}+1)$  for downstream analysis. The entire dataset was scaled and  
1221 centered to allow relative comparisons across sample types (e.g. tumors, organoids, and cell lines).  
1222 Signature scores were computed as above (e.g. basal and classical; see **Generation of expression**  
1223 **signatures/scores** above) (Puram et al., 2017).

1224

1225 **Tumor phenotyping from mIF data.** Supervised machine learning algorithms were applied for tissue  
1226 and cell segmentation (inForm 2.4.1, Akoya Biosciences). Single-cell-level imaging data were exported  
1227 and further processed and analyzed using R (v3.6.2). To assign phenotypes to individual tumor epithelial  
1228 cells, mean expression intensity in the relevant subcellular compartment was first used to classify cells  
1229 as positive or negative for each of the 5 markers. Combinatorial expression patterns for the five markers  
1230 were then used to phenotypically classify cells as basal, classical, co-expressing / IT or marker negative  
1231 (3 combinations of 2 basal markers, 7 combinations of 3 classical markers, 1 pan-marker negative, 21  
1232 combinations of co-expression of basal and classical markers, **Supplemental Figure S4A,**  
1233 **Supplemental Table S4**). Tumor subtype composition was assessed by calculating the fraction of total  
1234 tumor cells positive for each cell phenotype (**Supplemental Figure S4B**, excluding pan-marker negative  
1235 cells).

1236 **SUPPLEMENTAL INFORMATION**

1237

1238 **Supplemental Table S1. Cohort patient characteristics.**

1239 *Related to Figure 1*

1240

1241 **Supplemental Table S2. Normal cell type markers.**

1242 *Related to Figures 1, 5 & 6*

1243

1244 **Supplemental Table S3. Malignant phenotype single-cell gene correlates.**

1245 *Related to Figure 2*

1246

1247 **Supplemental Table S4. mIF marker combinations and cell counts.**

1248 *Related to Figure 2*

1249

1250 **Supplemental Table S5. Organoid- and in vivo malignant-specific gene expression features.**

1251 *Related to Figure 4*

1252

1253 **Supplemental Table S6. Organoid and cell line models and media formulations for perturbation  
1254 experiments.**

1255 *Related to Figure 7*

1256

1257 **Supplemental Table S7. Subtype-specific autocrine and paracrine secreted factors.**

1258 *Related to Figure 7*

### Supplemental Table S1, related to Figure 1. Cohort patient characteristics

This table details the demographic and clinical characteristics of patients whose biopsy samples were used in this study.

| Sample (scRNA-seq ID)                 | Patient age at initial diagnosis | Gender | Ethnicity | Stage at initial diagnosis | Histology | Site of biopsy | Number of cores collected | Number of cores for scRNA-seq/organoids | Treatment of primary disease                             | Metastatic treatments prior to biopsy                                            | Patient status (alive/deceased) | Survival time from initial diagnosis (days) <sup>1</sup> |
|---------------------------------------|----------------------------------|--------|-----------|----------------------------|-----------|----------------|---------------------------|-----------------------------------------|----------------------------------------------------------|----------------------------------------------------------------------------------|---------------------------------|----------------------------------------------------------|
| PANFR0383                             | 76                               | Male   | Caucasian | Metastatic                 | PDAC      | Liver          | 7                         | 2                                       | None                                                     | Gemcitabine/Nab-paclitaxel/Anti-hepatocyte growth factor antibody                | Deceased                        | 302                                                      |
| PANFR0489 and PANFR0489R <sup>2</sup> | 67                               | Female | Caucasian | Localized                  | PDAC      | Liver          | 6                         | 2                                       | Whipple; FOLFOX/Nab-paclitaxel; Capecitabine + radiation | Gemcitabine/Nab-paclitaxel; Gemcitabine; 5-FU/Liposomal irinotecan; FOLFOX       | Deceased                        | 2068                                                     |
| PANFR0526                             | 72                               | Male   | Caucasian | Metastatic                 | PDAC      | Liver          | 5                         | 2                                       | None                                                     | None                                                                             | Deceased                        | 10                                                       |
| PANFR0543                             | 65                               | Male   | Caucasian | Metastatic                 | PDAC      | Liver          | 7                         | 5                                       | None                                                     | None                                                                             | Deceased                        | 120                                                      |
| PANFR0545                             | 75                               | Female | Caucasian | Metastatic                 | PDAC      | Liver          | 5                         | 2                                       | None                                                     | None                                                                             | Deceased                        | 94                                                       |
| PANFR0552                             | 49                               | Female | Caucasian | Localized                  | PDAC      | Liver          | 4                         | 2                                       | FOLFIRINOX; Whipple; Gemcitabine/Nab-paclitaxel          | None                                                                             | Deceased                        | 536                                                      |
| PANFR0557                             | 44                               | Female | Caucasian | Localized                  | PDAC      | Liver          | 4                         | 3                                       | Distal pancreatectomy; Gemcitabine/Capecitabine          | FOLFIRINOX; FOLFIRI                                                              | Deceased                        | 1291                                                     |
| PANFR0562                             | 76                               | Female | Other     | Metastatic                 | PDAC      | Liver          | 5                         | 2                                       | None                                                     | None                                                                             | Deceased                        | 111                                                      |
| PANFR0575                             | 79                               | Female | Asian     | Metastatic                 | PDAC      | Liver          | 5                         | 2                                       | None                                                     | None                                                                             | Deceased                        | 32                                                       |
| PANFR0576                             | 63                               | Male   | Caucasian | Metastatic                 | PDAC      | Liver          | 5                         | 2                                       | None                                                     | None                                                                             | Deceased                        | 159                                                      |
| PANFR0578                             | 62                               | Female | Caucasian | Metastatic                 | PDAC      | Liver          | 4                         | 1                                       | None                                                     | FOLFIRINOX; Lung metastatectomy; FOLFIRINOX; 5-FU + radiation; Olaparib; Whipple | Alive                           | 1863                                                     |
| PANFR0580                             | 53                               | Male   | Caucasian | Metastatic                 | PanNET    | Liver          | 6                         | 2                                       | None                                                     | None                                                                             | Alive                           | 687                                                      |
| PANFR0583                             | 61                               | Male   | Caucasian | Metastatic                 | PDAC      | Liver          | 5                         | 2                                       | None                                                     | None                                                                             | Deceased                        | 52                                                       |
| PANFR0588                             | 71                               | Female | Caucasian | Metastatic                 | PDAC      | Peritoneum     | 6                         | 2                                       | None                                                     | None                                                                             | Deceased                        | 227                                                      |
| PANFR0592                             | 37                               | Male   | Caucasian | Locally advanced           | PDAC      | Liver          | 4                         | 2                                       | FOLFIRINOX; Whipple                                      | None                                                                             | Deceased                        | 376                                                      |



|           |    |        |           |            |      |               |    |   |                                   |                                        |          |                            |
|-----------|----|--------|-----------|------------|------|---------------|----|---|-----------------------------------|----------------------------------------|----------|----------------------------|
| PANFR0593 | 63 | Male   | Caucasian | Localized  | PDAC | Liver         | 4  | 2 | Distal pancreatectomy; FOLFIRINOX | Gemcitabine/Nab-paclitaxel/Trastuzumab | Alive    | 199<br>(lost to follow up) |
| PANFR0598 | 75 | Male   | Caucasian | Metastatic | PDAC | Omentum       | 7  | 2 | None                              | None                                   | Alive    | 586                        |
| PANFR0604 | 67 | Female | Caucasian | Metastatic | PDAC | Liver         | 8  | 2 | None                              | FOLFIRINOX                             | Deceased | 952                        |
| PANFR0605 | 75 | Male   | Caucasian | Metastatic | PDAC | Liver         | 8  | 3 | None                              | None                                   | Deceased | 322                        |
| PANFR0631 | 66 | Male   | Caucasian | Metastatic | PDAC | Liver         | 12 | 2 | None                              | None                                   | Alive    | 566                        |
| PANFR0635 | 76 | Female | Caucasian | Metastatic | PDAC | Omentum       | 7  | 3 | None                              | None                                   | Alive    | 512                        |
| PANFR0637 | 65 | Male   | Caucasian | Metastatic | PDAC | Adrenal gland | 4  | 2 | None                              | None                                   | Deceased | 149                        |

#### Footnotes

1. Patient survival was calculated as time from initial diagnosis to death or last documented follow up for patients who are alive.
2. This patient had two samples, PANFR0489 and PANFR0489R, collected at different time points along their treatment course.

# Supplemental Figure S1 related to Figure 1

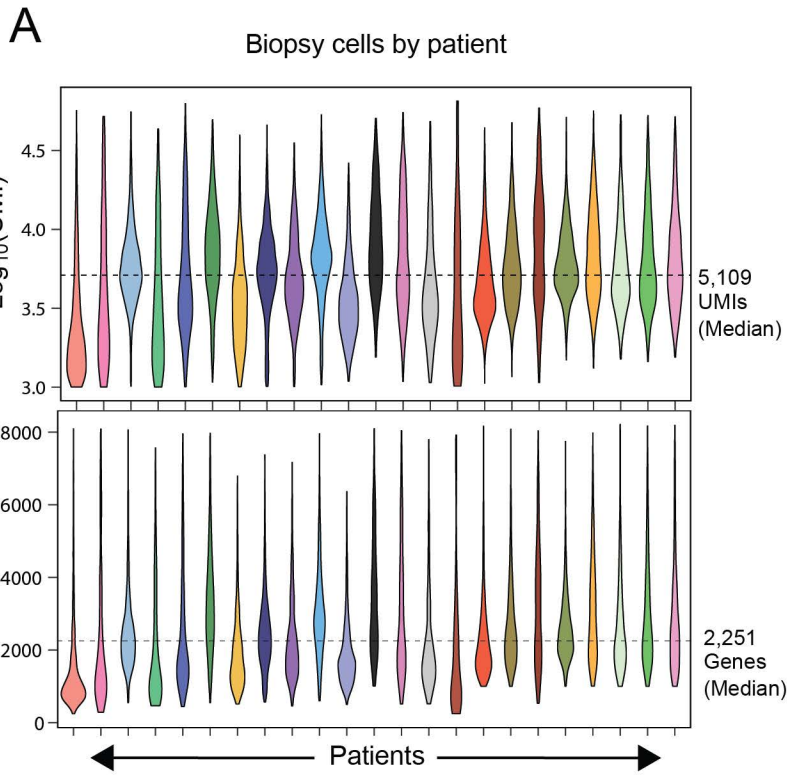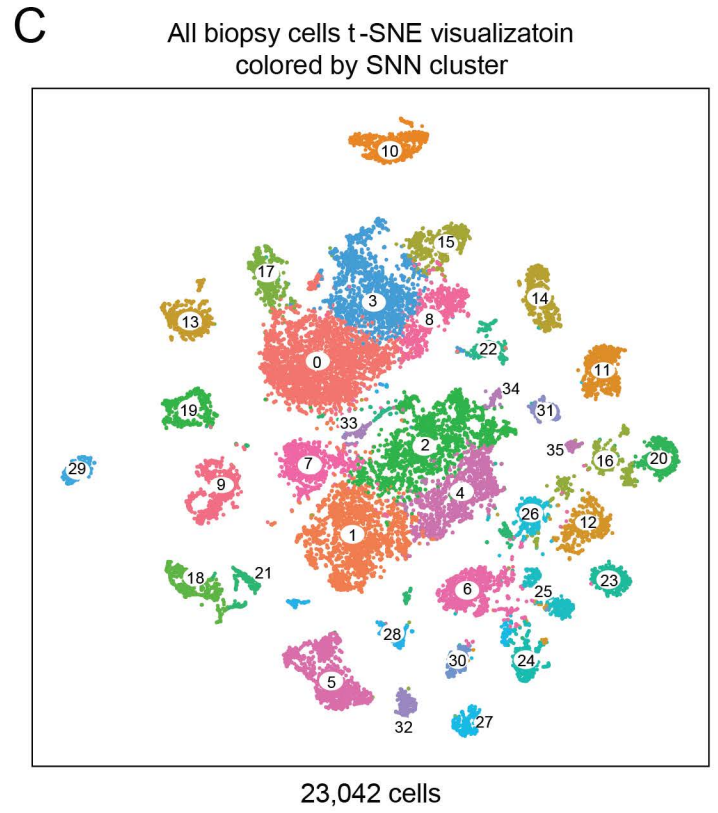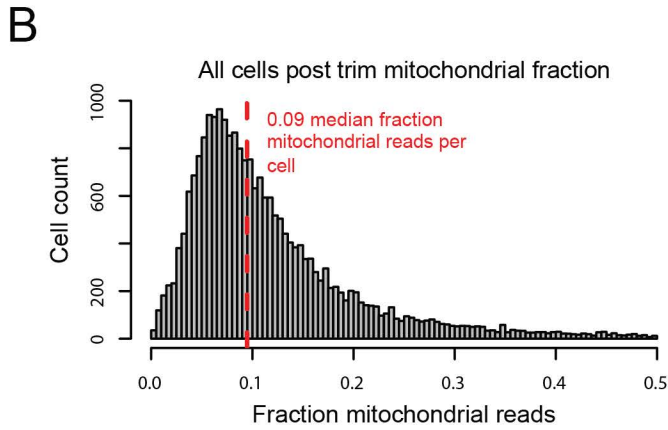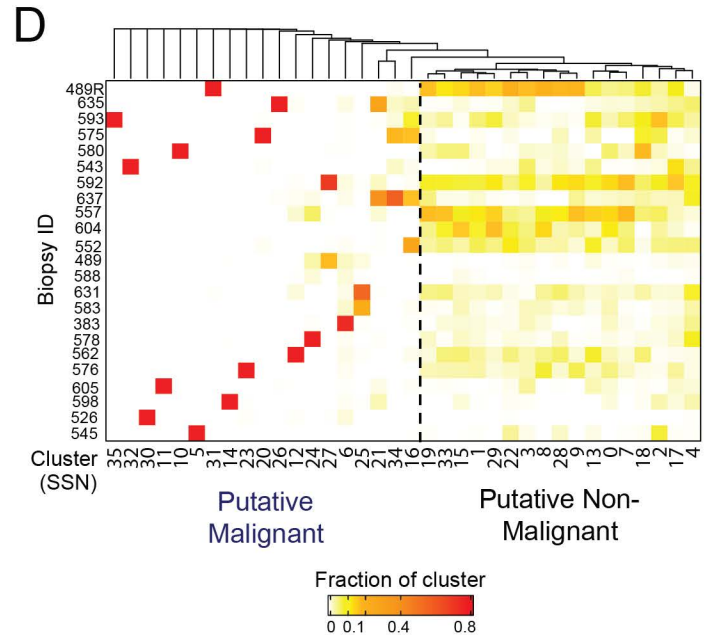

# Supplemental Figure S1 related to Figure 1

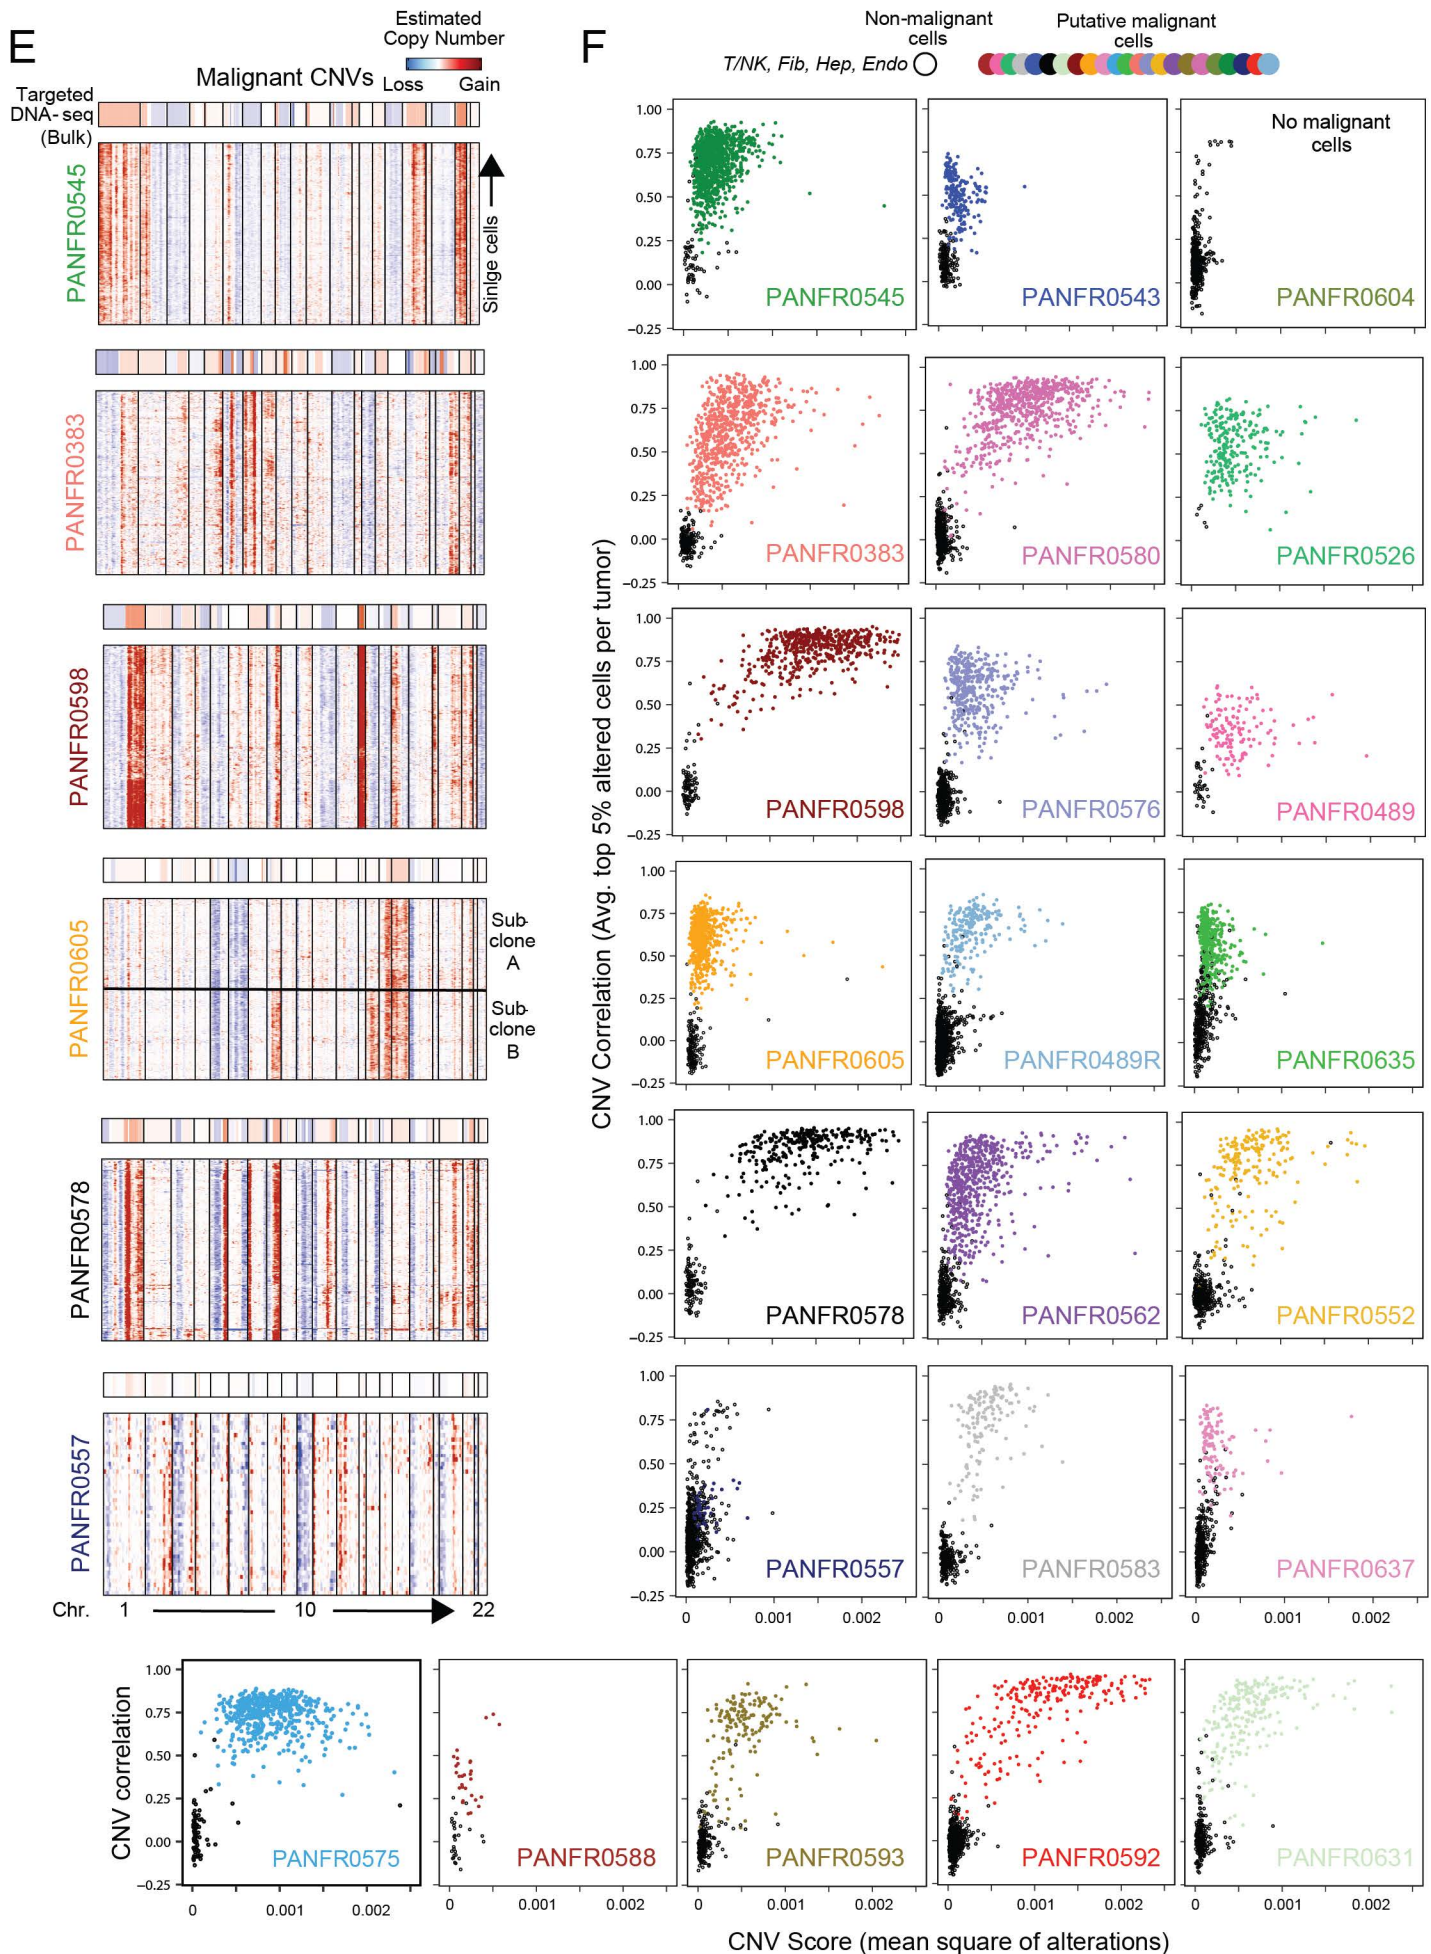



# Supplemental Figure S1 related to Figure 1

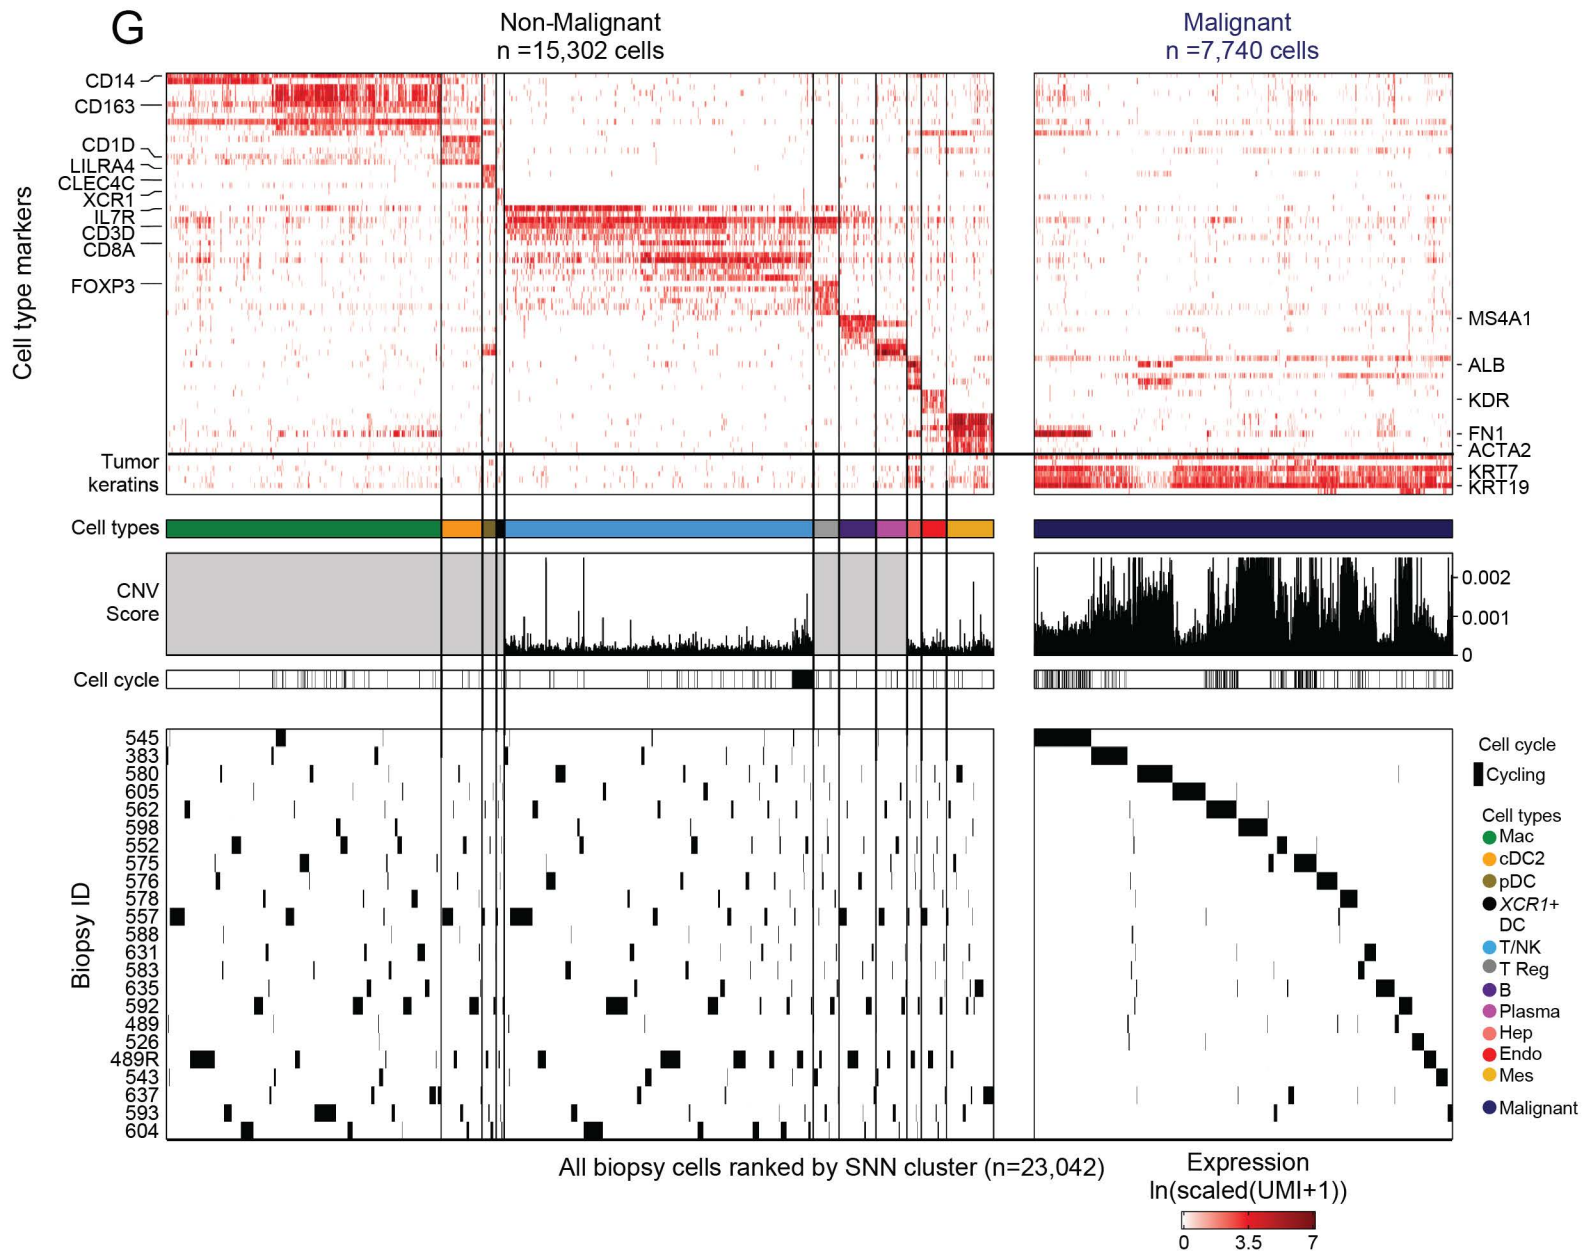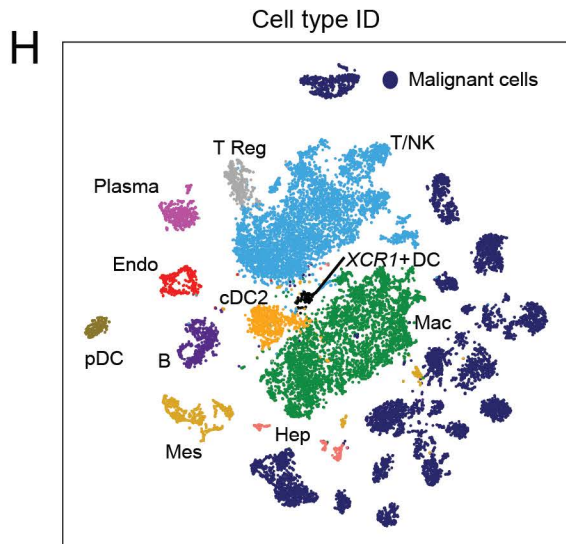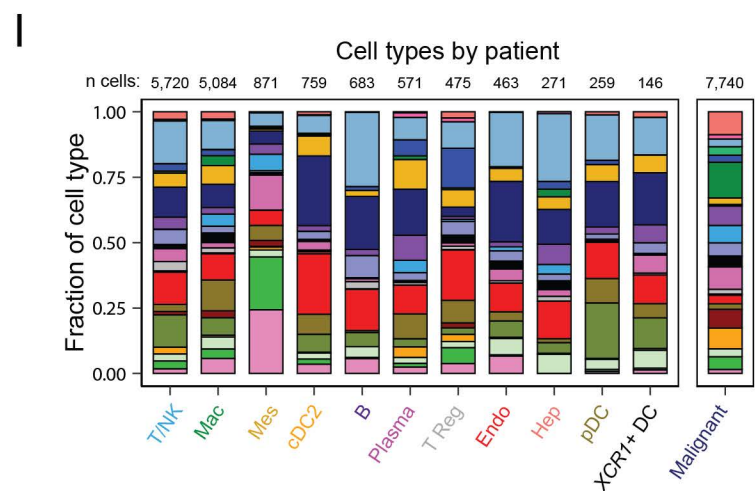

1259 **Supplemental Figure S1. Quality metrics, unsupervised cell type identification, and malignant cell**  
1260 **confirmation across the biopsy cohort.**

1261 *Related to Figure 1*

1262 **A**, Distribution of unique molecules and genes captured in quality cells per biopsy, median values are  
1263 indicated for each metric (dotted line) and violin plots are colored by patient (top,  $\text{Log}_{10}(\text{UMIs})$ ; bottom,  
1264 number of genes).

1265 **B**, Distribution of fraction mitochondrial reads across the entire trimmed biopsy dataset ( $n = 23,042$  cells).  
1266 Red dotted line denotes the median.

1267 **C**, *t*-SNE visualization of the entire single-cell biopsy dataset colored by the SNN clusters identified (inset  
1268 numbers).

1269 **D**, Distribution of single cells captured per biopsy across the identified SNN clusters. In general, a  
1270 patient's malignant cells are expected to form unique clusters driven by CNVs. Owing to this feature, the  
1271 data are split into putative malignant and non-malignant groups of clusters.

1272 **E**, Heatmaps represent select scRNA-seq-derived copy number profiles where expression across the  
1273 transcriptome is organized by chromosome (columns) for each single putative malignant cell (rows) from  
1274 a given biopsy. Top bar indicates reference bulk targeted DNA-seq for the same patient and shows strong  
1275 concordance with the single-cell derived profiles.

1276 **F**, CNV correlation (averaged top 5% of altered cells per biopsy) versus CNV score (mean square of  
1277 modified expression) for each single putative malignant (colored points) and reference normal cell (empty  
1278 black circles) within a given biopsy. Only a single sample, PANFR0604, did not contain any malignant  
1279 cells.

1280 **G**, Overview of cell-typing for all cells in the biopsy dataset. Cells are ordered by SNN cluster and  
1281 separated by cell types. Top heatmap represent expression levels for a subset of select markers ( $n=73$   
1282 genes) used to identify cell types. Color bar indicates cell types and binarized cell cycle phenotypes are  
1283 labeled (black, cycling; white, not). CNV scores (mean square of alterations per cell) used to parse  
1284 malignant from non-malignant are shown using T/NK, endothelial, fibroblasts, and hepatocytes as  
1285 reference; grey boxes denote normal cell types where we did not compute reference CNV scores. Bottom  
1286 panel shows biopsy of origin for each cell. The data are split by non-malignant ( $n = 15,302$ ) and malignant  
1287 (7,740) identity.

1288 **H**, *t*-SNE visualization as in **S1C** but colored by cell types identified, abbreviations as in **Figure 1D**.

1289 **I**, Fraction of each cell type contributed by each biopsy sample (color fill, patient ID; as in **Figure 1B**), cell  
1290 type totals are noted at the top of each bar.



# Supplemental Figure 22 related to Figures 1 & 2

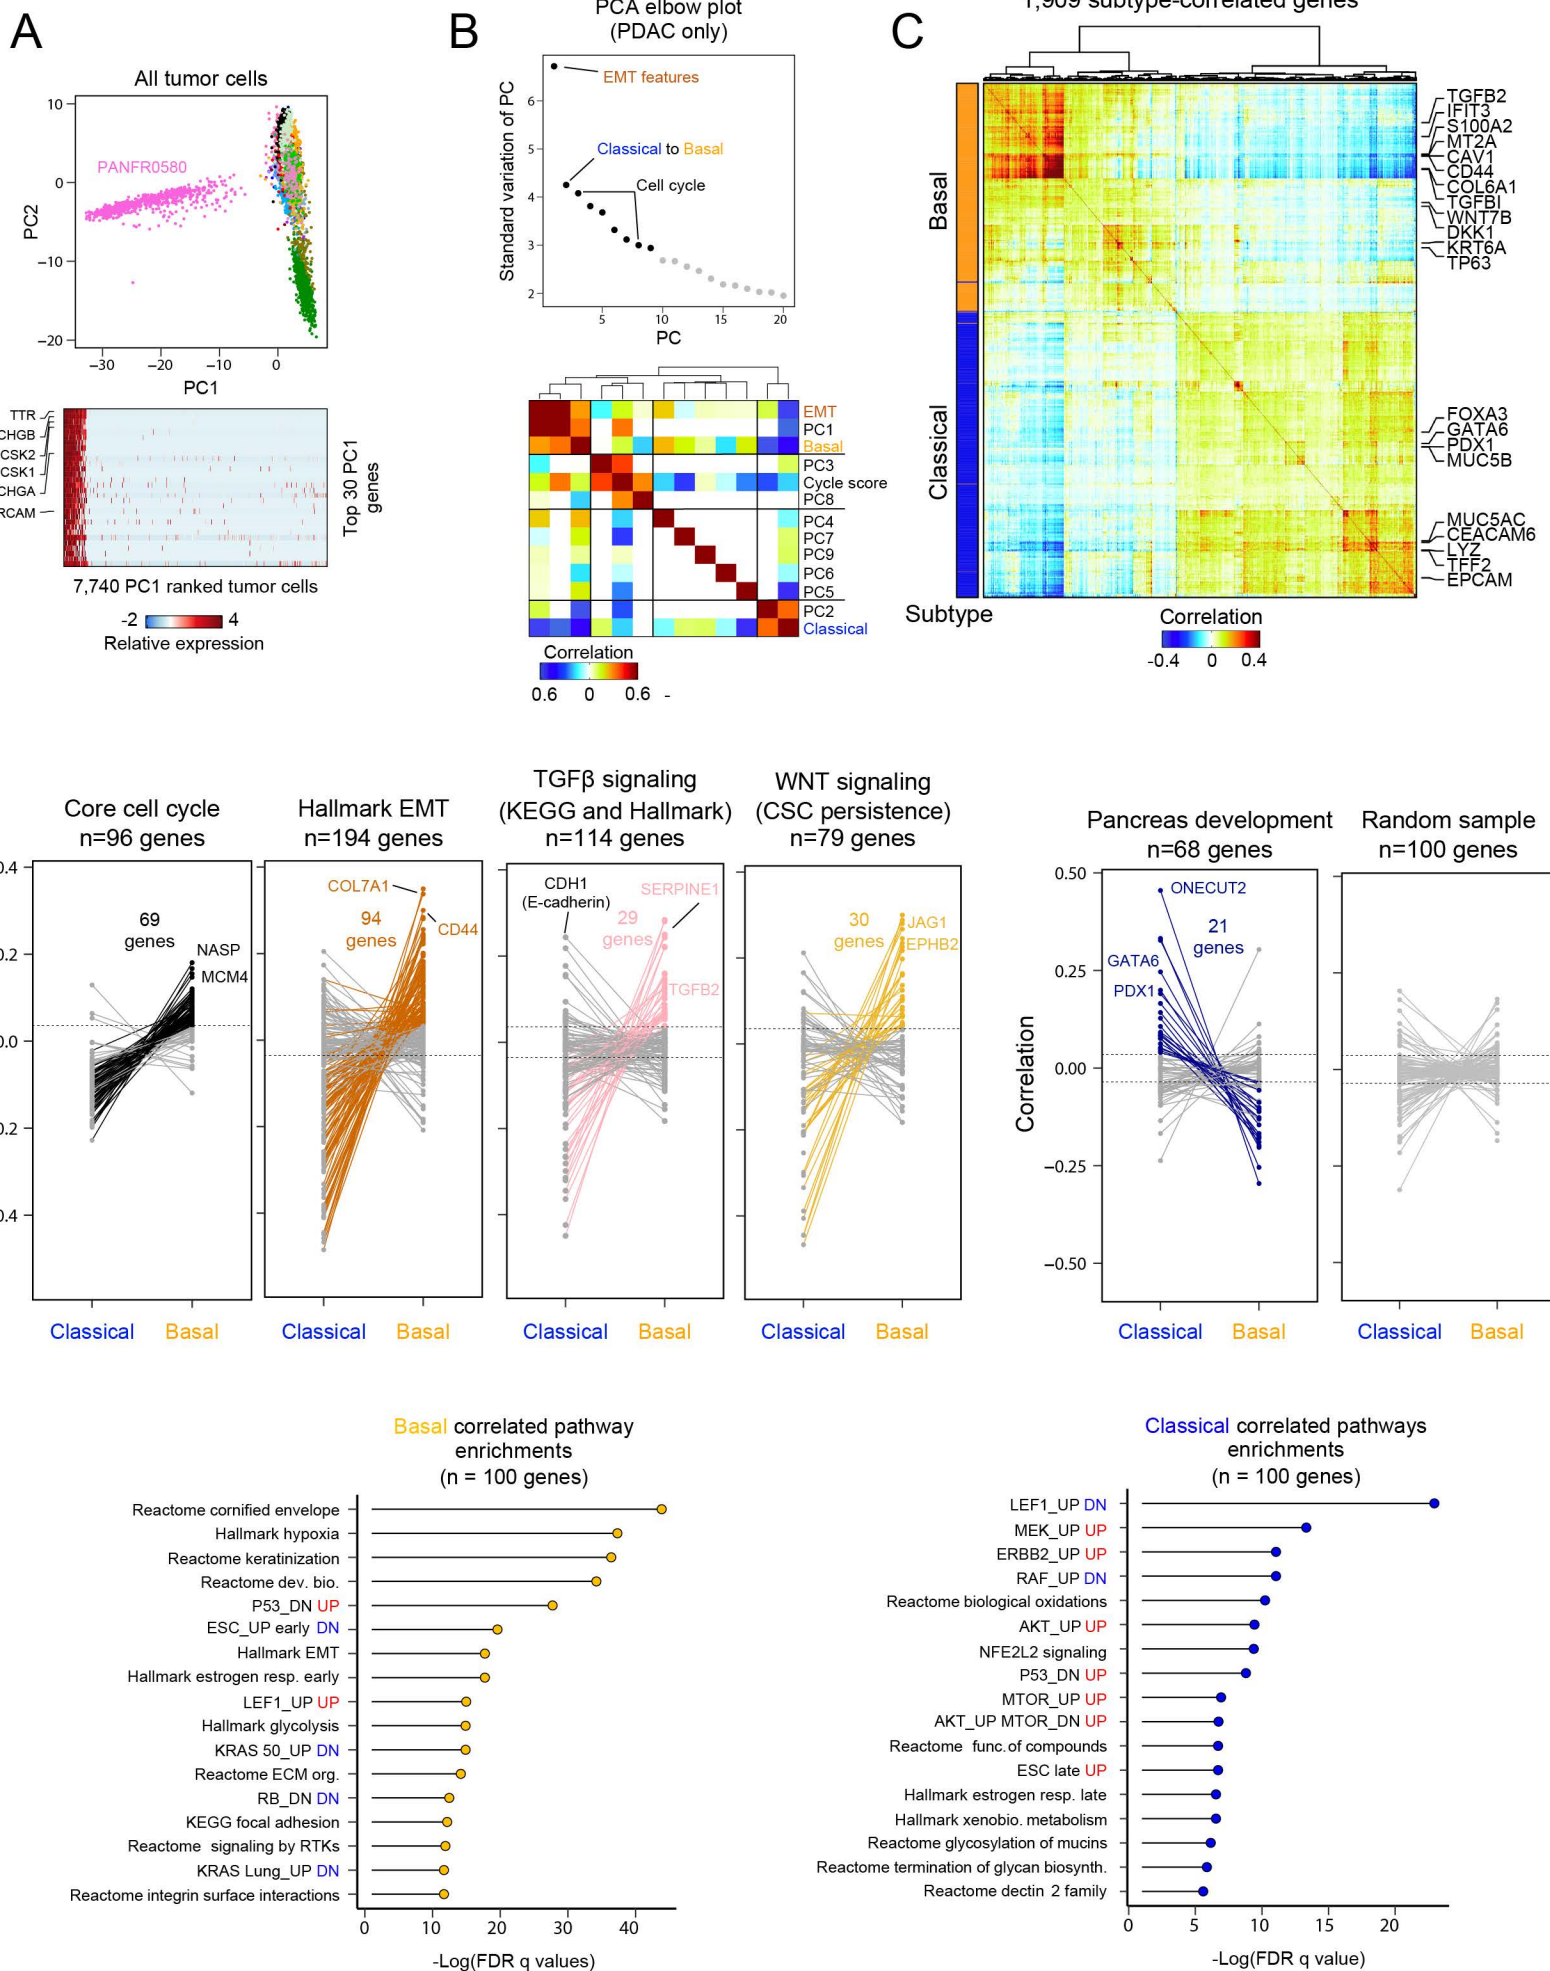

1291 **Supplemental Figure S2. Identifying and contextualizing basal and classical associated biology.**

1292 *Related to Figures 1 & 2*

1293 **A**, Principal component analysis (PCA) and scatter plot for PC1 and PC2 across all malignant cells  
1294 (n=7,740) separates PANFR0580's malignant cells (n=662) from the rest of the samples. Cells are  
1295 colored by patient ID (as in **Figure 1B**). Heatmap for genes with the strongest negative loading on PC1  
1296 (n=30) denote a neuroendocrine identity (*TTR*, *CHGB*). This tumor was later classified by histology as a  
1297 pancreatic neuroendocrine tumor (PanNET).

1298 **B**, Principal component (PC) elbow plot showing the standard deviation for the first 20 components  
1299 calculated over the verified PDAC malignant cell variable genes (**Methods**). Line is drawn at the putative  
1300 "elbow" (black versus grey points) as inclusion of additional PCs described overlapping information or  
1301 quality metrics. Cross-correlational analysis for each single-cell's embeddings across first 9 PCs (black  
1302 points) and scores for literature curated gene sets describing EMT, classical and basal, and cell cycle  
1303 phenotypes. PC1 positively correlates with EMT, basal, and to a degree, cell cycling. Cells with positive  
1304 embeddings on PC2 are correlated with classical phenotypes and anti-correlated with basal and EMT  
1305 phenotypes, suggesting these phenotypes are anti-correlated across a continuum of expression. PC3  
1306 and PC8 describe cells with high cell cycle scores. The other PCs do not associate significantly with  
1307 these phenotypes.

1308 **C**, Pairwise correlation of genes significantly associated with basal (PC1/negative PC2) or classical (PC2)  
1309 expression states. Left bar indicates the subtype association of each gene (orange, basal; blue,  
1310 classical).

1311 **D**, Tied dot plots depicting the correlation coefficient for each gene (points) to either basal or classical  
1312 phenotypes from select literature-derived gene sets, indicated at the top of each plot, which summarize  
1313 aspects of subtype associated biology. Dotted lines represent significance threshold (3 SD above the  
1314 mean of shuffled data), points and lines are colored if that gene passes the threshold and select genes  
1315 are indicated.

1316 **E**, GSEA pathway enrichments for top 100 genes correlated to either basal or classical expression  
1317 scores.

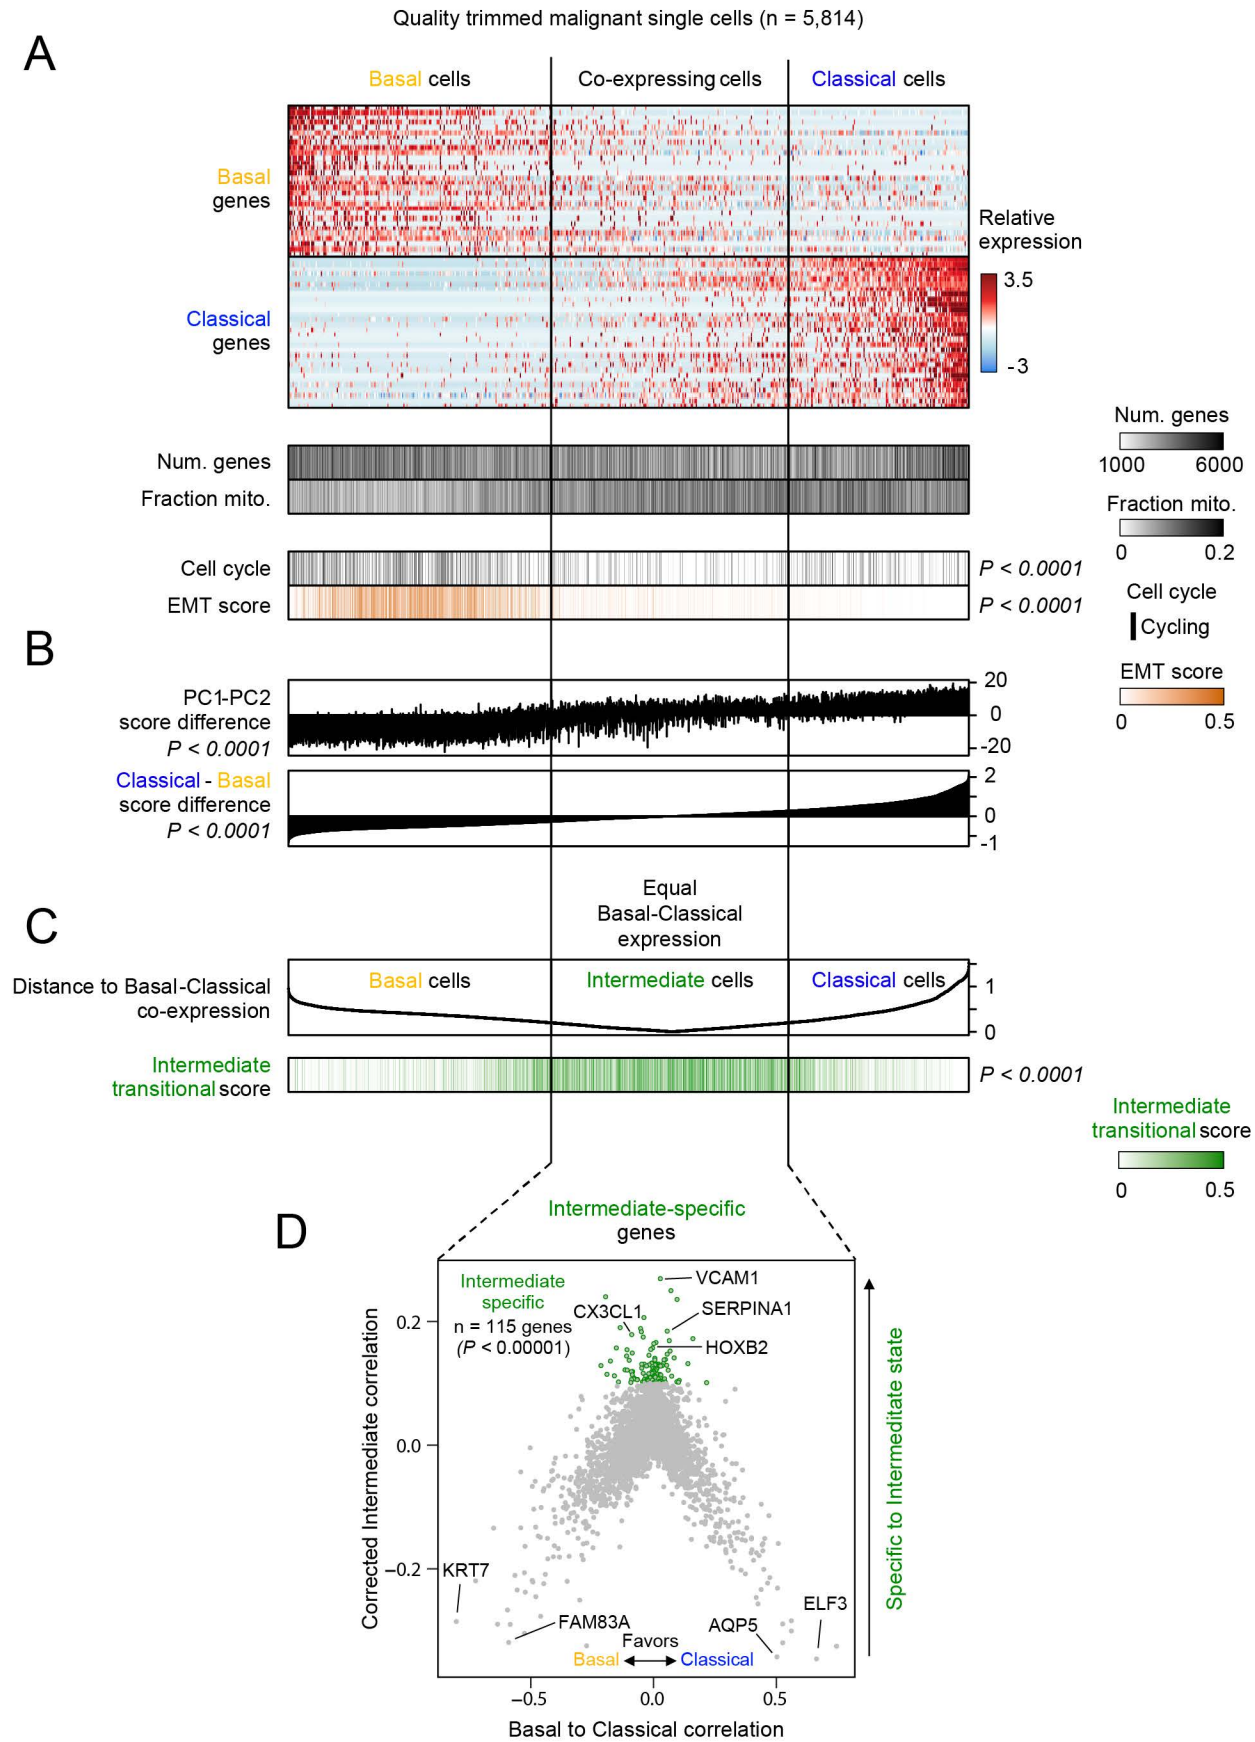



# Supplemental Figure S3 related to Figure 2

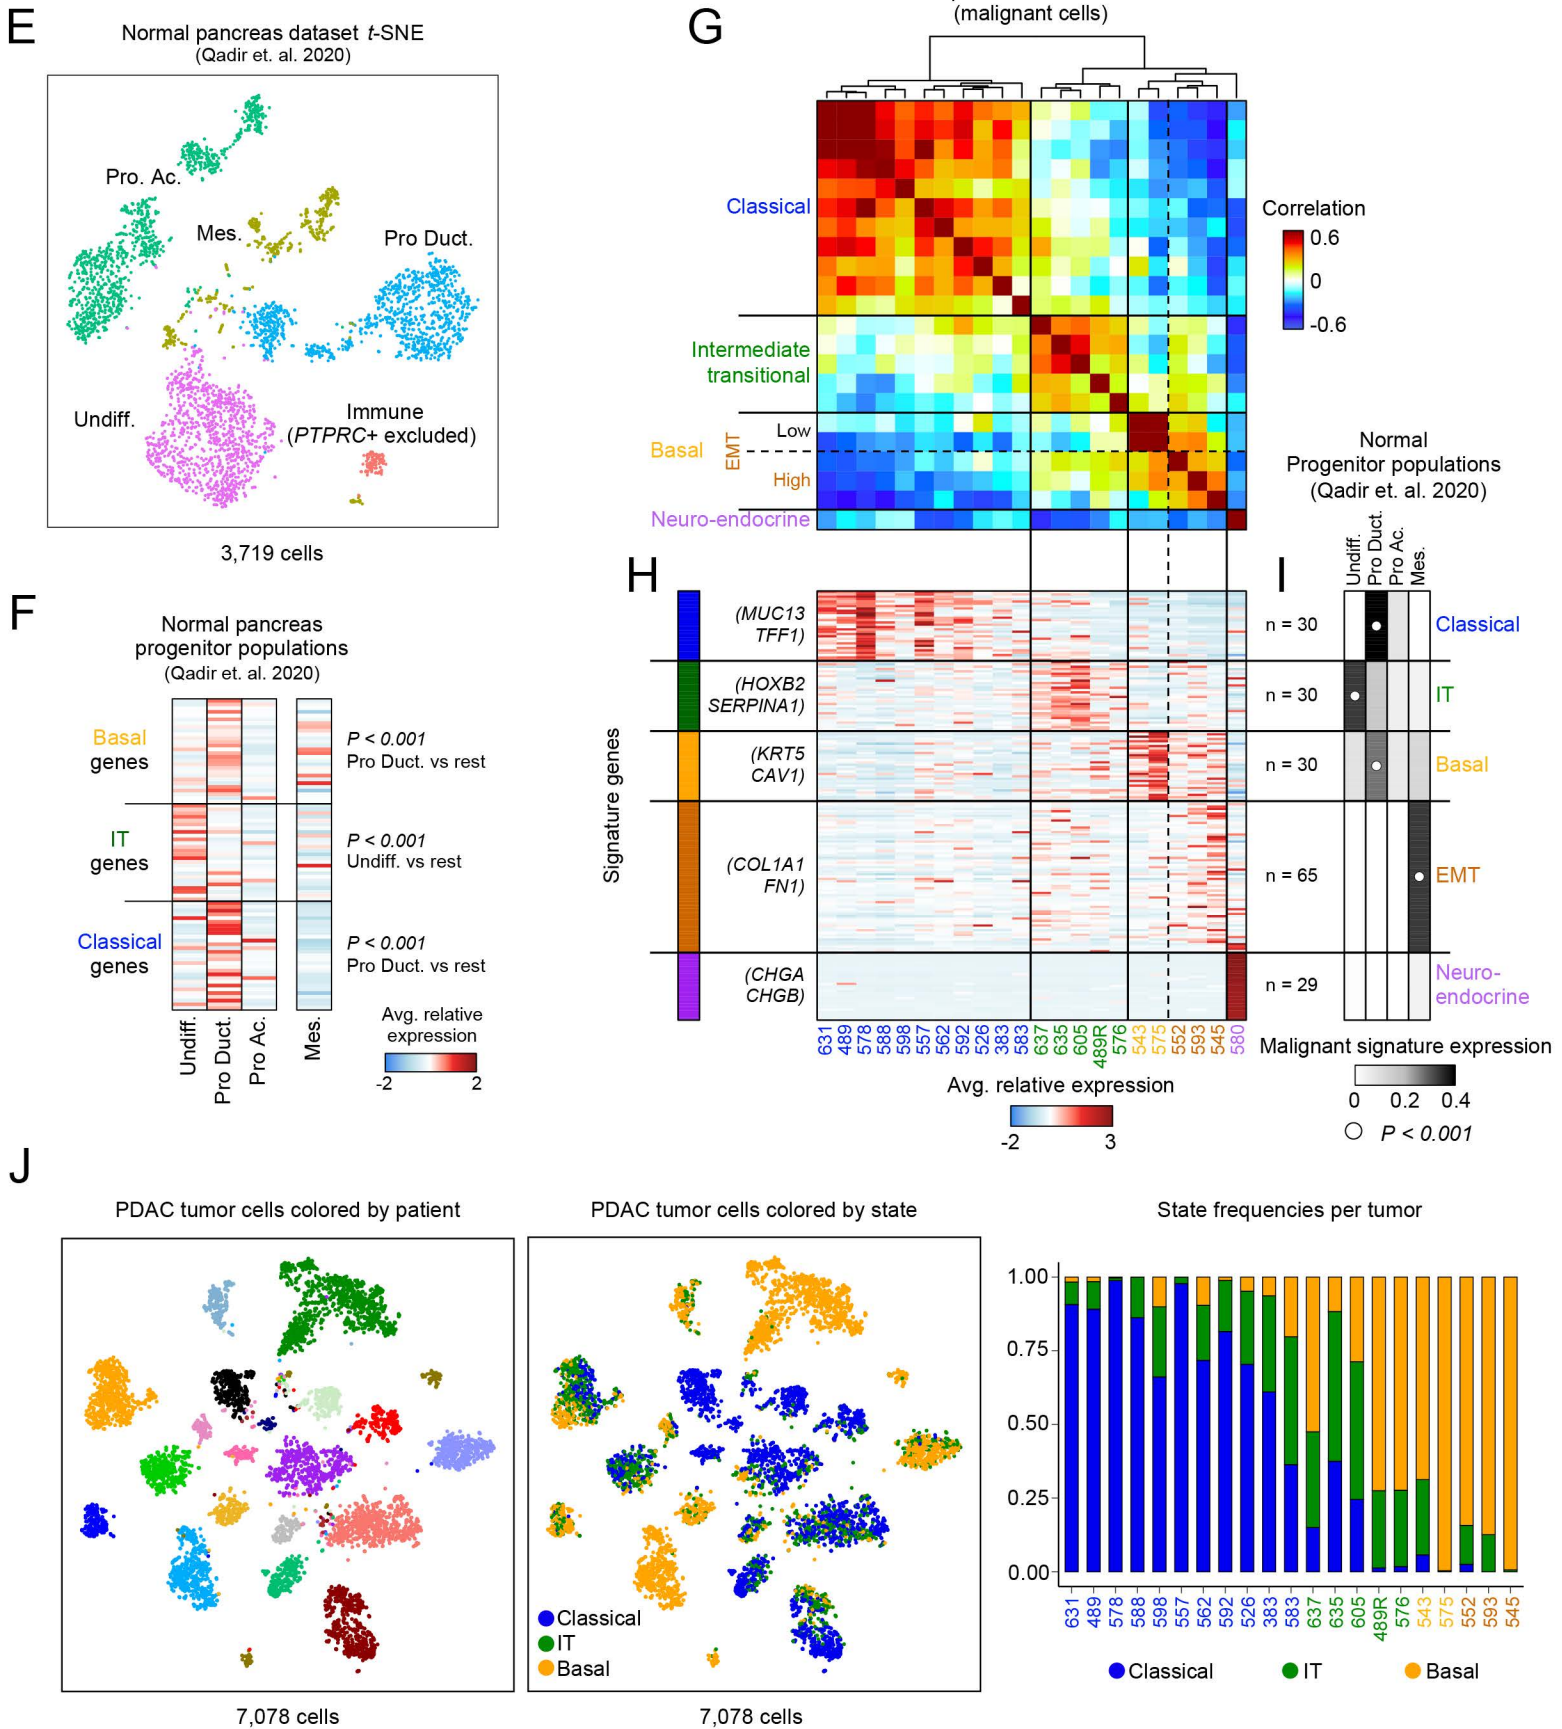

1318 **Supplemental Figure S3. Cells with intermediate co-expressing phenotypes express a distinct**  
1319 **gene program.**

1320 *Related to Figure 2*

1321 **A**, Expression of basal and classical gene programs, with cells ordered by their basal-classical score  
1322 difference. Quality metrics, EMT scores and the binarized cell cycle program are shown for each single  
1323 cell below the heatmap.

1324 **B**, PC1 and 2 difference (top) and Classical – Basal score difference (bottom) are shown. Cells with equal  
1325 basal and classical expression are associated with intermediate PC scores and cells are ordered as in  
1326 **S3A**.

1327 **C**, Euclidian distance for each cell to co-expression ( $y = x$ ) of basal ( $x$ ) and classical ( $y$ ) expression scores.  
1328 Bottom track indicates the score derived from the genes specific to the intermediate state shown in **S3D**  
1329 and explained in **Methods**.

1330 **D**, Gene correlation to either basal or classical score ( $x$  axis) or the corrected intermediate correlation  
1331 (Euclidean distance in **S3C**, **Methods**). Green highlighted genes have corrected intermediate correlation  
1332  $>0.1$  ( $P < 0.00001$  above shuffled).  $P$ -value for binarized cycling group differences in **S3A** was calculated  
1333 using Fisher's Exact test.  $P$ -values for EMT score in **S3A** and group differences in **S3B** and **S3C** were  
1334 calculated by Kruskal-Wallis test with multiple hypothesis correction.

1335 **E**,  $t$ -SNE visualization after dimensionality reduction and re-clustering for the normal progenitor  
1336 populations identified in Qadir et al., 2020. Cell types are collapsed to those favoring Acinar (Pro Ac.),  
1337 Ductal (Pro Duct.), or Undifferentiated (Undiff.) subsets. Mesenchymal cells (Mes.) are included as a non-  
1338 epithelial reference and the small subset of immune cells was excluded from the comparisons.

1339 **F**, Averaged expression of all three malignant programs in normal pancreatic progenitor niche subsets  
1340 and mesenchymal cells defined in Qadir et al., 2020.  $P$ -values for each set of genes are computed by  
1341 Kruskal-Wallis test with multiple hypothesis correction.

1342 **G**, Pairwise correlation for biopsies with malignant cells ( $n = 22$ ). Data are correlation coefficients for the  
1343 average expression of all signature genes in the malignant cells from a given biopsy. EMT genes are  
1344 from Groger et al., 2012. Clade identities are at left with the one PanNET tumor (PANFR0580) included  
1345 for comparison and PANFR0604 not included due to lack of malignant cells captured.

1346 **H**, Average expression for the 184 genes used for clustering in **S3G**. Clade identity colors match text  
1347 color in **S3G** and individual samples (columns) are ordered as in **S3G** and sample ID numbers are  
1348 provided below.

1349 **I**, Scores for the expression of genes in **S3H** (grey scale heat) across the 4 main cell types found in the  
1350 pancreatic progenitor niche (Qadir et al., 2020). White dot indicates the normal subset with the highest



1351 average expression for each malignant program (Kruskal-Wallis test), none of the normal subsets  
1352 significantly express the Neuroendocrine gene signature.  
1353 **J**, *t*-SNE visualization for malignant single cells in the biopsy cohort demonstrates intratumoral  
1354 transcriptional heterogeneity at the single-cell level. Cells are colored by patient (left) or by transcriptional  
1355 subtype (right).

# Supplemental Figure S4, related to Figure 2

A

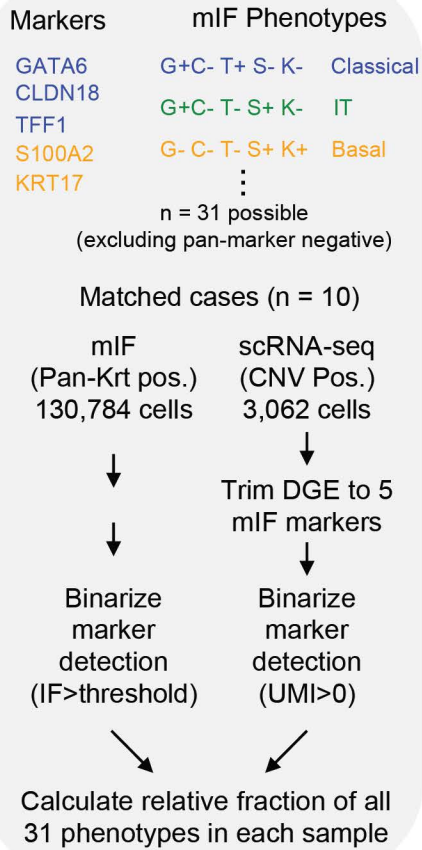

C

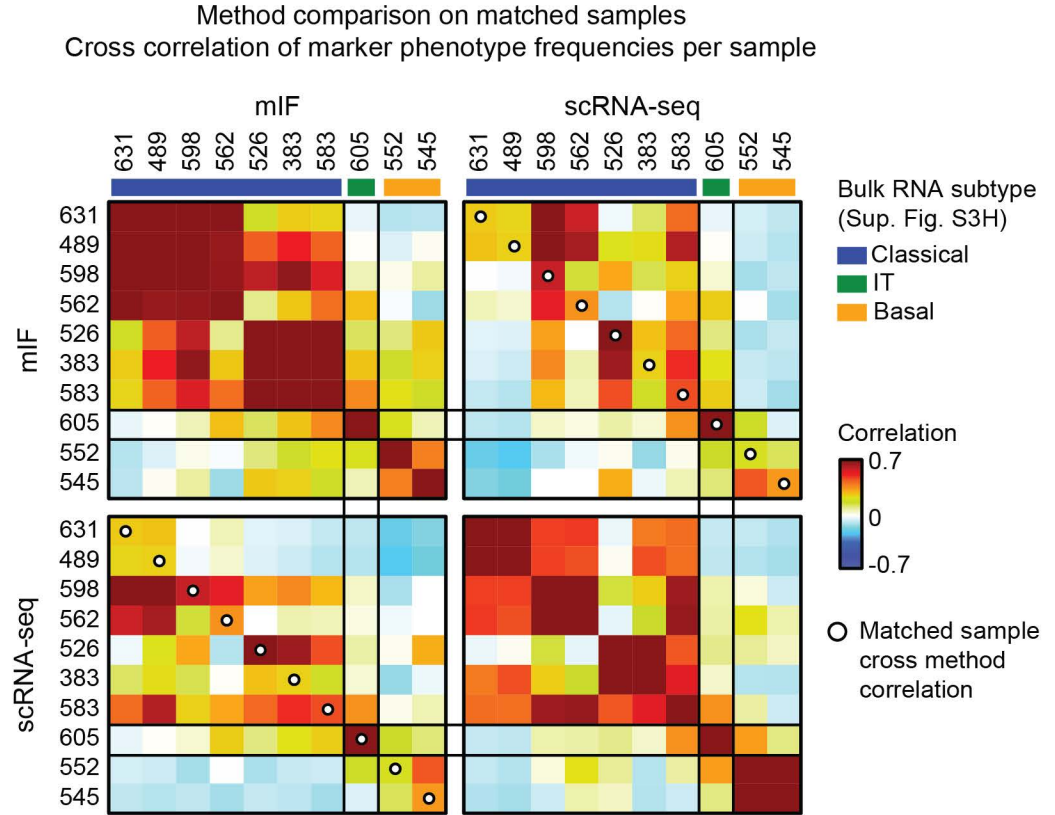

B

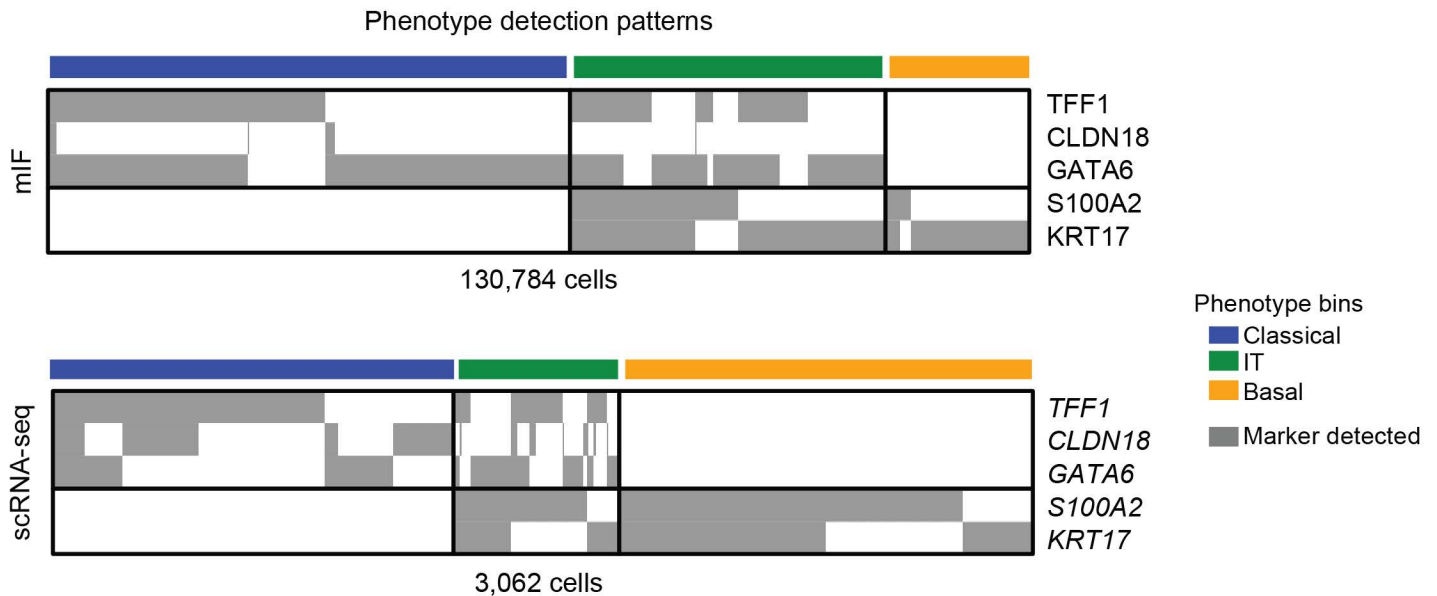

D

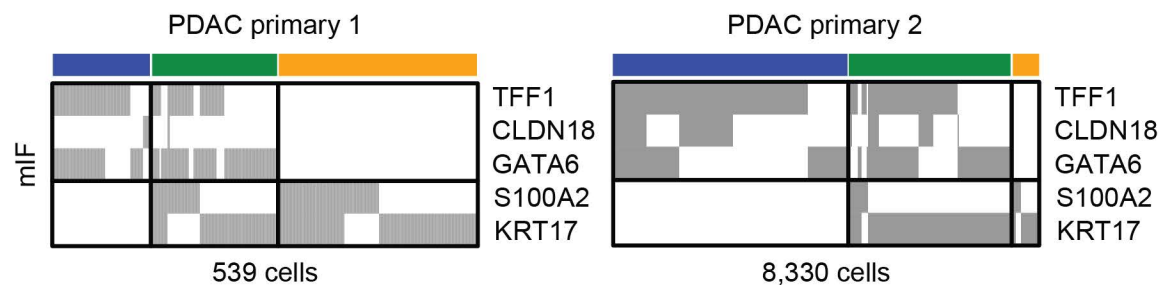

1356 **Supplemental Figure S4. Multiplex immunofluorescence is concordant with scRNA-seq and**  
1357 **demonstrates intratumoral heterogeneity with the presence of IT cells.**

1358 *Related to Figure 2*

1359 **A**, Schematic for comparison of the matched datasets by combinatorial marker phenotypes.

1360 **B**, Marker detection in each single cell from the 10 samples in the mIF (top, 130,784 cells) and matched  
1361 scRNA-seq datasets (bottom, 3,062 cells). Cells are sorted by their combinatorial phenotype outlined in  
1362 **S4A**.

1363 **C**, Comparison within and between modalities on matched samples. Samples are sorted by the  
1364 dendrogram in **Supplemental Figure S3G** and labeled with their pseudo-bulk RNA subtype identity.  
1365 Correlation is performed over the fractional representation of each mIF phenotype (**S4A**) in each biopsy.  
1366 Despite measuring different molecules (protein vs mRNA), the two approaches were highly concordant  
1367 within RNA subtypes and on a case-by-case basis (white dots).

1368 **D**, mIF marker detection in each single cell from two primary PDAC samples shown in **Figure 2H**. Cells  
1369 are sorted by their combinatorial phenotype outlined in **S4A**.

# Supplemental Figure S5, related to Figure 4

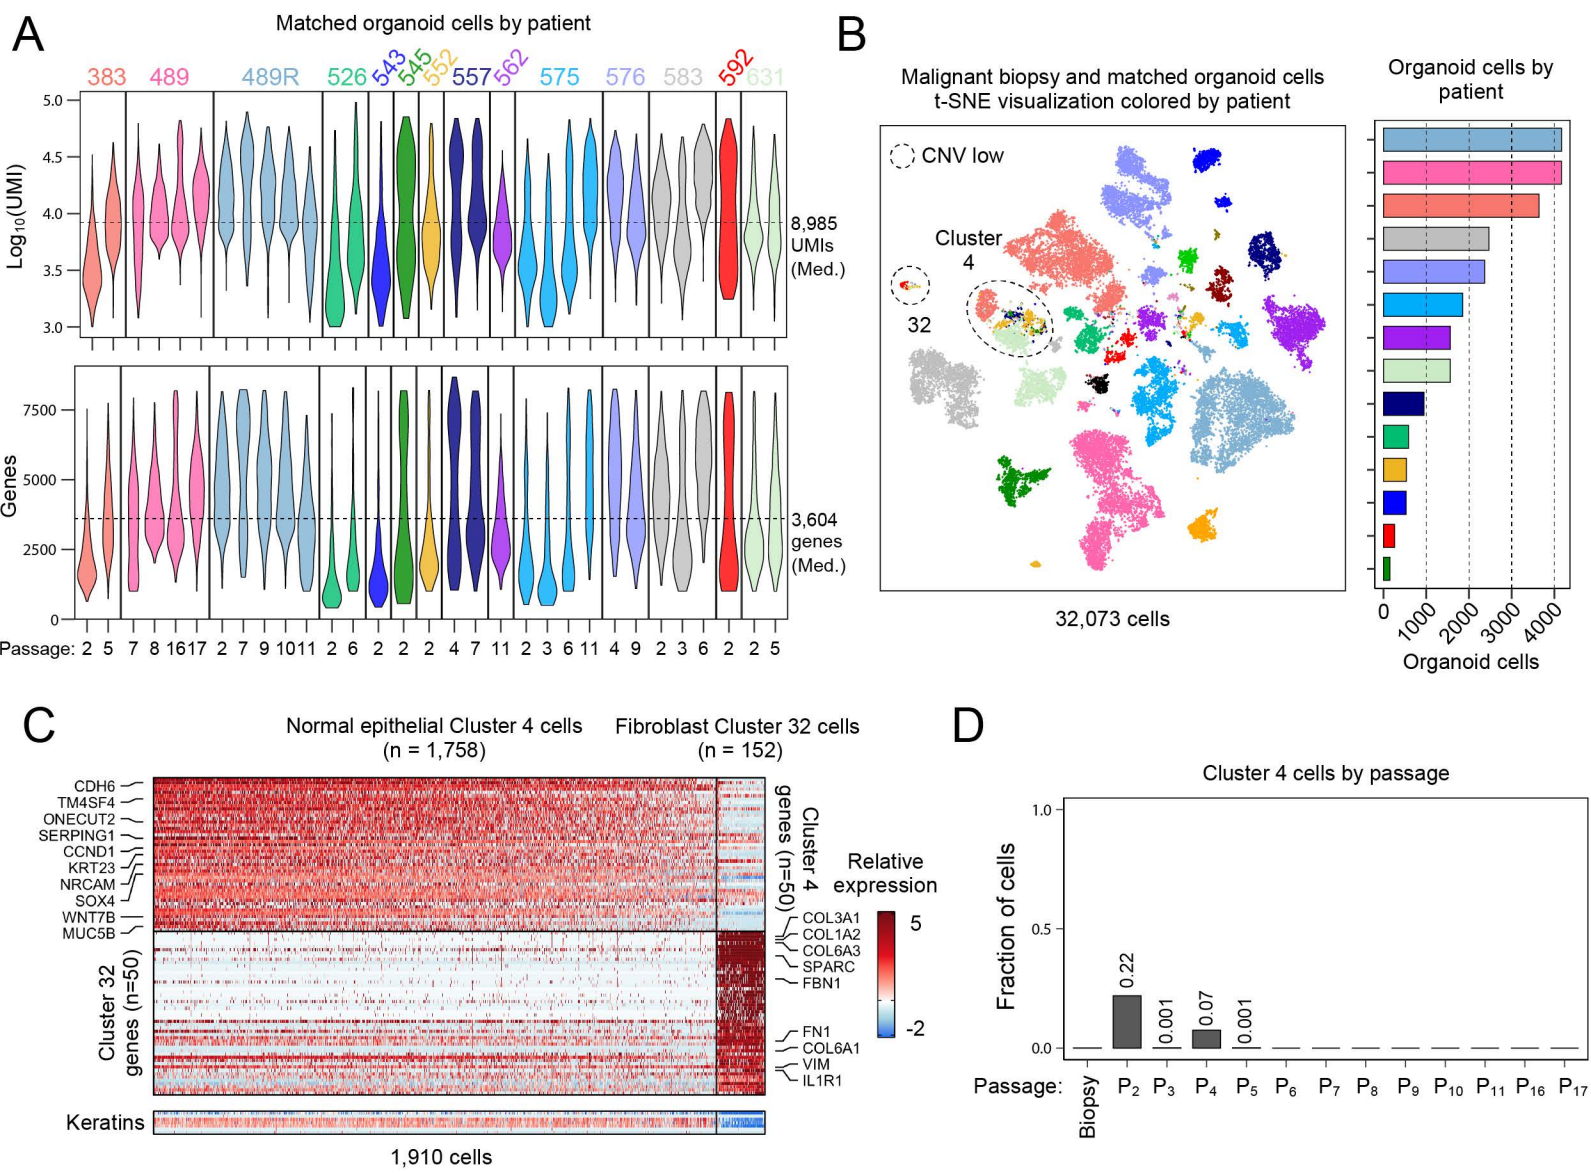



# Supplemental Figure S5 related to Figure 4

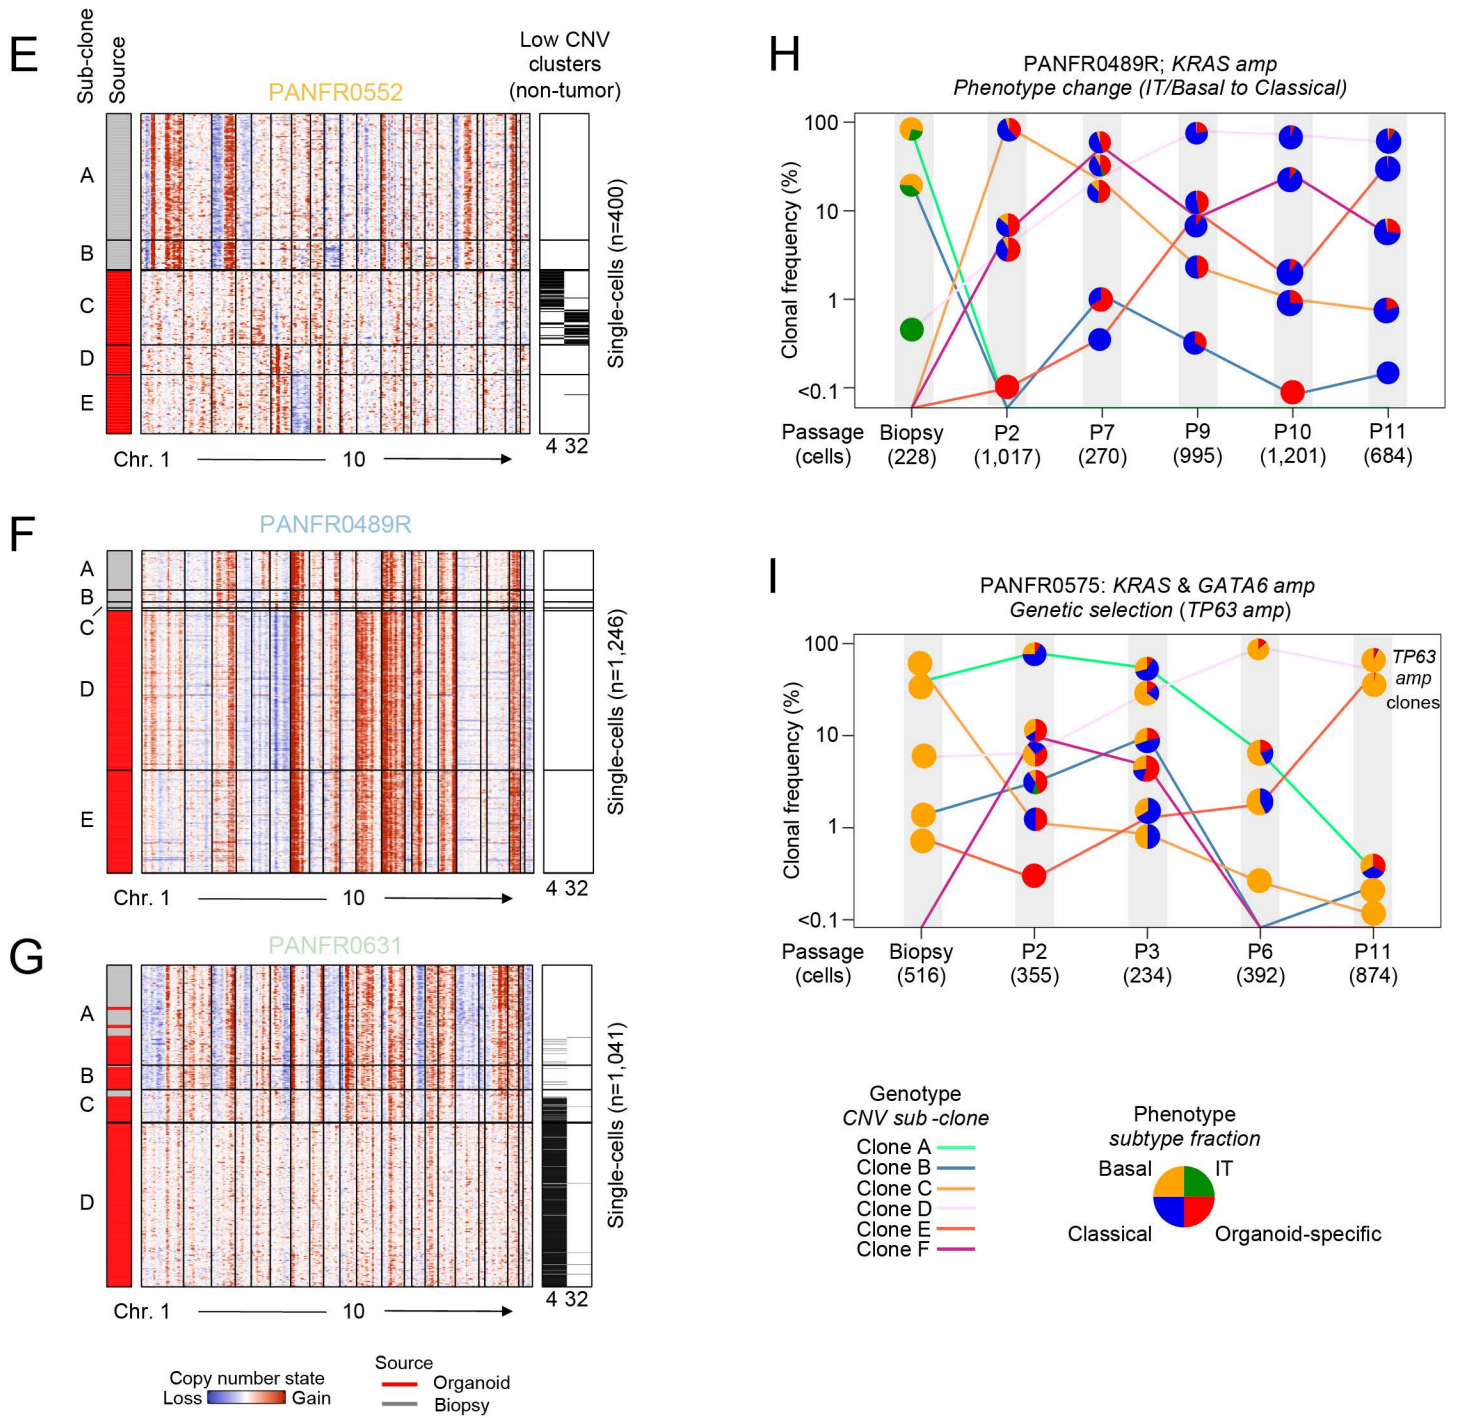



1370 **Supplemental Figure S5. Quality metrics, cell type identification, and serial sampling across the**  
1371 **patient-matched organoid cohort.**

1372 *Related to Figure 4*

1373 **A**, Distribution of unique molecules and genes captured in quality cells per organoid sample, median  
1374 values are indicated for each metric (dotted line) and violin plots are colored by patient ID (top,  
1375  $\text{Log}_{10}(\text{UMIs})$ ; bottom, number of genes).

1376 **B**, *t*-SNE visualization of all biopsy and matched organoid cells from iterative passages, colored by patient  
1377 ID. Dotted circles indicate the only two SNN clusters (4 and 32) with appreciably admixed clusters and  
1378 low CNV scores, the rest were patient-specific. Bar chart shows number of organoid cells recovered per  
1379 matched sample (right).

1380 **C**, Relative expression for genes defining cluster 4 (top) and cluster 32 (bottom; 1 versus rest DE with  
1381 the cells in **S5B**). Cluster 4 had an ambiguous epithelial identity while cluster 32 cells were defined by  
1382 canonical fibroblast genes and low to absent detection of CNVs.

1383 **D**, Fraction of cluster 4 cells at each passage. These cells did not survive iterative passaging suggesting  
1384 that they were either untransformed or unfit in organoid culture.

1385 **E-G**, Heatmaps show inferred CNV copy number status for every cell in each of three biopsy/early  
1386 passage organoid pairs. Cells are ordered by hierarchical clustering of their CNV profiles and letters on  
1387 the far left indicate subclones that have significant statistical evidence for tree-splitting (**Methods**). Each  
1388 cell's origin (biopsy tissue, grey; early passage organoid, red) is also noted ("Source" column). Right  
1389 metadata bars indicate if that cell came from an admixed SNN cluster (4 or 32 in **S5B**).

1390 **H, I**, Matched phenotype and genotype evolution at each passage in PANFR0489R (**S5H**) and  
1391 PANFR0575 (**S5I**). Frequencies of individual CNV clones at each time point (**Methods**, y axis) are tied  
1392 by colored lines. Fill represents the transcriptional phenotype fraction for each CNV clone. In sample  
1393 PANFR0575 (**S5I**), clones D and E had inferred *TP63* amplifications which expanded over time.

# Supplemental Figure S6, related to Figures 5 & 6

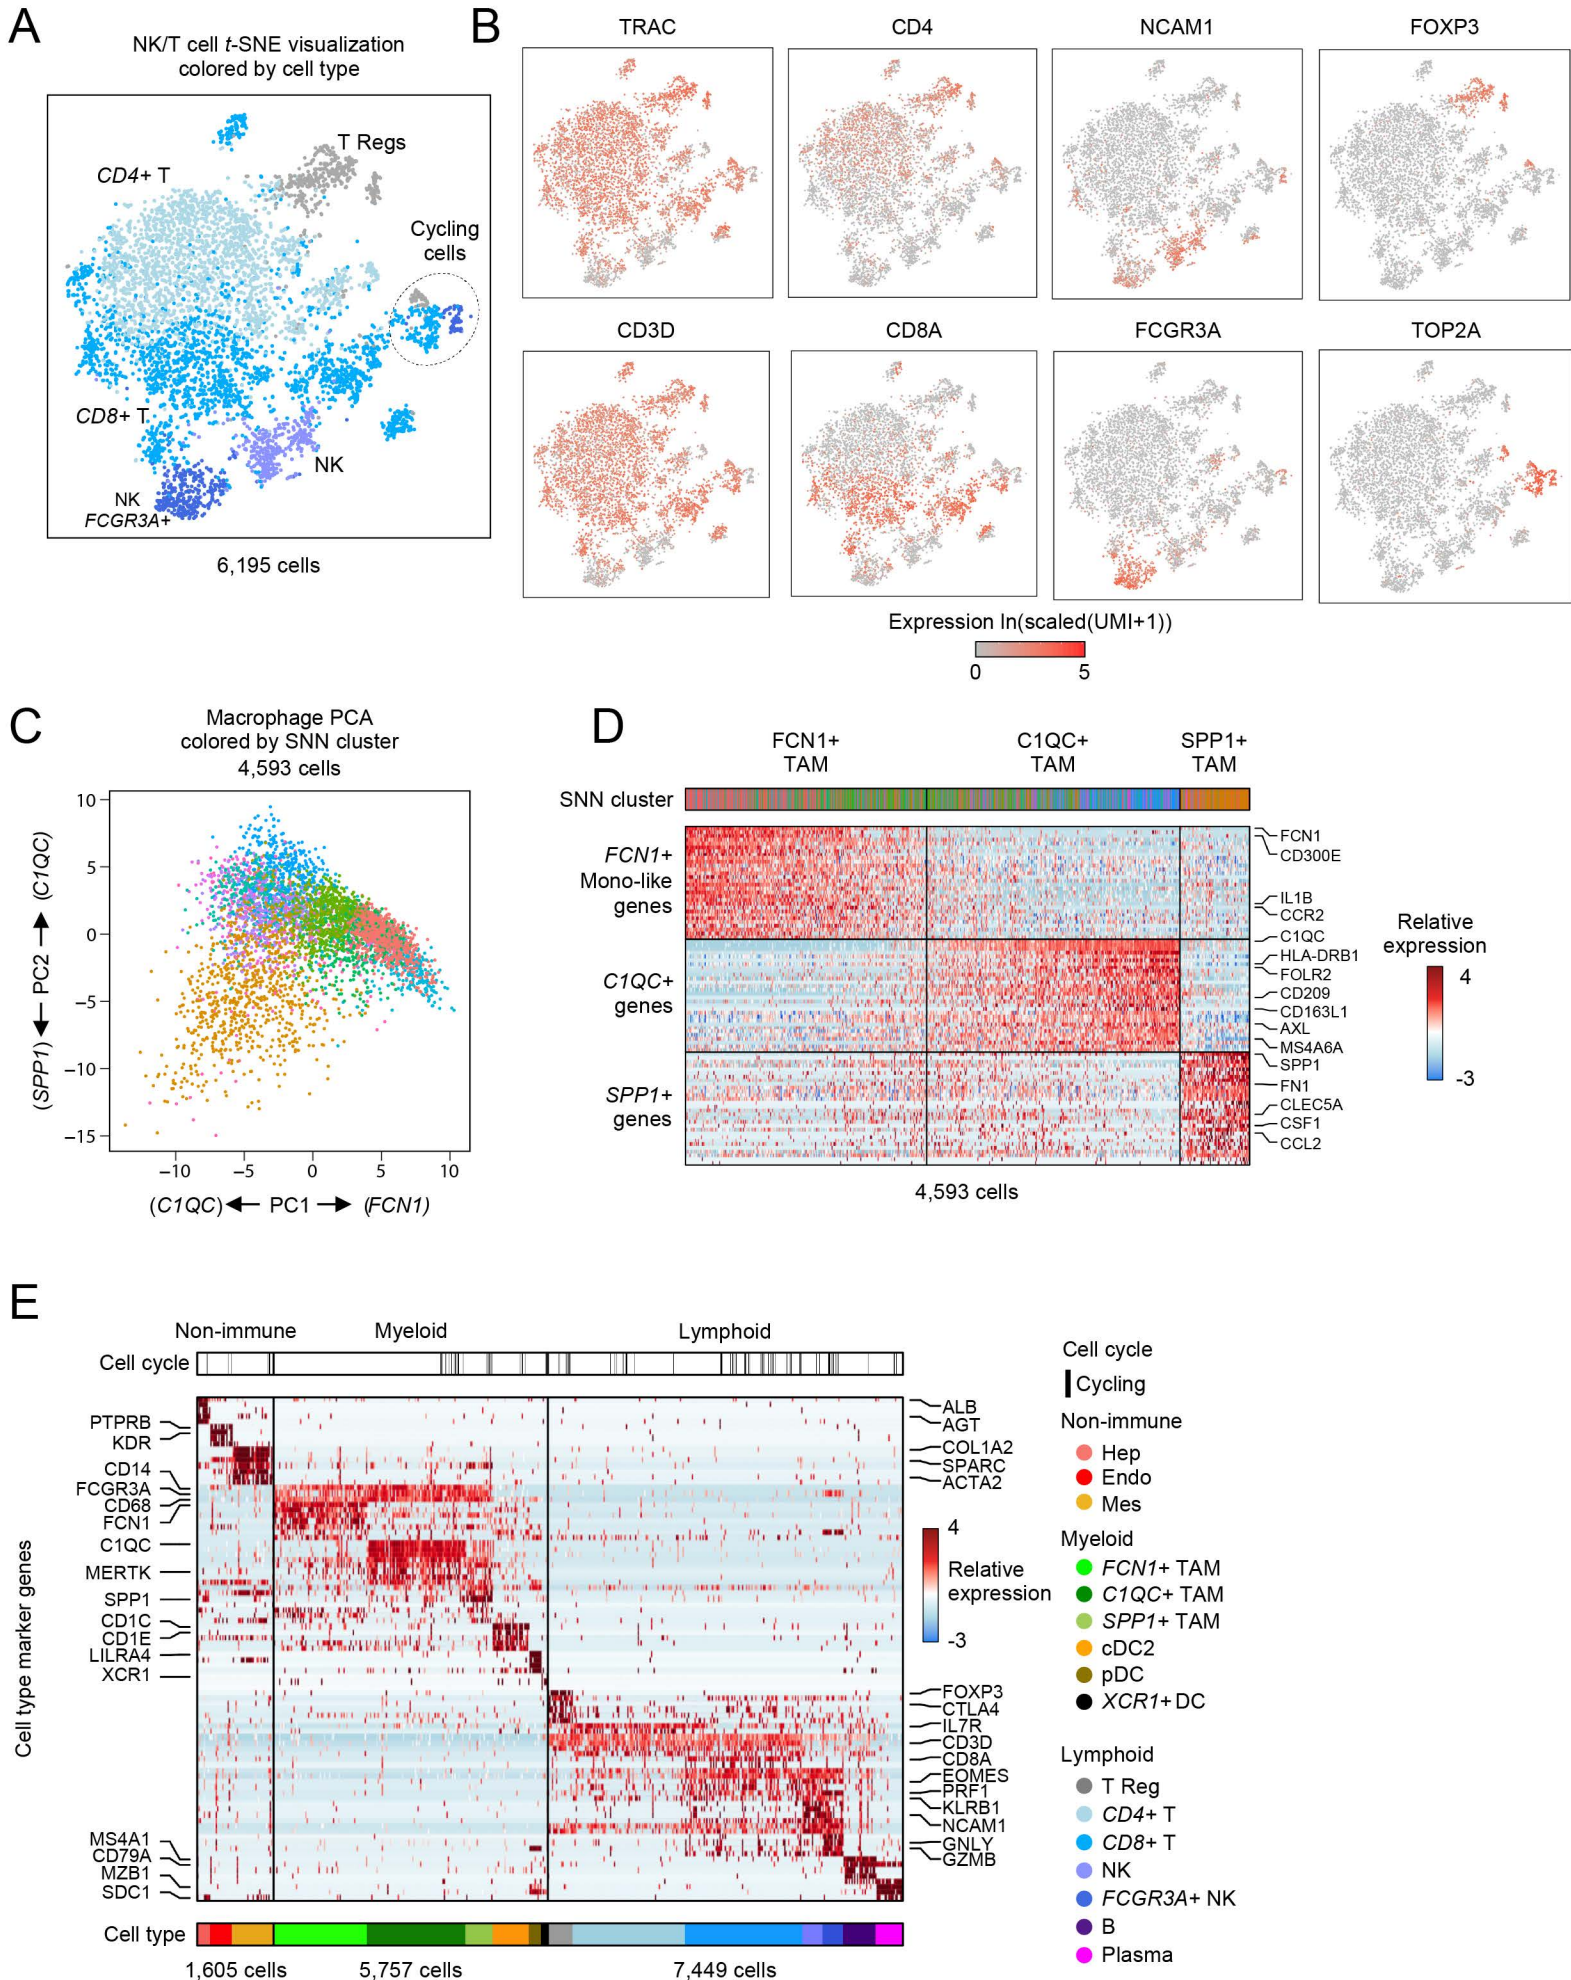

# Supplemental Figure S6, related to Figures 5 & 6

F

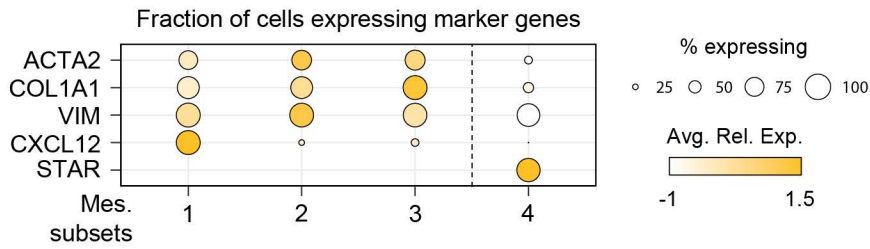

G

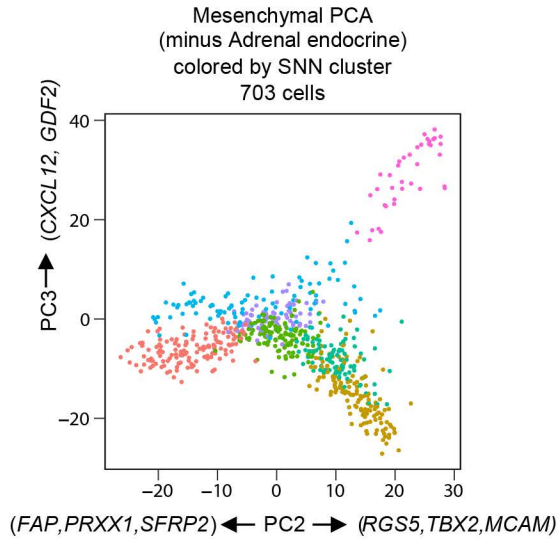

H

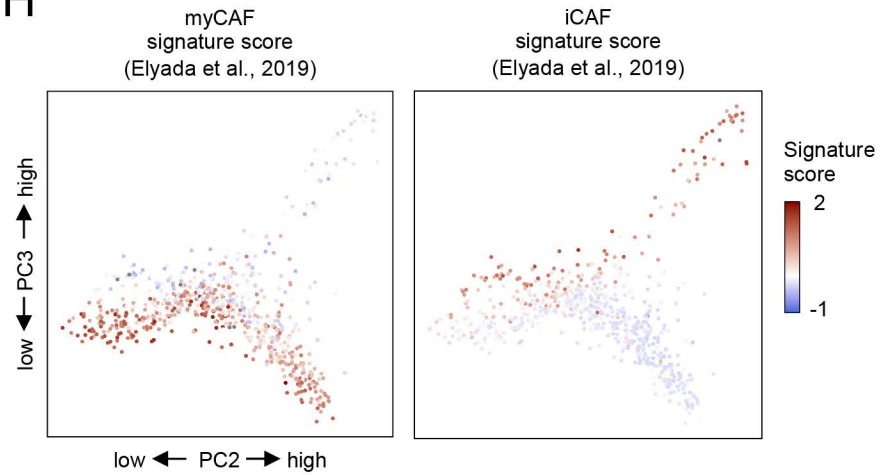

I

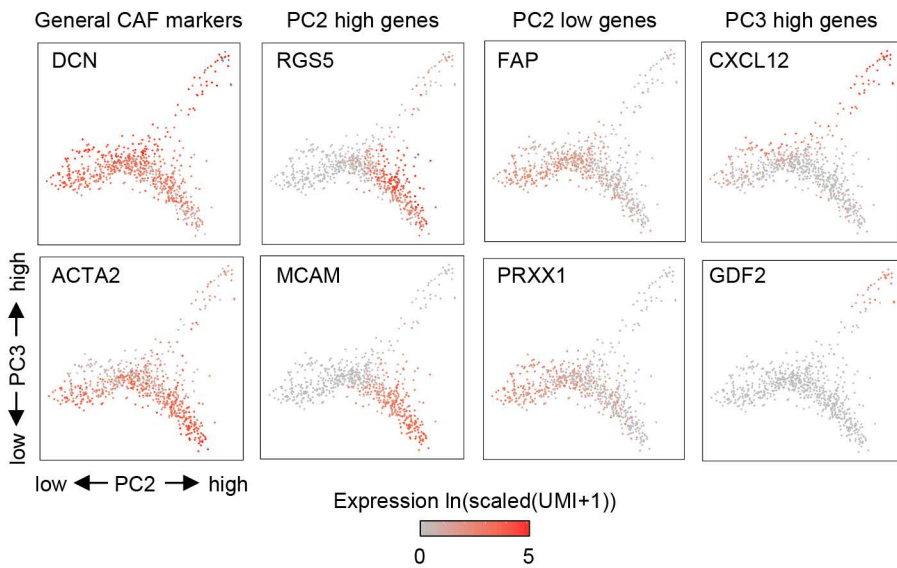

J

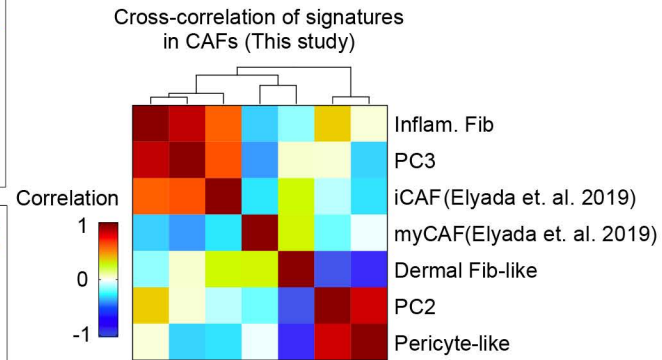

K

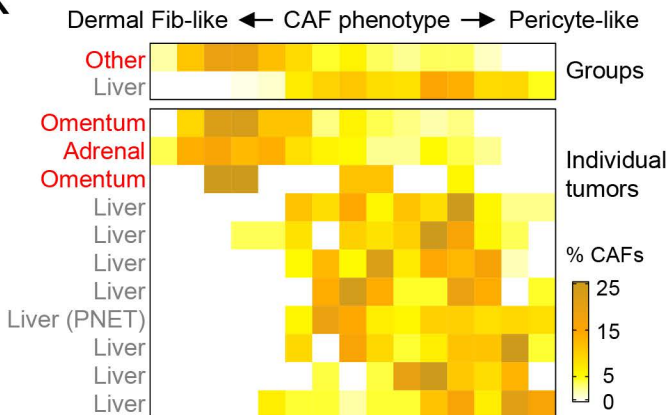



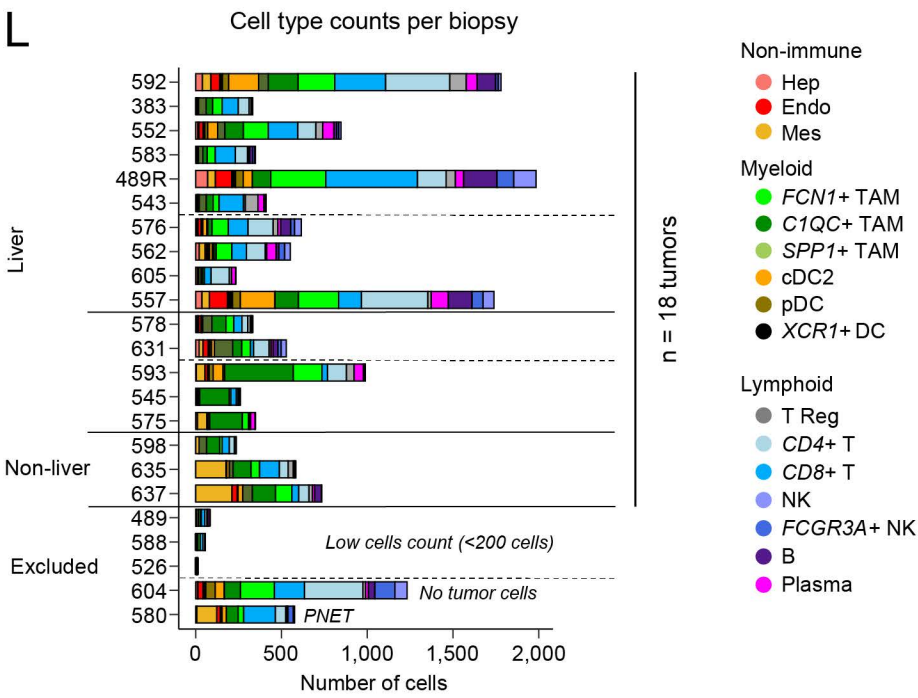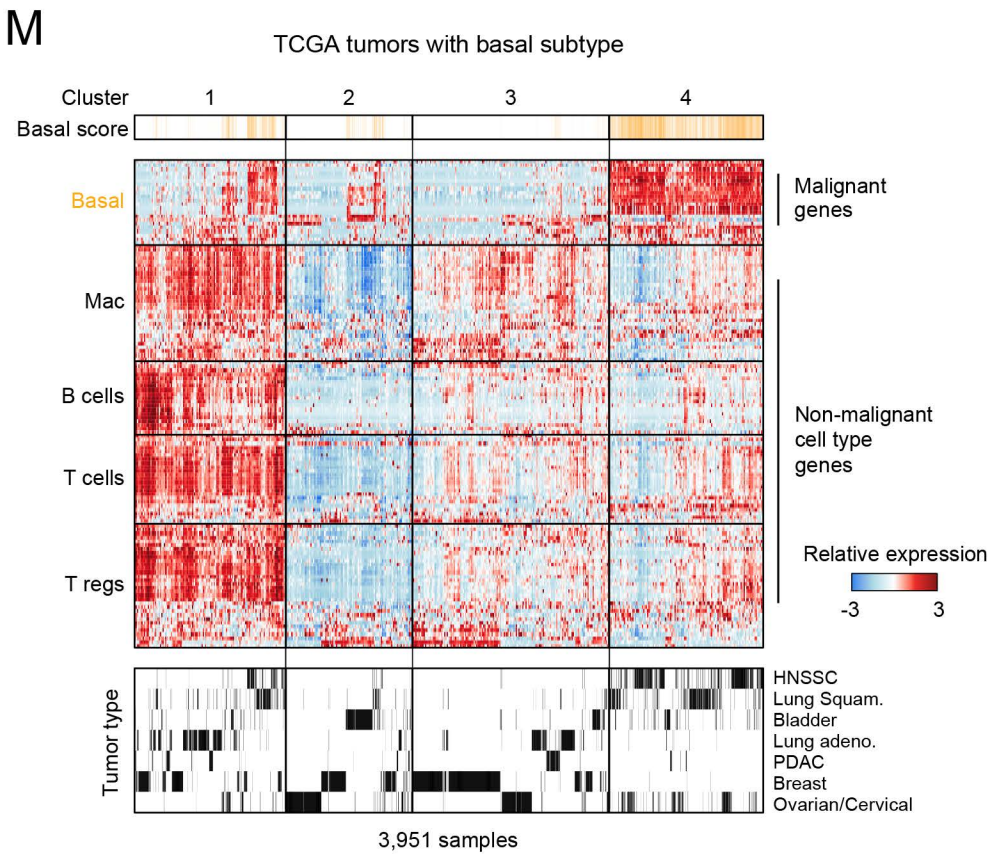

1394 **Supplemental Figure S6. Identification of T/NK, macrophage, and fibroblast heterogeneity in the**  
1395 **metastatic microenvironment.**

1396 *Related to Figures 5 & 6*

1397 **A**, *t*-SNE visualization of sub-clustering (SNN) performed on T/NK cells in the metastatic cohort. Cells  
1398 are colored by their type identity based on shared SNN cluster membership (Methods).

1399 **B**, Select cell type marker expression overlaid on the *t*-SNE visualization from **S6A**.

1400 **C**, PCA identifies 3 major subsets of TAMs in the metastatic niche. PC1 largely separates *FCN1*+  
1401 monocyte-like TAMs from more committed macrophage phenotypes. PC2 separates *SPP1*+ from *C1QC*+  
1402 macrophage phenotypes.

1403 **D**, Heatmap visualization of the gene expression programs specific to each TAM subset identified by the  
1404 PCA in **S6C (Methods)**. Top metadata indicate SNN cluster as in **S6C**.

1405 **E**, Heatmap shows the relative expression for select cell type markers. Top bar indicates the binarized  
1406 cell cycle program (black, cycling) and the bottom color bar corresponds to the cell type colors noted in  
1407 **Figure 6A**.

1408 **F**, Dot plots for average expression of the indicated CAF and adrenal endocrine marker genes in each of  
1409 the cell subsets (1-4) identified in **Figure 5C**. Size of the dot indicates fraction of cells expressing a given  
1410 gene.

1411 **G**, PCA over fibroblasts in the cohort (excluding Adrenal endocrine cells; subset 4, **Figure 5C**). Scatter  
1412 plot of PC2 vs PC3 defines 3 states for CAFs in our cohort (**Methods**).

1413 **H**, Same visualization in **S6B**, but cells are colored by previously identified myCaf or iCaf signature  
1414 scores. myCaf is evenly distributed across PC2 and iCaf associates with higher PC3 scores.

1415 **I**, Expression for select markers overlaid on the PCA from **S6B**.

1416 **J**, Cross-correlation of fibroblast signatures in single-cells. New dermal- vs. pericyte-like signatures  
1417 provide non-overlapping information. PC3 inflammatory phenotypes are similar to the previously reported  
1418 iCaf phenotype (Elyada et al., 2019) and our PC3-derived inflammatory fibroblast signature.

1419 **K**, Distribution across the CAF continuum comparing site differences as groups (top) or individual tumors  
1420 (bottom). Heat indicates the fraction of CAFs in that score bin.

1421 **L**, Bar plot shows the number of non-malignant cells in each biopsy, color fill indicates the number of  
1422 each cell type captured in that sample. Five biopsies were excluded from the analysis in **Figure 6A-C**  
1423 because they either had low cell capture or were from a tumor with indeterminate malignant  
1424 transcriptional subtype. Relevant samples are organized as in **Figure 6A**.

1425 **M**, Cross TCGA analysis for basal and immune cell type markers in epithelial tumors with known basal  
1426 subtypes (Cancer Genome Atlas Research et al., 2013). Tumors with strong basal gene expression do



1427 not associate with strong immune infiltrates. Clusters were determined by dendrogram splitting and  
1428 disease type for each sample is indicated below.

# Supplemental Figure S7 related to Figure 7

**A**

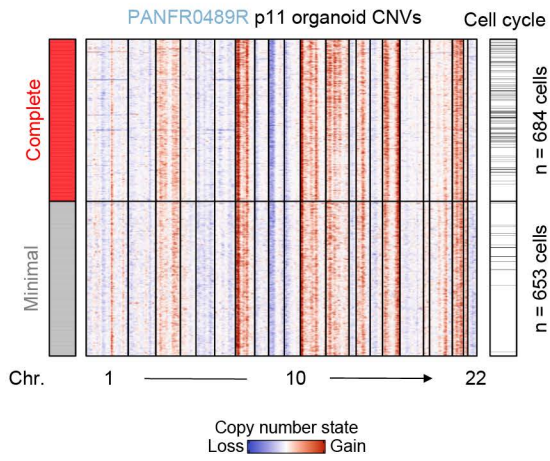

**B**

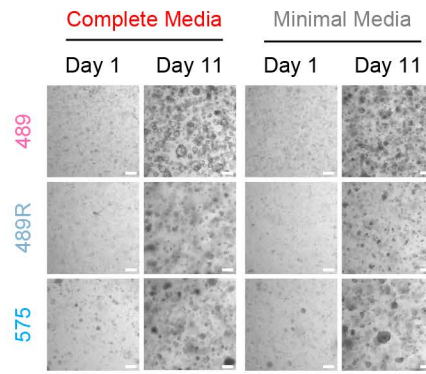

**C**

Day 6

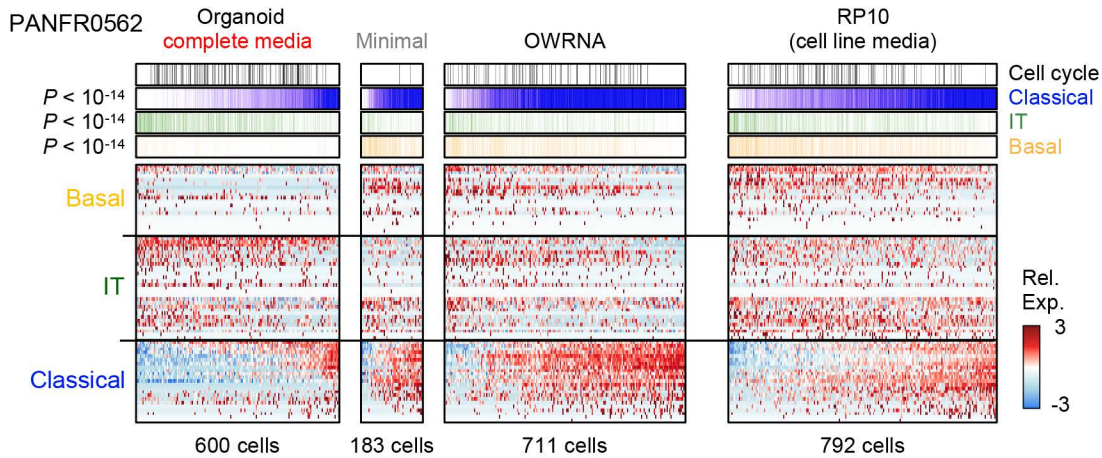

# Supplemental Figure S7, related to Figure 7

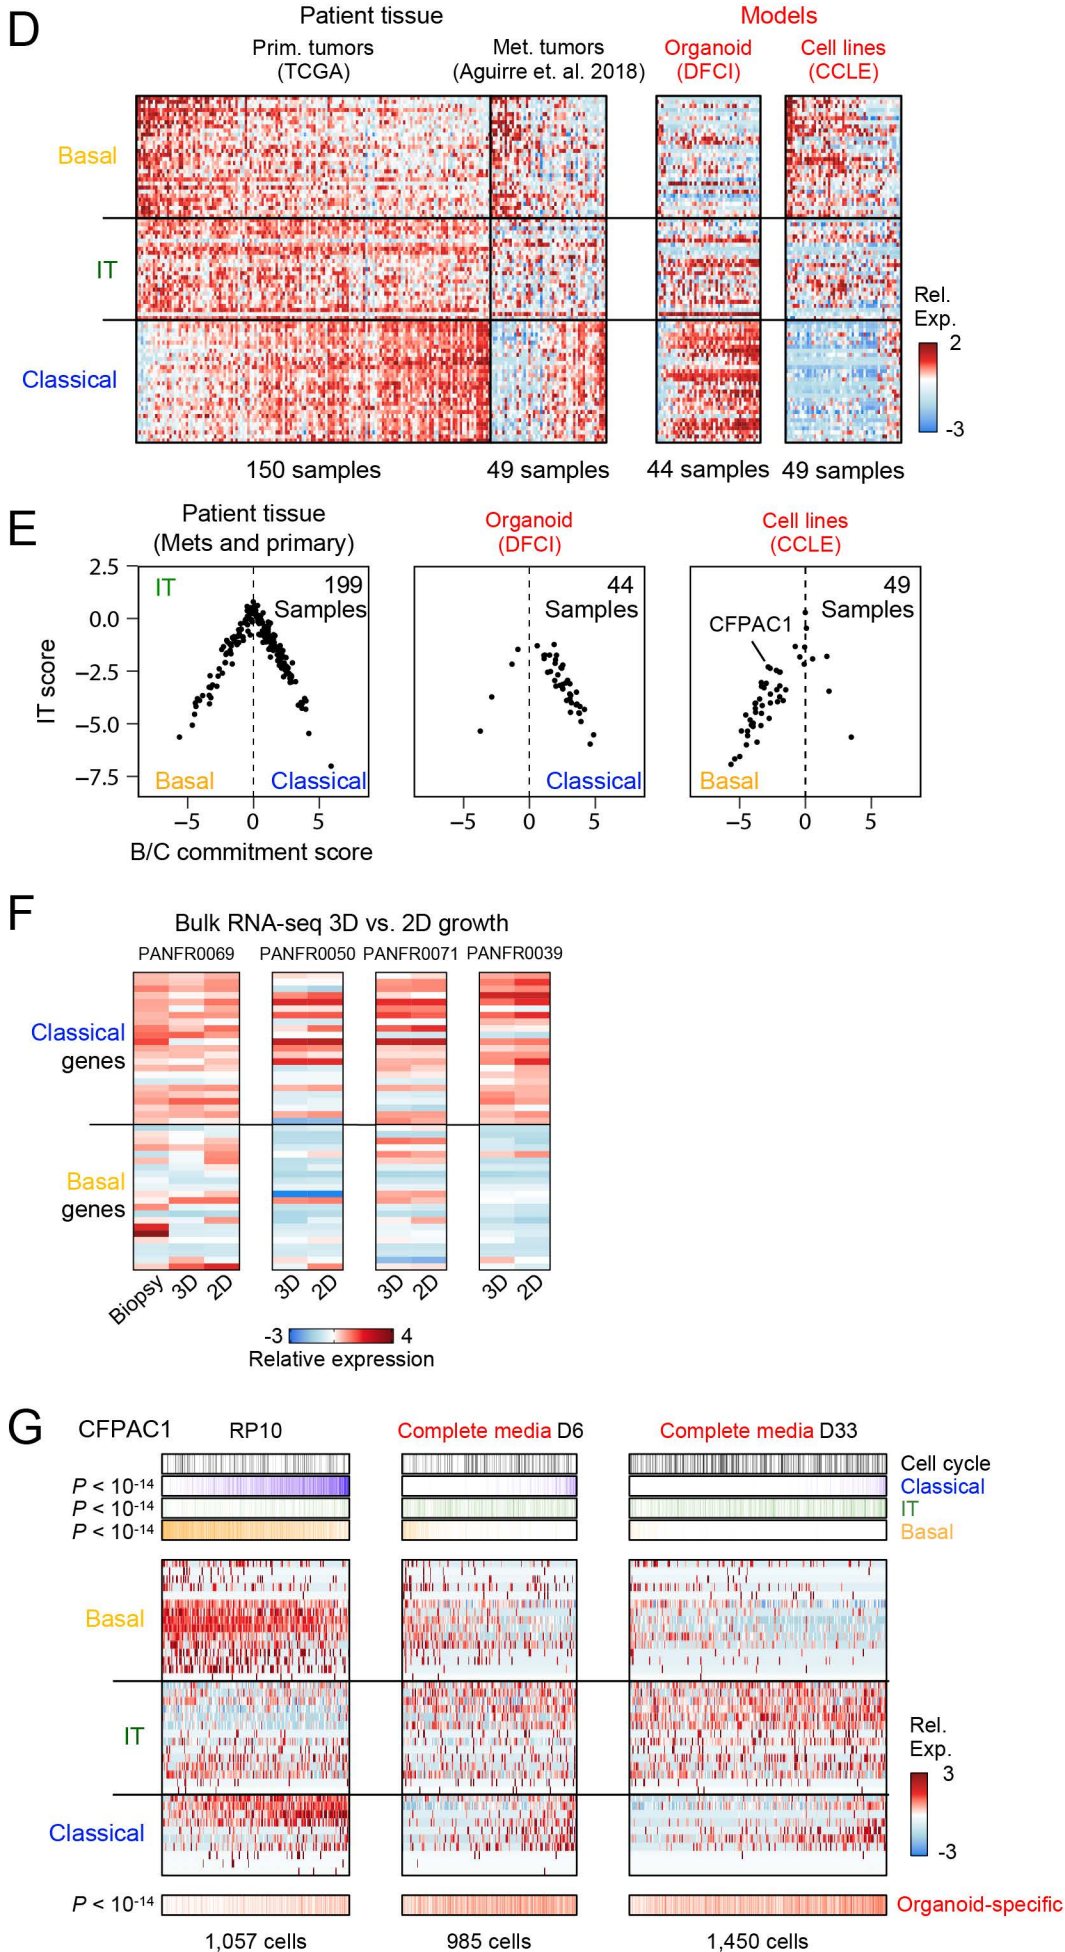

1429 **Supplemental Figure S7. Alterations to organoid media, but not matrix dimensionality, shift**  
1430 **transcriptional phenotype.**

1431 *Related to Figure 7*

1432 **A**, Inferred CNVs for each cell from the PANFR489R samples cultured in either Minimal (grey) or  
1433 Complete (red) organoid media conditions in **Figure 7B**.

1434 **B**, Brightfield images were obtained for organoids grown in standard organoid media (“Complete”) or in  
1435 media without any growth factors (“Minimal”) at days 1 and 11 after seeding.

1436 **C**, Single organoid cells from model PANFR0562 (columns) cultured for 6 days in Complete medium,  
1437 Minimal medium, OWRNA medium, or in RP10 (“cell line” medium, RPMI-1640 with 10% fetal bovine  
1438 serum) and scored for basal, IT, and classical hierarchy phenotypes (rows). *P*-values for group  
1439 differences were calculated by ANOVA followed by Tukey’s HSD.

1440 **D**, Relative expression for 90 genes representing PDAC state programs across bulk RNA-seq samples  
1441 from primary resections (TCGA) and metastatic biopsies (Panc-Seq), as well as organoid and cell line  
1442 (CCLE) models (Aguirre et al., 2018; Barretina et al., 2012; Cancer Genome Atlas Research Network,  
1443 2017; Ghandi et al., 2019).

1444 **E**, PDAC malignant state diagrams for average Basal-classical commitment score (*x* axis) and IT score  
1445 (*y* axis) for bulk RNA-seq samples in **S7D**.

1446 **F**, Four established models were adapted to 2-dimensional culture in complete organoid media and  
1447 measured via bulk RNA-seq. Rows indicate expression levels of basal-classical commitment score  
1448 genes.

1449 **G**, Single cells from the established PDAC cell line CFPAC1 (columns) sampled in RP10 (standard “cell  
1450 line” medium, RPMI-1640 with 10% fetal bovine serum) or at 2 timepoints in Complete organoid medium  
1451 and scored for basal, IT, and classical phenotypes (rows). Bottom row indicates single cell organoid-  
1452 specific gene expression (as described in **Figure 4B**) across all three conditions. *P*-values for group  
1453 differences were calculated by ANOVA followed by Tukey’s HSD.

1454

## 1455 REFERENCES

1456

1457 Abo, R.P., Ducar, M., Garcia, E.P., Thorner, A.R., Rojas-Rudilla, V., Lin, L., Sholl, L.M., Hahn, W.C.,  
1458 Meyerson, M., Lindeman, N.I., *et al.* (2015). BreaKmer: detection of structural variation in targeted  
1459 massively parallel sequencing data using kmers. *Nucleic Acids Res* 43, e19.

1460 Aguirre, A.J., Nowak, J.A., Camarda, N.D., Moffitt, R.A., Ghazani, A.A., Hazar-Rethinam, M., Raghavan,  
1461 S., Kim, J., Brais, L.K., Ragon, D., *et al.* (2018). Real-time Genomic Characterization of Advanced  
1462 Pancreatic Cancer to Enable Precision Medicine. *Cancer Discov* 8, 1096-1111.

1463 Alonso-Curbelo, D., Ho, Y.J., Burdziak, C., Maag, J.L.V., Morris, J.P.t., Chandwani, R., Chen, H.A.,  
1464 Tsanov, K.M., Barriga, F.M., Luan, W., *et al.* (2021). A gene-environment-induced epigenetic program  
1465 initiates tumorigenesis. *Nature* 590, 642-648.

1466 Ascension, A.M., Fuertes-Alvarez, S., Ibanez-Sole, O., Izeta, A., and Arauzo-Bravo, M.J. (2020). Human  
1467 Dermal Fibroblast Subpopulations Are Conserved across Single-Cell RNA Sequencing Studies. *J Invest*  
1468 *Dermatol*.

1469 Aung, K.L., Fischer, S.E., Denroche, R.E., Jang, G.H., Dodd, A., Creighton, S., Southwood, B., Liang,  
1470 S.B., Chadwick, D., Zhang, A., *et al.* (2018). Genomics-Driven Precision Medicine for Advanced  
1471 Pancreatic Cancer: Early Results from the COMPASS Trial. *Clin Cancer Res* 24, 1344-1354.

1472 Bailey, P., Chang, D.K., Nones, K., Johns, A.L., Patch, A.M., Gingras, M.C., Miller, D.K., Christ, A.N.,  
1473 Bruxner, T.J., Quinn, M.C., *et al.* (2016). Genomic analyses identify molecular subtypes of pancreatic  
1474 cancer. *Nature* 531, 47-52.

1475 Balachandran, V.P., Beatty, G.L., and Dougan, S.K. (2019). Broadening the Impact of Immunotherapy to  
1476 Pancreatic Cancer: Challenges and Opportunities. *Gastroenterology* 156, 2056-2072.

1477 Barretina, J., Caponigro, G., Stransky, N., Venkatesan, K., Margolin, A.A., Kim, S., Wilson, C.J., Lehar,  
1478 J., Kryukov, G.V., Sonkin, D., *et al.* (2012). The Cancer Cell Line Encyclopedia enables predictive  
1479 modelling of anticancer drug sensitivity. *Nature* 483, 603-607.

1480 Bartoschek, M., Oskolkov, N., Bocci, M., Lovrot, J., Larsson, C., Sommarin, M., Madsen, C.D., Lindgren,  
1481 D., Pekar, G., Karlsson, G., *et al.* (2018). Spatially and functionally distinct subclasses of breast cancer-  
1482 associated fibroblasts revealed by single cell RNA sequencing. *Nat Commun* 9, 5150.

1483 Ben-David, U., Beroukhim, R., and Golub, T.R. (2019). Genomic evolution of cancer models: perils and  
1484 opportunities. *Nat Rev Cancer* 19, 97-109.

1485 Ben-David, U., Ha, G., Tseng, Y.Y., Greenwald, N.F., Oh, C., Shih, J., McFarland, J.M., Wong, B.,  
1486 Boehm, J.S., Beroukhim, R., *et al.* (2017). Patient-derived xenografts undergo mouse-specific tumor  
1487 evolution. *Nat Genet* 49, 1567-1575.

1488 Ben-David, U., Siranosian, B., Ha, G., Tang, H., Oren, Y., Hinohara, K., Strathdee, C.A., Dempster, J.,  
1489 Lyons, N.J., Burns, R., *et al.* (2018). Genetic and transcriptional evolution alters cancer cell line drug  
1490 response. *Nature* 560, 325-330.

1491 Benci, J.L., Xu, B., Qiu, Y., Wu, T.J., Dada, H., Twyman-Saint Victor, C., Cucolo, L., Lee, D.S.M., Pauken,  
1492 K.E., Huang, A.C., *et al.* (2016). Tumor Interferon Signaling Regulates a Multigenic Resistance Program  
1493 to Immune Checkpoint Blockade. *Cell* 167, 1540-1554 e1512.

1494 Bernard, V., Semaan, A., Huang, J., San Lucas, F.A., Mulu, F.C., Stephens, B.M., Guerrero, P.A., Huang,  
1495 Y., Zhao, J., Kamyabi, N., *et al.* (2019). Single-Cell Transcriptomics of Pancreatic Cancer Precursors



- 1496 Demonstrates Epithelial and Microenvironmental Heterogeneity as an Early Event in Neoplastic  
1497 Progression. *Clin Cancer Res* 25, 2194-2205.
- 1498 Bi, W.L., Greenwald, N.F., Ramkissoon, S.H., Abedalthagafi, M., Coy, S.M., Ligon, K.L., Mei, Y.,  
1499 MacConaill, L., Ducar, M., Min, L., *et al.* (2017). Clinical Identification of Oncogenic Drivers and Copy-  
1500 Number Alterations in Pituitary Tumors. *Endocrinology* 158, 2284-2291.
- 1501 Biffi, G., Oni, T.E., Spielman, B., Hao, Y., Elyada, E., Park, Y., Preall, J., and Tuveson, D.A. (2019). IL1-  
1502 Induced JAK/STAT Signaling Is Antagonized by TGFbeta to Shape CAF Heterogeneity in Pancreatic  
1503 Ductal Adenocarcinoma. *Cancer Discov* 9, 282-301.
- 1504 Boj, S.F., Hwang, C.I., Baker, L.A., Chio, II, Engle, D.D., Corbo, V., Jager, M., Ponz-Sarvise, M., Tiriach,  
1505 H., Spector, M.S., *et al.* (2015). Organoid models of human and mouse ductal pancreatic cancer. *Cell*  
1506 160, 324-338.
- 1507 Cancer Genome Atlas Research, N., Weinstein, J.N., Collisson, E.A., Mills, G.B., Shaw, K.R.,  
1508 Ozenberger, B.A., Ellrott, K., Shmulevich, I., Sander, C., and Stuart, J.M. (2013). The Cancer Genome  
1509 Atlas Pan-Cancer analysis project. *Nat Genet* 45, 1113-1120.
- 1510 Cancer Genome Atlas Research Network (2017). Integrated Genomic Characterization of Pancreatic  
1511 Ductal Adenocarcinoma. *Cancer Cell* 32, 185-203 e113.
- 1512 Chan-Seng-Yue, M., Kim, J.C., Wilson, G.W., Ng, K., Figueroa, E.F., O'Kane, G.M., Connor, A.A.,  
1513 Denroche, R.E., Grant, R.C., McLeod, J., *et al.* (2020). Transcription phenotypes of pancreatic cancer  
1514 are driven by genomic events during tumor evolution. *Nat Genet* 52, 231-240.
- 1515 Collisson, E.A., Sadanandam, A., Olson, P., Gibb, W.J., Truitt, M., Gu, S., Cooc, J., Weinkle, J., Kim,  
1516 G.E., Jakkula, L., *et al.* (2011). Subtypes of pancreatic ductal adenocarcinoma and their differing  
1517 responses to therapy. *Nat Med* 17, 500-503.
- 1518 Connor, A.A., Denroche, R.E., Jang, G.H., Lemire, M., Zhang, A., Chan-Seng-Yue, M., Wilson, G., Grant,  
1519 R.C., Merico, D., Lungu, I., *et al.* (2019). Integration of Genomic and Transcriptional Features in  
1520 Pancreatic Cancer Reveals Increased Cell Cycle Progression in Metastases. *Cancer Cell* 35, 267-282  
1521 e267.
- 1522 Di Carlo, S.E., and Peduto, L. (2018). The perivascular origin of pathological fibroblasts. *J Clin Invest*  
1523 128, 54-63.
- 1524 Elyada, E., Bolisetty, M., Laise, P., Flynn, W.F., Courtois, E.T., Burkhart, R.A., Teinor, J.A., Belleau, P.,  
1525 Biffi, G., Lucito, M.S., *et al.* (2019). Cross-Species Single-Cell Analysis of Pancreatic Ductal  
1526 Adenocarcinoma Reveals Antigen-Presenting Cancer-Associated Fibroblasts. *Cancer Discov* 9, 1102-  
1527 1123.
- 1528 Fabre, M., Ferrer, C., Dominguez-Hormaetxe, S., Bockorny, B., Murias, L., Seifert, O., Eisler, S.A.,  
1529 Kontermann, R.E., Pfizenmaier, K., Lee, S.Y., *et al.* (2020). OMTX705, a Novel FAP-Targeting ADC  
1530 Demonstrates Activity in Chemotherapy and Pembrolizumab-Resistant Solid Tumor Models. *Clin Cancer*  
1531 *Res* 26, 3420-3430.
- 1532 Fan, J., Lee, H.O., Lee, S., Ryu, D.E., Lee, S., Xue, C., Kim, S.J., Kim, K., Barkas, N., Park, P.J., *et al.*  
1533 (2018). Linking transcriptional and genetic tumor heterogeneity through allele analysis of single-cell RNA-  
1534 seq data. *Genome Res* 28, 1217-1227.
- 1535 Filbin, M.G., Tirosh, I., Hovestadt, V., Shaw, M.L., Escalante, L.E., Mathewson, N.D., Neftel, C., Frank,  
1536 N., Pelton, K., Hebert, C.M., *et al.* (2018). Developmental and oncogenic programs in H3K27M gliomas  
1537 dissected by single-cell RNA-seq. *Science* 360, 331-335.

- 1538 Garcia, E.P., Minkovsky, A., Jia, Y., Ducar, M.D., Shivdasani, P., Gong, X., Ligon, A.H., Sholl, L.M., Kuo,  
1539 F.C., MacConaill, L.E., *et al.* (2017). Validation of OncoPanel: A Targeted Next-Generation Sequencing  
1540 Assay for the Detection of Somatic Variants in Cancer. *Arch Pathol Lab Med* 141, 751-758.
- 1541 Ghandi, M., Huang, F.W., Jane-Valbuena, J., Kryukov, G.V., Lo, C.C., McDonald, E.R., 3rd, Barretina,  
1542 J., Gelfand, E.T., Bielski, C.M., Li, H., *et al.* (2019). Next-generation characterization of the Cancer Cell  
1543 Line Encyclopedia. *Nature* 569, 503-508.
- 1544 Gierahn, T.M., Wadsworth, M.H., 2nd, Hughes, T.K., Bryson, B.D., Butler, A., Satija, R., Fortune, S.,  
1545 Love, J.C., and Shalek, A.K. (2017). Seq-Well: portable, low-cost RNA sequencing of single cells at high  
1546 throughput. *Nat Methods* 14, 395-398.
- 1547 Groger, C.J., Grubinger, M., Waldhor, T., Vierlinger, K., and Mikulits, W. (2012). Meta-analysis of gene  
1548 expression signatures defining the epithelial to mesenchymal transition during cancer progression. *PLoS*  
1549 *One* 7, e51136.
- 1550 Hayashi, A., Fan, J., Chen, R., Ho, Y.-j., Makohon-Moore, A.P., Lecomte, N., Zhong, Y., Hong, J., Huang,  
1551 J., Sakamoto, H., *et al.* (2020). A unifying paradigm for transcriptional heterogeneity and squamous  
1552 features in pancreatic ductal adenocarcinoma. *Nature Cancer* 1, 59-74.
- 1553 Ho, W.J., Jaffee, E.M., and Zheng, L. (2020). The tumour microenvironment in pancreatic cancer - clinical  
1554 challenges and opportunities. *Nat Rev Clin Oncol* 17, 527-540.
- 1555 Hosaka, K., Yang, Y., Seki, T., Fischer, C., Dubey, O., Fredlund, E., Hartman, J., Religa, P., Morikawa,  
1556 H., Ishii, Y., *et al.* (2016). Pericyte-fibroblast transition promotes tumor growth and metastasis. *Proc Natl*  
1557 *Acad Sci U S A* 113, E5618-5627.
- 1558 Hovestadt, V., Smith, K.S., Bihannic, L., Filbin, M.G., Shaw, M.L., Baumgartner, A., DeWitt, J.C., Groves,  
1559 A., Mayr, L., Weisman, H.R., *et al.* (2019). Resolving medulloblastoma cellular architecture by single-cell  
1560 genomics. *Nature* 572, 74-79.
- 1561 Hughes, T.K., Wadsworth, M.H., 2nd, Gierahn, T.M., Do, T., Weiss, D., Andrade, P.R., Ma, F., de  
1562 Andrade Silva, B.J., Shao, S., Tsoi, L.C., *et al.* (2020). Second-Strand Synthesis-Based Massively  
1563 Parallel scRNA-Seq Reveals Cellular States and Molecular Features of Human Inflammatory Skin  
1564 Pathologies. *Immunity* 53, 878-894 e877.
- 1565 Hyman, D.M., Taylor, B.S., and Baselga, J. (2017). Implementing Genome-Driven Oncology. *Cell* 168,  
1566 584-599.
- 1567 Kim, C., Gao, R., Sei, E., Brandt, R., Hartman, J., Hatschek, T., Crosetto, N., Foukakis, T., and Navin,  
1568 N.E. (2018). Chemoresistance Evolution in Triple-Negative Breast Cancer Delineated by Single-Cell  
1569 Sequencing. *Cell* 173, 879-893 e813.
- 1570 Kim, J.H., Park, S.Y., Jun, Y., Kim, J.Y., and Nam, J.S. (2017). Roles of Wnt Target Genes in the Journey  
1571 of Cancer Stem Cells. *Int J Mol Sci* 18.
- 1572 Li, J., Byrne, K.T., Yan, F., Yamazoe, T., Chen, Z., Baslan, T., Richman, L.P., Lin, J.H., Sun, Y.H., Rech,  
1573 A.J., *et al.* (2018). Tumor Cell-Intrinsic Factors Underlie Heterogeneity of Immune Cell Infiltration and  
1574 Response to Immunotherapy. *Immunity* 49, 178-193 e177.
- 1575 Li, Y., He, Y., Peng, J., Su, Z., Li, Z., Zhang, B., Ma, J., Zhuo, M., Zou, D., Liu, X., *et al.* (2021). Mutant  
1576 Kras co-opts a proto-oncogenic enhancer network in inflammation-induced metaplastic progenitor cells  
1577 to initiate pancreatic cancer. *Nature Cancer* 2, 49-65.
- 1578 Ligorio, M., Sil, S., Malagon-Lopez, J., Nieman, L.T., Misale, S., Di Pilato, M., Ebricht, R.Y., Karabacak,  
1579 M.N., Kulkarni, A.S., Liu, A., *et al.* (2019). Stromal Microenvironment Shapes the Intratumoral  
1580 Architecture of Pancreatic Cancer. *Cell* 178, 160-175 e127.

- 1581 Macosko, E.Z., Basu, A., Satija, R., Nemesh, J., Shekhar, K., Goldman, M., Tirosh, I., Bialas, A.R.,  
1582 Kamitaki, N., Martersteck, E.M., *et al.* (2015). Highly Parallel Genome-wide Expression Profiling of  
1583 Individual Cells Using Nanoliter Droplets. *Cell* *161*, 1202-1214.
- 1584 Miyabayashi, K., Baker, L.A., Deschênes, A., Traub, B., Caligiuri, G., Plenker, D., Alagesan, B., Belleau,  
1585 P., Li, S., Kendall, J., *et al.* (2020). Intraductal Transplantation Models of Human Pancreatic Ductal  
1586 Adenocarcinoma Reveal Progressive Transition of Molecular Subtypes. *Cancer Discovery* *10*, 1566-  
1587 1589.
- 1588 Moffitt, R.A., Marayati, R., Flate, E.L., Volmar, K.E., Loeza, S.G., Hoadley, K.A., Rashid, N.U., Williams,  
1589 L.A., Eaton, S.C., Chung, A.H., *et al.* (2015). Virtual microdissection identifies distinct tumor- and stroma-  
1590 specific subtypes of pancreatic ductal adenocarcinoma. *Nat Genet* *47*, 1168-1178.
- 1591 Muzumdar, M.D., Chen, P.Y., Dorans, K.J., Chung, K.M., Bhutkar, A., Hong, E., Noll, E.M., Sprick, M.R.,  
1592 Trumpp, A., and Jacks, T. (2017). Survival of pancreatic cancer cells lacking KRAS function. *Nat*  
1593 *Commun* *8*, 1090.
- 1594 Nam, A.S., Chaligne, R., and Landau, D.A. (2021). Integrating genetic and non-genetic determinants of  
1595 cancer evolution by single-cell multi-omics. *Nat Rev Genet* *22*, 3-18.
- 1596 Neftel, C., Laffy, J., Filbin, M.G., Hara, T., Shore, M.E., Rahme, G.J., Richman, A.R., Silverbush, D.,  
1597 Shaw, M.L., Hebert, C.M., *et al.* (2019). An Integrative Model of Cellular States, Plasticity, and Genetics  
1598 for Glioblastoma. *Cell* *178*, 835-849 e821.
- 1599 O'Kane, G.M., Grunwald, B.T., Jang, G.H., Masoomian, M., Picardo, S., Grant, R.C., Denroche, R.E.,  
1600 Zhang, A., Wang, Y., Lam, B., *et al.* (2020). GATA6 Expression Distinguishes Classical and Basal-like  
1601 Subtypes in Advanced Pancreatic Cancer. *Clin Cancer Res*.
- 1602 Ohlund, D., Handly-Santana, A., Biffi, G., Elyada, E., Almeida, A.S., Ponz-Sarvise, M., Corbo, V., Oni,  
1603 T.E., Hearn, S.A., Lee, E.J., *et al.* (2017). Distinct populations of inflammatory fibroblasts and  
1604 myofibroblasts in pancreatic cancer. *J Exp Med* *214*, 579-596.
- 1605 Patel, A.P., Tirosh, I., Trombetta, J.J., Shalek, A.K., Gillespie, S.M., Wakimoto, H., Cahill, D.P., Nahed,  
1606 B.V., Curry, W.T., Martuza, R.L., *et al.* (2014). Single-cell RNA-seq highlights intratumoral heterogeneity  
1607 in primary glioblastoma. *Science* *344*, 1396-1401.
- 1608 Pelon, F., Bourachot, B., Kieffer, Y., Magagna, I., Mermet-Meillon, F., Bonnet, I., Costa, A., Givel, A.M.,  
1609 Attieh, Y., Barbazan, J., *et al.* (2020). Cancer-associated fibroblast heterogeneity in axillary lymph nodes  
1610 drives metastases in breast cancer through complementary mechanisms. *Nat Commun* *11*, 404.
- 1611 Philippeos, C., Telerman, S.B., Oules, B., Pisco, A.O., Shaw, T.J., Elgueta, R., Lombardi, G., Driskell,  
1612 R.R., Soldin, M., Lynch, M.D., *et al.* (2018). Spatial and Single-Cell Transcriptional Profiling Identifies  
1613 Functionally Distinct Human Dermal Fibroblast Subpopulations. *J Invest Dermatol* *138*, 811-825.
- 1614 Porter, R.L., Magnus, N.K.C., Thapar, V., Morris, R., Szabolcs, A., Neyaz, A., Kulkarni, A.S., Tai, E.,  
1615 Chougule, A., Hillis, A., *et al.* (2019). Epithelial to mesenchymal plasticity and differential response to  
1616 therapies in pancreatic ductal adenocarcinoma. *Proc Natl Acad Sci U S A*.
- 1617 Puram, S.V., Tirosh, I., Parikh, A.S., Patel, A.P., Yizhak, K., Gillespie, S., Rodman, C., Luo, C.L., Mroz,  
1618 E.A., Emerick, K.S., *et al.* (2017). Single-Cell Transcriptomic Analysis of Primary and Metastatic Tumor  
1619 Ecosystems in Head and Neck Cancer. *Cell* *171*, 1611-1624 e1624.
- 1620 Qadir, M.M.F., Alvarez-Cubela, S., Klein, D., van Dijk, J., Muniz-Anquela, R., Moreno-Hernandez, Y.B.,  
1621 Lanzoni, G., Sadiq, S., Navarro-Rubio, B., Garcia, M.T., *et al.* (2020). Single-cell resolution analysis of  
1622 the human pancreatic ductal progenitor cell niche. *Proc Natl Acad Sci U S A* *117*, 10876-10887.

- 1623 Sade-Feldman, M., Yizhak, K., Bjorgaard, S.L., Ray, J.P., de Boer, C.G., Jenkins, R.W., Lieb, D.J., Chen,  
1624 J.H., Frederick, D.T., Barzily-Rokni, M., *et al.* (2019). Defining T Cell States Associated with Response  
1625 to Checkpoint Immunotherapy in Melanoma. *Cell* 176, 404.
- 1626 Sahai, E., Astsaturon, I., Cukierman, E., DeNardo, D.G., Egeblad, M., Evans, R.M., Fearon, D., Greten,  
1627 F.R., Hingorani, S.R., Hunter, T., *et al.* (2020). A framework for advancing our understanding of cancer-  
1628 associated fibroblasts. *Nat Rev Cancer* 20, 174-186.
- 1629 Schleger, C., Verbeke, C., Hildenbrand, R., Zentgraf, H., and Bleyl, U. (2002). c-MYC activation in primary  
1630 and metastatic ductal adenocarcinoma of the pancreas: incidence, mechanisms, and clinical significance.  
1631 *Mod Pathol* 15, 462-469.
- 1632 Sholl, L.M., Do, K., Shivdasani, P., Cerami, E., Dubuc, A.M., Kuo, F.C., Garcia, E.P., Jia, Y., Davineni,  
1633 P., Abo, R.P., *et al.* (2016). Institutional implementation of clinical tumor profiling on an unselected cancer  
1634 population. *JCI Insight* 1, e87062.
- 1635 Siegel, R.L., Miller, K.D., and Jemal, A. (2020). Cancer statistics, 2020. *CA Cancer J Clin* 70, 7-30.
- 1636 Somerville, T.D.D., Xu, Y., Miyabayashi, K., Tiriach, H., Cleary, C.R., Maia-Silva, D., Milazzo, J.P.,  
1637 Tuveson, D.A., and Vakoc, C.R. (2018). TP63-Mediated Enhancer Reprogramming Drives the Squamous  
1638 Subtype of Pancreatic Ductal Adenocarcinoma. *Cell Rep* 25, 1741-1755 e1747.
- 1639 Spurr, L.F., Touat, M., Taylor, A.M., Dubuc, A.M., Shih, J., Meredith, D.M., Pisano, W.V., Meyerson, M.L.,  
1640 Ligon, K.L., Cherniack, A.D., *et al.* (2020). Quantification of aneuploidy in targeted sequencing data using  
1641 ASCETS. *Bioinformatics*.
- 1642 Suva, M.L., and Tirosh, I. (2019). Single-Cell RNA Sequencing in Cancer: Lessons Learned and  
1643 Emerging Challenges. *Mol Cell* 75, 7-12.
- 1644 Tiriach, H., Belleau, P., Engle, D.D., Plenker, D., Deschenes, A., Somerville, T.D.D., Froeling, F.E.M.,  
1645 Burkhart, R.A., Denroche, R.E., Jang, G.H., *et al.* (2018). Organoid Profiling Identifies Common  
1646 Responders to Chemotherapy in Pancreatic Cancer. *Cancer Discov* 8, 1112-1129.
- 1647 Tirosh, I., Izar, B., Prakadan, S.M., Wadsworth, M.H., 2nd, Treacy, D., Trombetta, J.J., Rotem, A.,  
1648 Rodman, C., Lian, C., Murphy, G., *et al.* (2016a). Dissecting the multicellular ecosystem of metastatic  
1649 melanoma by single-cell RNA-seq. *Science* 352, 189-196.
- 1650 Tirosh, I., Venteicher, A.S., Hebert, C., Escalante, L.E., Patel, A.P., Yizhak, K., Fisher, J.M., Rodman, C.,  
1651 Mount, C., Filbin, M.G., *et al.* (2016b). Single-cell RNA-seq supports a developmental hierarchy in human  
1652 oligodendroglioma. *Nature* 539, 309-313.
- 1653 van Galen, P., Hovestadt, V., Wadsworth, M.H., Hughes, T.K., Griffin, G.K., Battaglia, S., Verga, J.A.,  
1654 Stephansky, J., Pastika, T.J., Lombardi Story, J., *et al.* (2019). Single-Cell RNA-Seq Reveals AML  
1655 Hierarchies Relevant to Disease Progression and Immunity. *Cell* 176, 1265-1281 e1224.
- 1656 Venteicher, A.S., Tirosh, I., Hebert, C., Yizhak, K., Neftel, C., Filbin, M.G., Hovestadt, V., Escalante, L.E.,  
1657 Shaw, M.L., Rodman, C., *et al.* (2017). Decoupling genetics, lineages, and microenvironment in IDH-  
1658 mutant gliomas by single-cell RNA-seq. *Science* 355.
- 1659 Zhang, L., Li, Z., Skrzypczynska, K.M., Fang, Q., Zhang, W., O'Brien, S.A., He, Y., Wang, L., Zhang, Q.,  
1660 Kim, A., *et al.* (2020). Single-Cell Analyses Inform Mechanisms of Myeloid-Targeted Therapies in Colon  
1661 Cancer. *Cell* 181, 442-459 e429.
- 1662 Zilionis, R., Engblom, C., Pfirschke, C., Savova, V., Zemmour, D., Saatcioglu, H.D., Krishnan, I., Maroni,  
1663 G., Meyerovitz, C.V., Kerwin, C.M., *et al.* (2019). Single-Cell Transcriptomics of Human and Mouse Lung  
1664 Cancers Reveals Conserved Myeloid Populations across Individuals and Species. *Immunity* 50, 1317-  
1665 1334 e1310.
